# Supplementary material
Source: publisher site journal article supplement (https://www.spandidos-publications.com/2950/downloadSupplementary)
Supplement: Supplementary file 1 [file downloadSupplementary]

## Sheet: Table S5 GO-Molecular_Function
Table SVI. GO-Molecular Function
GOMFID	Term	Sample number	Background number	Pvalue	corrPvalue	GeneIDs	GeneNames
GO:0008009	chemokine activity	16	33	4.04601e-08	3.55239e-05	498335;305236;117551;287562;245920;81503;287561;360579;116637;60665;360918;25542;306748;688605;24770;114105	Cxcl13;Cxcl11;Ccl22;Ccl12;Cxcl10;Cxcl1;Ccl7;Ccl9;Ccl4;Cxcl6;Pf4;Ccl3;Cxcl14;Ccl1;Ccl2;Cxcl2
GO:0042379	chemokine receptor binding	16	41	4.25177e-07	0.000186653	498335;305236;117551;287562;245920;81503;287561;360579;116637;60665;360918;25542;306748;688605;24770;114105	Cxcl13;Cxcl11;Ccl22;Ccl12;Cxcl10;Cxcl1;Ccl7;Ccl9;Ccl4;Cxcl6;Pf4;Ccl3;Cxcl14;Ccl1;Ccl2;Cxcl2
GO:0005125	cytokine activity	26	124	4.19639e-06	0.00122814	362076;498335;24498;116637;25542;24493;245920;353218;81503;360579;306748;24770;64546;305236;117551;289747;116510;29200;688605;114105;287562;287561;29455;60665;360918;29143	Il36b;Cxcl13;Il6;Ccl4;Ccl3;Il1a;Cxcl10;Tnfsf9;Cxcl1;Ccl9;Cxcl14;Ccl2;Il12b;Cxcl11;Ccl22;Osm;Timp1;Inhba;Ccl1;Cxcl2;Ccl12;Ccl7;Gdf15;Cxcl6;Pf4;Grn
GO:0005539	glycosaminoglycan binding	25	125	1.28717e-05	0.00282534	25728;114122;498997;500996;84387;25542;245920;29569;291437;292406;29610;24770;293186;498335;305236;25651;301227;60379;84397;29366;64057;29268;287561;360918;684050	Apoe;Vcan;Rspo3;Layn;Pglyrp1;Ccl3;Cxcl10;Pcolce;Lipg;Thbs2;Tgfbr3;Ccl2;Lyve1;Cxcl13;Cxcl11;Selp;Trem2;Col5a3;Tnfaip6;Serpine2;Hapln2;Tpsb2;Ccl7;Pf4;PCOLCE2
GO:0005044	scavenger receptor activity	12	34	2.63841e-05	0.00463305	498638;170568;294335;79126;289596;310693;293591;245955;685243;367074;85266;54410	Msr1;Dmbt1;Susd2;Cfi;Corin;Cd5l;Cd163l1;Lgals3bp;Ackr4;Tmprss4;Prss12;Enpp3
GO:0038024	cargo receptor activity	13	45	6.97368e-05	0.0102048	499264;498638;294335;79126;170568;310693;293591;245955;685243;289596;367074;85266;54410	Apobr;Msr1;Susd2;Cfi;Dmbt1;Cd5l;Cd163l1;Lgals3bp;Ackr4;Corin;Tmprss4;Prss12;Enpp3
GO:0001664	G-protein coupled receptor binding	33	221	0.00011852	0.0148659	29597;25524;24213;116637;25542;24232;360918;24890;24310;245920;81503;25686;360579;306748;29290;365901;498335;305236;117551;50592;58966;498997;688605;24770;114105;89788;287562;50672;287561;60665;25083;58812;282836	P2ry2;Psap;Atp1a3;Ccl4;Ccl3;C3;Pf4;Esr1;Ace;Cxcl10;Cxcl1;Gnai1;Ccl9;Cxcl14;Adora1;Gnat2;Cxcl13;Cxcl11;Ccl22;Gria1;Ramp2;Rspo3;Ccl1;Ccl2;Cxcl2;Gna15;Ccl12;Ednrb;Ccl7;Cxcl6;Adra2a;Apln;Cthrc1
GO:0008236	serine-type peptidase activity	25	156	0.000293189	0.0300468	266758;302971;289596;294257;293118;292848;287106;298512;83799;25425;691603;79126;54269;367074;85266;63849;502774;312705;100360872;29268;192262;29266;290757;54271;25627	Sec11c;Prss22;Corin;Cfb;Prcp;Klk13;Prss30;Rhbdl2;Dpp7;Ctsh;LOC691603;Cfi;Mcpt10;Tmprss4;Prss12;Mmp8;Cpvl;C1r;Mcpt1l1;Tpsb2;C1s;Mcpt2;F11;Tpsab1;Cma1
GO:0061134	peptidase regulator activity	26	166	0.000307997	0.0300468	266775;117038;64041;24232;25425;100911545;29569;24648;291091;24795;295703;113898;171112;81707;296257;25308;360228;116510;29366;83928;306251;287526;288001;316521;684050;406161	Serpinb10;Mt3;Birc5;C3;Ctsh;LOC100911545;Pcolce;Serpina1;Serpinb1a;Serpina3n;Serping1;Prdx5;Wfdc1;Mmp14;Cst7;Cstb;Wfdc21;Timp1;Serpine2;Fetub;Itih1;Serpinf1;Kng1l1;Vil1;PCOLCE2;C4b
GO:0017171	serine hydrolase activity	25	159	0.000377406	0.0313748	266758;302971;289596;294257;293118;292848;287106;298512;83799;25425;691603;79126;54269;367074;85266;63849;502774;312705;100360872;29268;192262;29266;290757;54271;25627	Sec11c;Prss22;Corin;Cfb;Prcp;Klk13;Prss30;Rhbdl2;Dpp7;Ctsh;LOC691603;Cfi;Mcpt10;Tmprss4;Prss12;Mmp8;Cpvl;C1r;Mcpt1l1;Tpsb2;C1s;Mcpt2;F11;Tpsab1;Cma1
GO:0008201	heparin binding	18	96	0.000393078	0.0313748	498335;305236;25728;29569;287561;291437;25542;25651;360918;292406;60379;29610;498997;29366;24770;684050;29268;245920	Cxcl13;Cxcl11;Apoe;Pcolce;Ccl7;Lipg;Ccl3;Selp;Pf4;Thbs2;Col5a3;Tgfbr3;Rspo3;Serpine2;Ccl2;PCOLCE2;Tpsb2;Cxcl10
GO:0048020	CCR chemokine receptor binding	7	16	0.0004635	0.0339128	498335;287562;287561;360579;116637;25542;24770	Cxcl13;Ccl12;Ccl7;Ccl9;Ccl4;Ccl3;Ccl2
GO:0046982	protein heterodimerization activity	48	416	0.00104405	0.0698137	498335;64557;684762;100910554;64647;680615;79431;689399;680322;291159;24333;684841;81680;680097;25503;100359692;100912290;58966;114097;306970;25017;79129;100910200;691488;502125;298850;100360754;29290;291157;502129;64546;361247;360243;58940;500987;310678;680312;29200;311723;100360950;24171;64041;25083;306962;140586;100365043;66021;29452	Cxcl13;Bard1;LOC684762;LOC100910554;Hist1h2bl;Hist1h2ak;Bhlhe40;Cenpw;LOC680322;Hist1h2ail;Eno1;LOC684841;Lifr;LOC680097;Ocm2;LOC100359692;LOC100912290;Ramp2;Ltc4s;Hist1h2an;Myo5a;Cyba;LOC100910200;Hist3h2bb;Hist1h2ah;Cenpa;LOC100360754;Adora1;Hist1h2bo;Hist1h2ai;Il12b;Hist1h2bd;Top2a;H2afz;H2afx;Hist2h3c2;Hist1h2bk;Inhba;Sox18;LOC100360950;Add2;Birc5;Adra2a;Hist1h2ac;Sox9;LOC100365043;Cybb;Epas1
GO:0030414	peptidase inhibitor activity	22	144	0.00113907	0.0698137	266775;117038;64041;24232;100911545;24648;291091;24795;295703;113898;171112;296257;25308;360228;116510;29366;83928;306251;287526;288001;316521;406161	Serpinb10;Mt3;Birc5;C3;LOC100911545;Serpina1;Serpinb1a;Serpina3n;Serping1;Prdx5;Wfdc1;Cst7;Cstb;Wfdc21;Timp1;Serpine2;Fetub;Itih1;Serpinf1;Kng1l1;Vil1;C4b
GO:0004866	endopeptidase inhibitor activity	21	135	0.00119272	0.0698137	266775;100911545;83928;296257;288001;291091;306251;25308;287526;64041;24795;171112;117038;24648;295703;406161;29366;116510;113898;316521;24232	Serpinb10;LOC100911545;Fetub;Cst7;Kng1l1;Serpinb1a;Itih1;Cstb;Serpinf1;Birc5;Serpina3n;Wfdc1;Mt3;Serpina1;Serping1;C4b;Serpine2;Timp1;Prdx5;Vil1;C3
GO:0005126	cytokine receptor binding	25	178	0.00158499	0.0780038	362076;498335;24498;116637;25542;81680;24493;245920;353218;60582;81503;360579;306748;29610;24770;64546;305236;117551;289747;688605;114105;287562;287561;60665;360918	Il36b;Cxcl13;Il6;Ccl4;Ccl3;Lifr;Il1a;Cxcl10;Tnfsf9;Il1rn;Cxcl1;Ccl9;Cxcl14;Tgfbr3;Ccl2;Il12b;Cxcl11;Ccl22;Osm;Ccl1;Cxcl2;Ccl12;Ccl7;Cxcl6;Pf4
GO:0031726	CCR1 chemokine receptor binding	4	5	0.00169997	0.0780038	116637;25542;360579;287561	Ccl4;Ccl3;Ccl9;Ccl7
GO:0048248	CXCR3 chemokine receptor binding	4	5	0.00169997	0.0780038	498335;305236;360918;245920	Cxcl13;Cxcl11;Pf4;Cxcl10
GO:0001530	lipopolysaccharide binding	6	15	0.00171196	0.0780038	25350;25651;58949;171569;301227;60350	Sftpd;Selp;Ptafr;Spon2;Trem2;Cd14
GO:0061135	endopeptidase regulator activity	21	140	0.00177685	0.0780038	266775;100911545;83928;296257;288001;291091;306251;25308;287526;64041;24795;171112;117038;24648;295703;406161;29366;116510;113898;316521;24232	Serpinb10;LOC100911545;Fetub;Cst7;Kng1l1;Serpinb1a;Itih1;Cstb;Serpinf1;Birc5;Serpina3n;Wfdc1;Mt3;Serpina1;Serping1;C4b;Serpine2;Timp1;Prdx5;Vil1;C3
GO:0005200	structural constituent of cytoskeleton	10	43	0.00192306	0.0804021	500377;308709;24171;300218;307351;246118;291081;29213;54227;100909441	Tuba8;Synm;Add2;Tuba1c;Tubb6;Tubb3;Tubb2b;Tubb4a;Arpc1b;LOC100909441
GO:0004252	serine-type endopeptidase activity	21	142	0.00207065	0.0826377	691603;302971;289596;192262;294257;79126;29266;290757;292848;54269;312705;63849;100360872;367074;287106;85266;298512;25425;29268;54271;25627	LOC691603;Prss22;Corin;C1s;Cfb;Cfi;Mcpt2;F11;Klk13;Mcpt10;C1r;Mmp8;Mcpt1l1;Tmprss4;Prss30;Prss12;Rhbdl2;Ctsh;Tpsb2;Tpsab1;Cma1
GO:0004175	endopeptidase activity	37	313	0.00251234	0.0959057	302971;25335;298282;56777;292848;63849;287106;298512;117033;304608;24310;691603;79126;289596;54269;63865;85266;29175;81687;81707;367074;305253;294257;66015;25425;312705;100360872;679837;29268;311827;252929;192262;29266;290757;50654;54271;25627	Prss22;Mmp7;Oma1;Adam1a;Klk13;Mmp8;Prss30;Rhbdl2;Mmp12;Mmp19;Ace;LOC691603;Cfi;Corin;Mcpt10;Lgmn;Prss12;Ctsk;Mmp9;Mmp14;Tmprss4;Adamts3;Cfb;Adamts4;Ctsh;C1r;Mcpt1l1;Adam12;Tpsb2;Adamtsl2;Ctsz;C1s;Mcpt2;F11;Ctss;Tpsab1;Cma1
GO:0019865	immunoglobulin binding	6	17	0.0028479	0.104186	684984;681070;289211;83781;365183;25316	Cd300lg;Fcamr;Fcgr2b;Lgals3;Fcar;Ms4a2
GO:0042562	hormone binding	13	73	0.00353896	0.12352	25060;50672;25154;83567;25339;24953;298068;24212;29200;246075;29235;24890;25425	Hk3;Ednrb;Pgr;Mchr1;Npr3;Gcgr;Sec61b;Atp1a2;Inhba;Prlhr;Galr3;Esr1;Ctsh
GO:0016709	oxidoreductase activity, acting on paired donors, with incorporation or reduction of molecular oxygen, NAD(P)H as one donor, and incorporation of one atom of oxygen	8	32	0.00365776	0.12352	246245;25086;25427;140910;29230;24599;84493;25256	Fmo2;Cyp2e1;Cyp51;Msmo1;Sqle;Nos2;Fmo3;Fmo1
GO:0045236	CXCR chemokine receptor binding	4	7	0.00400861	0.130354	498335;305236;360918;245920	Cxcl13;Cxcl11;Pf4;Cxcl10
GO:1901681	sulfur compound binding	22	163	0.00445053	0.139556	25728;25542;59103;245920;29569;292406;291437;81869;29610;24770;498335;305236;25651;60379;498997;29366;29268;287561;83783;360918;114097;684050	Apoe;Ccl3;Ptges;Cxcl10;Pcolce;Thbs2;Lipg;Gstm7;Tgfbr3;Ccl2;Cxcl13;Cxcl11;Selp;Col5a3;Rspo3;Serpine2;Tpsb2;Ccl7;Sult1a1;Pf4;Ltc4s;PCOLCE2
GO:0016491	oxidoreductase activity	59	590	0.00599638	0.181546	690745;290644;58835;24950;246245;117254;83792;246074;84491;100359539;25375;365345;25427;364018;29230;287610;114097;24533;79129;81718;117099;289185;24299;54246;362474;24848;113898;25256;24599;24451;307096;296621;287424;314438;170635;140910;170824;24787;64191;24886;54349;266684;79242;24383;50671;171142;296138;50549;25086;266807;259235;84493;81639;362720;66021;287877;295498;24479;680308	Marc1;Ifi30;Phgdh;Srd5a1;Fmo2;Prdx1;Scd;Scd1;Qsox1;LOC100359539;Aldh3a1;Cyb5r2;Cyp51;Ncf2;Sqle;Lpo;Ltc4s;Ldha;Cyba;Cdo1;Bdh1;Creg1;Cyp2a3;Cyp2f4;Adhfe1;Tph1;Prdx5;Fmo1;Nos2;Hmox1;Akr1c19;Phyhd1;Aloxe3;Degs2;Dhrs9;Msmo1;Steap3;Sod2;Dhcr7;Tbxas1;Aox1;Cyp2d1;Hpgd;Gapdh;Fasn;Lbp;Acoxl;Cyp4a1;Cyp2e1;Duox1;Sdr9c7;Fmo3;Alox15;Rrm2;Cybb;Pycr1;Adh6a;Idh1;Mthfd2
GO:0005540	hyaluronic acid binding	5	15	0.00775918	0.227085	64057;500996;293186;84397;114122	Hapln2;Layn;Lyve1;Tnfaip6;Vcan
GO:0019838	growth factor binding	15	102	0.00872543	0.247127	498335;100911545;89804;60582;83504;25589;84032;25054;25704;64536;29610;81680;298068;65154;29393	Cxcl13;LOC100911545;Tek;Il1rn;Kl;Kdr;Col3a1;Ntrk2;Il2ra;Esm1;Tgfbr3;Lifr;Sec61b;Wisp1;Col1a1
GO:0001848	complement binding	5	16	0.00964894	0.258737	689388;84007;295703;113959;406161	Ptx3;C3ar1;Serping1;C5ar1;C4b
GO:0005506	iron ion binding	22	176	0.00972474	0.258737	83792;246074;25427;24299;54246;100362384;24848;29292;24599;287424;100360087;25732;140910;24886;54349;266684;170496;50549;25086;81639;81718;100363502	Scd;Scd1;Cyp51;Cyp2a3;Cyp2f4;LOC100362384;Tph1;Ftl1;Nos2;Aloxe3;LOC100360087;Acp5;Msmo1;Tbxas1;Aox1;Cyp2d1;Lcn2;Cyp4a1;Cyp2e1;Alox15;Cdo1;LOC100363502
GO:0004222	metalloendopeptidase activity	12	75	0.0102779	0.265411	311827;305253;63849;25335;298282;56777;66015;679837;117033;304608;81707;81687	Adamtsl2;Adamts3;Mmp8;Mmp7;Oma1;Adam1a;Adamts4;Adam12;Mmp12;Mmp19;Mmp14;Mmp9
GO:0030246	carbohydrate binding	27	234	0.0114595	0.284601	294335;25350;25059;500996;500337;25544;502852;117258;314148;298185;24375;24773;24434;114122;502900;680338;89824;25651;311426;362431;689388;689790;83627;83781;679787;406161;54410	Susd2;Sftpd;Hk2;Layn;Clec1a;Sele;Cd207;Cntn1;Clec14a;Frem1;Fuca1;Sftpa1;Gusb;Vcan;Clec12b;Clec12a;Chi3l1;Selp;Siglec1;Clec4a3;Ptx3;Clec2dl1;Galnt5;Lgals3;Clec5a;C4b;Enpp3
GO:0005102	receptor binding	93	1037	0.0116693	0.284601	29597;29366;24498;24493;24310;245920;24392;315691;81869;29610;29290;498335;117551;58966;361537;25453;304913;89788;50672;29455;306636;58812;25589;114203;25524;361689;81707;25054;24832;364754;116637;25203;290361;25686;100911545;60582;81503;84032;24476;306748;24770;24479;50592;56822;25046;171569;498898;114105;24366;24367;360918;29143;24213;25542;81680;24890;25728;353218;306760;192213;192211;316842;2…	P2ry2;Serpine2;Il6;Il1a;Ace;Cxcl10;Gja1;Lingo1;Gstm7;Tgfbr3;Adora1;Cxcl13;Ccl22;Ramp2;Tyrobp;Gdnf;Tnn;Gna15;Ednrb;Gdf15;Efnb2;Apln;Kdr;Sh2b2;Psap;Unc93b1;Mmp14;Ntrk2;Thy1;Fzd8;Ccl4;Ccnb1;Dok2;Gnai1;LOC100911545;Il1rn;Cxcl1;Col3a1;Iapp;Cxcl14;Ccl2;Idh1;Gria1;Cd86;Pigr;Spon2;Dok6;Cxcl2;Fgb;Fgg;Pf4;Grn;Atp1a3;Ccl3;Lifr;Esr1;Apoe;Tnfsf9;Dok3;Rasgrf1;Prom2;Metrnl;Osm;Timp1;Tshb;Ccl1;Ppargc1a;Lbp;Esm1;…
GO:0004497	monooxygenase activity	14	97	0.0126406	0.299959	84493;246245;50549;25086;140910;24299;54246;24886;24848;29230;24599;25427;266684;25256	Fmo3;Fmo2;Cyp4a1;Cyp2e1;Msmo1;Cyp2a3;Cyp2f4;Tbxas1;Tph1;Sqle;Nos2;Cyp51;Cyp2d1;Fmo1
GO:0046983	protein dimerization activity	88	980	0.0134026	0.30967	79431;689399;312897;25503;100912290;81726;361623;81869;315615;83731;29290;502129;498840;498335;58962;360243;24904;25453;29200;311723;100360950;50671;83783;29687;29452;306962;24464;691488;100365043;25728;25054;680322;117254;64041;680097;79129;100910554;306970;29637;81743;24479;50592;56765;680312;362235;66021;298850;25334;25339;291159;81680;100359692;291157;502125;252915;24599;24451;361247;310678;2…	Bhlhe40;Cenpw;Msc;Ocm2;LOC100912290;Mvd;Trim66;Gstm7;Dscaml1;Kcnma1;Adora1;Hist1h2ai;Tmem173;Cxcl13;Hpgds;Top2a;Slc22a1;Gdnf;Inhba;Sox18;LOC100360950;Fasn;Sult1a1;C1qb;Epas1;Hist1h2ac;Hp;Hist3h2bb;LOC100365043;Apoe;Ntrk2;LOC680322;Prdx1;Birc5;LOC680097;Cyba;LOC100910554;Hist1h2an;Hmgcs1;Pde2a;Idh1;Gria1;Plvap;Hist1h2bk;Syndig1;Cybb;Cenpa;Bhlha15;Npr3;Hist1h2ail;Lifr;LOC100359692;Hist1h2bo;Hist1h2…
GO:0070011	peptidase activity, acting on L-amino acid peptides	47	473	0.0141283	0.318068	266758;302971;25335;298282;56777;293118;292848;63849;287106;298512;117033;304608;24310;691603;79126;289596;83799;54242;54269;63865;293676;85266;29175;81687;81707;367074;305253;294257;502774;66015;25425;312705;113936;100360872;679837;29268;311827;252929;192262;29266;290757;296156;498012;315330;50654;54271;25627	Sec11c;Prss22;Mmp7;Oma1;Adam1a;Prcp;Klk13;Mmp8;Prss30;Rhbdl2;Mmp12;Mmp19;Ace;LOC691603;Cfi;Corin;Dpp7;Cpa3;Mcpt10;Lgmn;Ctsw;Prss12;Ctsk;Mmp9;Mmp14;Tmprss4;Adamts3;Cfb;Cpvl;Adamts4;Ctsh;C1r;Cpb2;Mcpt1l1;Adam12;Tpsb2;Adamtsl2;Ctsz;C1s;Mcpt2;F11;Cpxm1;Ace3;Espl1;Ctss;Tpsab1;Cma1
GO:0016705	oxidoreductase activity, acting on paired donors, with incorporation or reduction of molecular oxygen	18	144	0.0180118	0.38284	84493;246245;50549;25086;24848;29230;314438;25427;24299;54246;24886;83792;246074;140910;24599;24451;266684;25256	Fmo3;Fmo2;Cyp4a1;Cyp2e1;Tph1;Sqle;Degs2;Cyp51;Cyp2a3;Cyp2f4;Tbxas1;Scd;Scd1;Msmo1;Nos2;Hmox1;Cyp2d1;Fmo1
GO:0050661	NADP binding	8	44	0.0180216	0.38284	24383;246245;50671;24950;24479;24599;84493;25256	Gapdh;Fmo2;Fasn;Srd5a1;Idh1;Nos2;Fmo3;Fmo1
GO:0015079	potassium ion transmembrane transporter activity	16	123	0.0183135	0.38284	684516;259243;170899;100909725;116649;24212;50599;116745;24213;116695;65199;64120;83731;29639;365391;317170	Kcnc4;Kcnip4;Kcnk2;LOC100909725;Kcnj4;Atp1a2;Kcnj3;Kcnh6;Atp1a3;Kcnd1;Kcnip3;Kcnk13;Kcnma1;Fxyd2;Trpm5;Slc9a7
GO:0008237	metallopeptidase activity	17	134	0.0187609	0.38307	311827;305253;63849;25335;117033;298282;56777;66015;54242;113936;81707;679837;24310;296156;304608;498012;81687	Adamtsl2;Adamts3;Mmp8;Mmp7;Mmp12;Oma1;Adam1a;Adamts4;Cpa3;Cpb2;Mmp14;Adam12;Ace;Cpxm1;Mmp19;Ace3;Mmp9
GO:0016860	intramolecular oxidoreductase activity	8	45	0.0200547	0.394498	58962;683570;171142;100362805;89784;24886;59103;84491	Hpgds;Gnpda1;Lbp;Txndc5;Idi1;Tbxas1;Ptges;Qsox1
GO:0004180	carboxypeptidase activity	6	28	0.0206456	0.394498	502774;296156;54242;113936;498012;24310	Cpvl;Cpxm1;Cpa3;Cpb2;Ace3;Ace
GO:0015081	sodium ion transmembrane transporter activity	14	104	0.0206685	0.394498	84012;50676;298340;315611;29571;365391;24212;24213;25349;25553;25364;29639;24777;317170	Slc1a6;Slc6a12;Slc6a14;Scn4b;Scn10a;Trpm5;Atp1a2;Atp1a3;Scn2b;Slc6a4;Asic2;Fxyd2;Slc10a1;Slc9a7
GO:0050664	oxidoreductase activity, acting on NAD(P)H, oxygen as acceptor	4	13	0.0211684	0.395444	66021;266807;79129;364018	Cybb;Duox1;Cyba;Ncf2
GO:0016175	superoxide-generating NADPH oxidase activity	3	7	0.0230796	0.413549	79129;66021;364018	Cyba;Cybb;Ncf2
GO:0016004	phospholipase activator activity	3	7	0.0230796	0.413549	282838;287562;25542	Gm2a;Ccl12;Ccl3
GO:0032403	protein complex binding	66	730	0.0253121	0.435132	684984;25589;24832;25316;64041;308761;25203;680280;290361;315215;81682;24890;29427;81687;306283;308709;293502;306760;171304;289211;25686;84032;315298;81651;29175;54227;29610;83731;29290;25425;365901;365042;171529;58940;681070;306071;294269;362107;191575;363265;304913;498898;25553;29186;311336;29168;24482;25515;89788;24171;24383;29569;361308;294286;83781;291441;365183;25083;64536;316129;309523;817…	Cd300lg;Kdr;Thy1;Ms4a2;Birc5;Prc1;Ccnb1;Gas2l3;Dok2;Mlc1;Lum;Esr1;Aif1;Mmp9;Anxa8;Synm;Kif22;Dok3;Kif11;Fcgr2b;Gnai1;Col3a1;Racgap1;Cspg4;Ctsk;Arpc1b;Tgfbr3;Kcnma1;Adora1;Ctsh;Gnat2;Rab32;Kif2c;H2afz;Fcamr;Lcp1;RT1-Da;Aif1l;Nme1;Col4a3;Tnn;Dok6;Slc6a4;Cd63;Nusap1;Ubd;Igf1;Plk1;Gna15;Add2;Gapdh;Pcolce;Kif20a;Kifc1;Lgals3;Ska1;Fcar;Adra2a;Esm1;Uhrf1;Kif20b;Mmp14;Myo7a;Vil1;PCOLCE2;Ctss
GO:0033218	amide binding	22	195	0.0254459	0.435132	25728;25339;24950;24953;246075;29235;688090;59103;24310;50719;246118;81869;294269;29200;691657;100360977;404640;50672;24988;114097;81779;25627	Apoe;Npr3;Srd5a1;Gcgr;Prlhr;Galr3;RT1-Bb;Ptges;Ace;Slc7a5;Tubb3;Gstm7;RT1-Da;Inhba;Crip1;LOC100360977;Mrgprx2;Ednrb;RT1-M2;Ltc4s;Sctr;Cma1
GO:0001637	G-protein coupled chemoattractant receptor activity	5	22	0.027757	0.435132	100124593;685243;301066;301086;117029	Cxcr6;Ackr4;Ccr8;Xcr1;Ccr5
GO:0035586	purinergic receptor activity	5	22	0.027757	0.435132	29290;63843;117264;353250;29597	Adora1;P2ry4;P2ry6;Niacr1;P2ry2
GO:0004950	chemokine receptor activity	5	22	0.027757	0.435132	100124593;685243;301066;301086;117029	Cxcr6;Ackr4;Ccr8;Xcr1;Ccr5
GO:0004896	cytokine receptor activity	9	58	0.0283819	0.435132	64546;685243;301066;117022;301086;100124593;117029;25704;81680	Il12b;Ackr4;Ccr8;Il1r2;Xcr1;Cxcr6;Ccr5;Il2ra;Lifr
GO:0004869	cysteine-type endopeptidase inhibitor activity	8	49	0.0298187	0.435132	83928;296257;25308;117038;288001;64041;113898;316521	Fetub;Cst7;Cstb;Mt3;Kng1l1;Birc5;Prdx5;Vil1
GO:0005515	protein binding	365	4748	0.0299226	0.435132	684984;65154;689399;81819;361623;315611;315615;497009;54264;25060;360243;311406;117558;25349;60350;83620;361537;83783;29455;29452;306636;100365043;292301;25524;24834;24832;298068;117254;364754;50592;117258;24571;56765;100910554;24904;288504;63848;294269;140939;171569;24883;307106;365183;29143;170568;302976;299210;192213;301518;295703;24599;24451;680945;25308;113959;116510;117029;500464;29366;2870…	Cd300lg;Wisp1;Cenpw;Pax8;Trim66;Scn4b;Dscaml1;Naaa;Mafb;Hk3;Top2a;Dusp2;Mylk2;Scn2b;Cd14;Cit;Tyrobp;Sult1a1;Gdf15;Epas1;Efnb2;LOC100365043;T;Psap;Tk1;Thy1;Sec61b;Prdx1;Fzd8;Gria1;Cntn1;Muc1;Plvap;LOC100910554;Slc22a1;Snx8;Fxyd7;RT1-Da;Trim63;Spon2;Wt1;Sfmbt2;Fcar;Grn;Dmbt1;Noxo1;Esrrb;Rasgrf1;Prkag3;Serping1;Nos2;Hmox1;Sdf2l1;Cstb;C5ar1;Timp1;Ccr5;Epb41l4b;Serpine2;RGD1565166;Gch1;C1qtnf6;Cxcl6;G…
GO:0060229	lipase activator activity	3	8	0.0302312	0.435132	282838;287562;25542	Gm2a;Ccl12;Ccl3
GO:0004499	N,N-dimethylaniline monooxygenase activity	3	8	0.0302312	0.435132	246245;84493;25256	Fmo2;Fmo3;Fmo1
GO:0005391	sodium:potassium-exchanging ATPase activity	3	8	0.0302312	0.435132	24212;24213;29639	Atp1a2;Atp1a3;Fxyd2
GO:0031681	G-protein beta-subunit binding	3	8	0.0302312	0.435132	54296;50592;171099	Rgs7;Gria1;Rasd2
GO:0042277	peptide binding	21	189	0.0324068	0.45544	114097;50719;404640;50672;81869;246118;25339;24988;24953;25728;294269;29200;25627;691657;81779;246075;100360977;29235;688090;59103;24310	Ltc4s;Slc7a5;Mrgprx2;Ednrb;Gstm7;Tubb3;Npr3;RT1-M2;Gcgr;Apoe;RT1-Da;Inhba;Cma1;Crip1;Sctr;Prlhr;LOC100360977;Galr3;RT1-Bb;Ptges;Ace
GO:0008233	peptidase activity	47	502	0.0326796	0.45544	266758;302971;25335;298282;56777;293118;292848;63849;287106;298512;117033;304608;24310;691603;79126;289596;83799;54242;54269;63865;293676;85266;29175;81687;81707;367074;305253;294257;502774;66015;25425;312705;113936;100360872;679837;29268;311827;252929;192262;29266;290757;296156;498012;315330;50654;54271;25627	Sec11c;Prss22;Mmp7;Oma1;Adam1a;Prcp;Klk13;Mmp8;Prss30;Rhbdl2;Mmp12;Mmp19;Ace;LOC691603;Cfi;Corin;Dpp7;Cpa3;Mcpt10;Lgmn;Ctsw;Prss12;Ctsk;Mmp9;Mmp14;Tmprss4;Adamts3;Cfb;Cpvl;Adamts4;Ctsh;C1r;Cpb2;Mcpt1l1;Adam12;Tpsb2;Adamtsl2;Ctsz;C1s;Mcpt2;F11;Cpxm1;Ace3;Espl1;Ctss;Tpsab1;Cma1
GO:0019955	cytokine binding	9	60	0.0335608	0.455805	64546;100911545;685243;60582;500590;117029;25704;29610;81680	Il12b;LOC100911545;Ackr4;Il1rn;Tnfrsf9;Ccr5;Il2ra;Tgfbr3;Lifr
GO:0008528	G-protein coupled peptide receptor activity	14	112	0.0339664	0.455805	685243;301066;50672;301086;100124593;113959;25339;24807;117029;24953;246075;84007;29235;25033	Ackr4;Ccr8;Ednrb;Xcr1;Cxcr6;C5ar1;Npr3;Tacr1;Ccr5;Gcgr;Prlhr;C3ar1;Galr3;Sstr1
GO:0020037	heme binding	15	123	0.0342632	0.455805	287610;79129;50549;25086;266807;25427;117254;24299;54246;24886;66021;24599;24451;266684;100363502	Lpo;Cyba;Cyp4a1;Cyp2e1;Duox1;Cyp51;Prdx1;Cyp2a3;Cyp2f4;Tbxas1;Cybb;Nos2;Hmox1;Cyp2d1;LOC100363502
GO:0008092	cytoskeletal protein binding	52	568	0.0357013	0.467848	24191;25728;64041;308761;680280;309760;360161;25017;316330;310621;306283;308709;361422;293502;689069;24392;171304;315298;58814;83731;24915;24310;24599;360034;171529;50592;306071;315926;60338;117558;140939;362107;117029;500464;361308;191575;29427;25515;24171;24383;311336;294286;291441;296654;685692;297339;309523;50665;266714;54227;316521;25553	Aldoc;Apoe;Birc5;Prc1;Gas2l3;Mypn;Nek6;Myo5a;Ankrd23;Iqgap3;Anxa8;Synm;Cotl1;Kif22;Parvg;Gja1;Kif11;Racgap1;Tmod2;Kcnma1;Pdlim4;Ace;Nos2;Myrip;Kif2c;Gria1;Lcp1;Pls1;Fxyd5;Mylk2;Trim63;Aif1l;Ccr5;Epb41l4b;Kif20a;Nme1;Aif1;Plk1;Add2;Gapdh;Nusap1;Kifc1;Ska1;Gsn;Gcsam;Capg;Kif20b;Tmsb10;Myo7a;Arpc1b;Vil1;Slc6a4
GO:0005201	extracellular matrix structural constituent	5	24	0.036716	0.474068	363265;84032;60379;25654;29393	Col4a3;Col3a1;Col5a3;Col11a1;Col1a1
GO:0050662	coenzyme binding	20	181	0.0377356	0.474938	296138;29230;171142;50671;79242;24533;25086;690745;58835;24950;84493;246245;289185;66021;24383;54349;25256;24599;29244;24479	Acoxl;Sqle;Lbp;Fasn;Hpgd;Ldha;Cyp2e1;Marc1;Phgdh;Srd5a1;Fmo3;Fmo2;Creg1;Cybb;Gapdh;Aox1;Fmo1;Nos2;Gch1;Idh1
GO:0001608	G-protein coupled nucleotide receptor activity	3	9	0.0384061	0.474938	29597;117264;63843	P2ry2;P2ry6;P2ry4
GO:0045028	G-protein coupled purinergic nucleotide receptor activity	3	9	0.0384061	0.474938	29597;117264;63843	P2ry2;P2ry6;P2ry4
GO:0004553	hydrolase activity, hydrolyzing O-glycosyl compounds	10	72	0.0389561	0.475048	367166;83504;113901;24375;282838;314360;313339;89824;688047;24434	Hyal1;Kl;Chia;Fuca1;Gm2a;Galc;Acer2;Chi3l1;Lyz2;Gusb
GO:0004867	serine-type endopeptidase inhibitor activity	10	73	0.0418213	0.488148	100911545;291091;306251;266775;287526;24795;24648;295703;29366;171112	LOC100911545;Serpinb1a;Itih1;Serpinb10;Serpinf1;Serpina3n;Serpina1;Serping1;Serpine2;Wfdc1
GO:0001653	peptide receptor activity	14	116	0.0425459	0.488148	685243;301066;50672;301086;100124593;113959;25339;24807;117029;24953;246075;84007;29235;25033	Ackr4;Ccr8;Ednrb;Xcr1;Cxcr6;C5ar1;Npr3;Tacr1;Ccr5;Gcgr;Prlhr;C3ar1;Galr3;Sstr1
GO:0071814	protein-lipid complex binding	4	17	0.0433662	0.488148	498638;114122;300027;25728	Msr1;Vcan;Gpihbp1;Apoe
GO:0016502	nucleotide receptor activity	4	17	0.0433662	0.488148	29597;117264;353250;63843	P2ry2;P2ry6;Niacr1;P2ry4
GO:0071813	lipoprotein particle binding	4	17	0.0433662	0.488148	498638;114122;300027;25728	Msr1;Vcan;Gpihbp1;Apoe
GO:0001614	purinergic nucleotide receptor activity	4	17	0.0433662	0.488148	29597;117264;353250;63843	P2ry2;P2ry6;Niacr1;P2ry4
GO:0015077	monovalent inorganic cation transmembrane transporter activity	29	292	0.0451991	0.502339	293650;170899;24212;24213;65199;317170;84012;259243;298340;100909725;315611;684516;83731;29639;24777;360539;116649;50599;116745;25349;25553;297932;25364;685232;365391;50676;29571;116695;64120	Tcirg1;Kcnk2;Atp1a2;Atp1a3;Kcnip3;Slc9a7;Slc1a6;Kcnip4;Slc6a14;LOC100909725;Scn4b;Kcnc4;Kcnma1;Fxyd2;Slc10a1;Slc47a1;Kcnj4;Kcnj3;Kcnh6;Scn2b;Slc6a4;Atp6v0d2;Asic2;Atp6v1a;Trpm5;Slc6a12;Scn10a;Kcnd1;Kcnk13
GO:0008556	potassium-transporting ATPase activity	3	10	0.0475808	0.509463	24212;24213;29639	Atp1a2;Atp1a3;Fxyd2
GO:0070008	serine-type exopeptidase activity	3	10	0.0475808	0.509463	502774;290757;289596	Cpvl;F11;Corin
GO:0010576	metalloenzyme regulator activity	3	10	0.0475808	0.509463	360228;83928;116510	Wfdc21;Fetub;Timp1
GO:0046906	tetrapyrrole binding	15	130	0.0494376	0.522967	287610;79129;50549;25086;266807;25427;117254;24299;54246;24886;66021;24599;24451;266684;100363502	Lpo;Cyba;Cyp4a1;Cyp2e1;Duox1;Cyp51;Prdx1;Cyp2a3;Cyp2f4;Tbxas1;Cybb;Nos2;Hmox1;Cyp2d1;LOC100363502
GO:0003779	actin binding	25	248	0.0521074	0.544647	296654;297339;680280;25017;24310;306283;306071;361422;689069;50665;54227;83731;29427;24599;360034;315926;60338;362107;117029;25553;24171;685692;58814;266714;316521	Gsn;Capg;Gas2l3;Myo5a;Ace;Anxa8;Lcp1;Cotl1;Parvg;Tmsb10;Arpc1b;Kcnma1;Aif1;Nos2;Myrip;Pls1;Fxyd5;Aif1l;Ccr5;Slc6a4;Add2;Gcsam;Tmod2;Myo7a;Vil1
GO:0005248	voltage-gated sodium channel activity	4	19	0.0579624	0.593674	29571;25364;25349;315611	Scn10a;Asic2;Scn2b;Scn4b
GO:0042802	identical protein binding	81	966	0.0581503	0.593674	114203;64557;302976;29592;25728;25334;29584;24834;25054;79431;25350;117254;192262;24333;308761;316129;25542;360243;25503;24890;81687;81726;293504;24464;24533;361623;498840;310344;64041;24476;81869;29637;315615;81743;83731;288504;170496;24599;24451;24479;64546;58962;24383;25339;50592;24904;56765;306071;191573;29292;24778;191575;25453;314818;304913;24787;100360087;25553;307126;25027;287059;361537;2…	Sh2b2;Bard1;Noxo1;Bcat1;Apoe;Bhlha15;Gjb1;Tk1;Ntrk2;Bhlhe40;Sftpd;Prdx1;C1s;Eno1;Prc1;Uhrf1;Ccl3;Top2a;Ocm2;Esr1;Mmp9;Mvd;Qprt;Hp;Ldha;Trim66;Tmem173;Plk4;Birc5;Iapp;Gstm7;Hmgcs1;Dscaml1;Pde2a;Kcnma1;Snx8;Lcn2;Nos2;Hmox1;Idh1;Il12b;Hpgds;Gapdh;Npr3;Gria1;Slc22a1;Plvap;Lcp1;Grin3a;Ftl1;Slc2a1;Nme1;Gdnf;E2f7;Tnn;Sod2;LOC100360087;Slc6a4;Mcm10;Slc16a1;RGD1565166;Tyrobp;Add2;Gja3;Cep72;Fasn;Trip13;Su…
GO:0016798	hydrolase activity, acting on glycosyl bonds	11	90	0.0625394	0.615398	367166;83504;113901;24375;282838;314360;313339;89824;688047;294422;24434	Hyal1;Kl;Chia;Fuca1;Gm2a;Galc;Acer2;Chi3l1;Lyz2;Smpdl3a;Gusb
GO:0005272	sodium channel activity	5	29	0.0661035	0.615398	29571;25364;365391;25349;315611	Scn10a;Asic2;Trpm5;Scn2b;Scn4b
GO:0043027	cysteine-type endopeptidase inhibitor activity involved in apoptotic process	4	20	0.0661242	0.615398	117038;113898;316521;64041	Mt3;Prdx5;Vil1;Birc5
GO:0016209	antioxidant activity	8	59	0.067209	0.615398	287610;114097;25728;266807;117254;24464;24787;113898	Lpo;Ltc4s;Apoe;Duox1;Prdx1;Hp;Sod2;Prdx5
GO:0008146	sulfotransferase activity	7	49	0.0687653	0.615398	302489;288617;83783;287466;295934;307859;499302	Hs6st2;Tpst1;Sult1a1;Wscd1;Chst1;Chst5;Gal3st3
GO:0008329	signaling pattern recognition receptor activity	3	12	0.0687862	0.615398	58949;84387;448830	Ptafr;Pglyrp1;Ly96
GO:0038187	pattern recognition receptor activity	3	12	0.0687862	0.615398	58949;84387;448830	Ptafr;Pglyrp1;Ly96
GO:0008061	chitin binding	2	5	0.0708001	0.615398	89824;113901	Chi3l1;Chia
GO:0004630	phospholipase D activity	2	5	0.0708001	0.615398	361527;24451	Pld3;Hmox1
GO:0043546	molybdopterin cofactor binding	2	5	0.0708001	0.615398	54349;690745	Aox1;Marc1
GO:0086006	voltage-gated sodium channel activity involved in cardiac muscle cell action potential	2	5	0.0708001	0.615398	315611;25349	Scn4b;Scn2b
GO:0042910	xenobiotic transporter activity	2	5	0.0708001	0.615398	24778;24891	Slc2a1;Abcb4
GO:0004620	phospholipase activity	8	60	0.0720508	0.615398	361527;291437;29692;690625;294422;29290;362619;24451	Pld3;Lipg;Pla2g2a;Oc90;Smpdl3a;Adora1;Smpdl3b;Hmox1
GO:0043028	cysteine-type endopeptidase regulator activity involved in apoptotic process	5	30	0.0731893	0.615398	117038;113898;316521;64041;25425	Mt3;Prdx5;Vil1;Birc5;Ctsh
GO:0008238	exopeptidase activity	10	82	0.0741613	0.615398	289596;502774;290757;296156;54242;113936;25425;83799;498012;24310	Corin;Cpvl;F11;Cpxm1;Cpa3;Cpb2;Ctsh;Dpp7;Ace3;Ace
GO:0031683	G-protein beta/gamma-subunit complex binding	4	21	0.0748481	0.615398	29290;25686;365901;89788	Adora1;Gnai1;Gnat2;Gna15
GO:0022803	passive transmembrane transporter activity	31	334	0.0762165	0.615398	406864;170899;684516;314847;65199;259243;24392;29465;29695;100909725;315611;83731;29639;79217;29584;63848;50592;191573;60338;116649;50599;116745;25349;25364;365391;25753;29571;116695;64120;116831;81658	Clic1;Kcnk2;Kcnc4;Best3;Kcnip3;Kcnip4;Gja1;Trpv2;Gabrr2;LOC100909725;Scn4b;Kcnma1;Fxyd2;Gja3;Gjb1;Fxyd7;Gria1;Grin3a;Fxyd5;Kcnj4;Kcnj3;Kcnh6;Scn2b;Asic2;Trpm5;Chrng;Scn10a;Kcnd1;Kcnk13;Fxyd3;Gabrp
GO:0015267	channel activity	31	334	0.0762165	0.615398	406864;170899;684516;314847;65199;259243;24392;29465;29695;100909725;315611;83731;29639;79217;29584;63848;50592;191573;60338;116649;50599;116745;25349;25364;365391;25753;29571;116695;64120;116831;81658	Clic1;Kcnk2;Kcnc4;Best3;Kcnip3;Kcnip4;Gja1;Trpv2;Gabrr2;LOC100909725;Scn4b;Kcnma1;Fxyd2;Gja3;Gjb1;Fxyd7;Gria1;Grin3a;Fxyd5;Kcnj4;Kcnj3;Kcnh6;Scn2b;Asic2;Trpm5;Chrng;Scn10a;Kcnd1;Kcnk13;Fxyd3;Gabrp
GO:0005178	integrin binding	8	61	0.0770987	0.615398	84032;24832;64536;304913;25589;363265;24482;81707	Col3a1;Thy1;Esm1;Tnn;Kdr;Col4a3;Igf1;Mmp14
GO:0048037	cofactor binding	24	248	0.0780413	0.615398	58835;24950;64041;24232;29230;286896;24533;690745;289185;24962;25256;24599;84493;24479;246245;54349;79242;24383;171142;50671;296138;25086;66021;29244	Phgdh;Srd5a1;Birc5;C3;Sqle;Sgpl1;Ldha;Marc1;Creg1;Cth;Fmo1;Nos2;Fmo3;Idh1;Fmo2;Aox1;Hpgd;Gapdh;Lbp;Fasn;Acoxl;Cyp2e1;Cybb;Gch1
GO:0005243	gap junction channel activity	3	13	0.0807265	0.615398	29584;79217;24392	Gjb1;Gja3;Gja1
GO:0019956	chemokine binding	3	13	0.0807265	0.615398	100911545;685243;117029	LOC100911545;Ackr4;Ccr5
GO:0015026	coreceptor activity	3	13	0.0807265	0.615398	100124593;58966;29610	Cxcr6;Ramp2;Tgfbr3
GO:0005267	potassium channel activity	12	106	0.0807476	0.615398	684516;259243;170899;100909725;116649;50599;116745;116695;65199;64120;83731;365391	Kcnc4;Kcnip4;Kcnk2;LOC100909725;Kcnj4;Kcnj3;Kcnh6;Kcnd1;Kcnip3;Kcnk13;Kcnma1;Trpm5
GO:0017022	myosin binding	6	41	0.0815075	0.615398	360034;50592;117558;685692;25553;310621	Myrip;Gria1;Mylk2;Gcsam;Slc6a4;Iqgap3
GO:0005518	collagen binding	6	41	0.0815075	0.615398	29569;81651;29175;81682;684050;50654	Pcolce;Cspg4;Ctsk;Lum;PCOLCE2;Ctss
GO:0008081	phosphoric diester hydrolase activity	8	63	0.0878125	0.615398	361527;363781;362619;81743;294422;29290;24451;54410	Pld3;Plcxd2;Smpdl3b;Pde2a;Smpdl3a;Adora1;Hmox1;Enpp3
GO:0005496	steroid binding	8	63	0.0878125	0.615398	679975;25154;299210;192211;24212;25557;24890;24482	Gpr183;Pgr;Esrrb;Prom2;Atp1a2;Star;Esr1;Igf1
GO:0016853	isomerase activity	14	131	0.0880116	0.615398	58962;287424;360243;683570;171142;100362805;89784;300211;81639;29637;24886;100360977;59103;84491	Hpgds;Aloxe3;Top2a;Gnpda1;Lbp;Txndc5;Idi1;Fkbp11;Alox15;Hmgcs1;Tbxas1;LOC100360977;Ptges;Qsox1
GO:0016298	lipase activity	9	74	0.0882385	0.615398	361527;291437;25330;29692;690625;294422;29290;362619;24451	Pld3;Lipg;Lipe;Pla2g2a;Oc90;Smpdl3a;Adora1;Smpdl3b;Hmox1
GO:0051015	actin filament binding	9	74	0.0882385	0.615398	306283;306071;24171;362107;54227;25553;266714;29427;316521	Anxa8;Lcp1;Add2;Aif1l;Arpc1b;Slc6a4;Myo7a;Aif1;Vil1
GO:0033691	sialic acid binding	2	6	0.0904418	0.615398	25544;25651	Sele;Selp
GO:0042834	peptidoglycan binding	2	6	0.0904418	0.615398	301227;84387	Trem2;Pglyrp1
GO:0046870	cadmium ion binding	2	6	0.0904418	0.615398	117038;689415	Mt3;Mt2A
GO:0031730	CCR5 chemokine receptor binding	2	6	0.0904418	0.615398	116637;25542	Ccl4;Ccl3
GO:0070492	oligosaccharide binding	2	6	0.0904418	0.615398	25544;25651	Sele;Selp
GO:0042806	fucose binding	2	6	0.0904418	0.615398	24375;25651	Fuca1;Selp
GO:0005068	transmembrane receptor protein tyrosine kinase adaptor activity	2	6	0.0904418	0.615398	114203;290361	Sh2b2;Dok2
GO:0004568	chitinase activity	2	6	0.0904418	0.615398	89824;113901	Chi3l1;Chia
GO:0008504	monoamine transmembrane transporter activity	2	6	0.0904418	0.615398	25553;24904	Slc6a4;Slc22a1
GO:0004857	enzyme inhibitor activity	24	253	0.0910744	0.615398	266775;117038;64041;100911545;24232;307472;24648;291091;24795;259225;295703;113898;171112;296257;25308;360228;116510;29366;83928;306251;287526;288001;316521;406161	Serpinb10;Mt3;Birc5;LOC100911545;C3;Sh3rf2;Serpina1;Serpinb1a;Serpina3n;Ppp1r14b;Serping1;Prdx5;Wfdc1;Cst7;Cstb;Wfdc21;Timp1;Serpine2;Fetub;Itih1;Serpinf1;Kng1l1;Vil1;C4b
GO:0050660	flavin adenine dinucleotide binding	8	64	0.0934773	0.615398	246245;296138;66021;54349;25256;24599;84493;29230	Fmo2;Acoxl;Cybb;Aox1;Fmo1;Nos2;Fmo3;Sqle
GO:0010181	FMN binding	3	14	0.093489	0.615398	25086;289185;24599	Cyp2e1;Creg1;Nos2
GO:0043295	glutathione binding	3	14	0.093489	0.615398	114097;81869;59103	Ltc4s;Gstm7;Ptges
GO:1900750	oligopeptide binding	3	14	0.093489	0.615398	114097;81869;59103	Ltc4s;Gstm7;Ptges
GO:0005149	interleukin-1 receptor binding	3	14	0.093489	0.615398	362076;24493;60582	Il36b;Il1a;Il1rn
GO:0016504	peptidase activator activity	4	23	0.0939218	0.615398	684050;81707;29569;25425	PCOLCE2;Mmp14;Pcolce;Ctsh
GO:0005326	neurotransmitter transporter activity	4	23	0.0939218	0.615398	50676;298340;24904;25553	Slc6a12;Slc6a14;Slc22a1;Slc6a4
GO:0008199	ferric iron binding	4	24	0.104235	0.648451	100360087;29292;25732;100362384	LOC100360087;Ftl1;Acp5;LOC100362384
GO:0017080	sodium channel regulator activity	4	24	0.104235	0.648451	315611;29639;25349;287106	Scn4b;Fxyd2;Scn2b;Prss30
GO:0004601	peroxidase activity	5	34	0.105427	0.648451	117254;287610;113898;266807;114097	Prdx1;Lpo;Prdx5;Duox1;Ltc4s
GO:0051183	vitamin transporter activity	3	15	0.107017	0.648451	24778;171049;293154	Slc2a1;Folr1;Folr2
GO:0004181	metallocarboxypeptidase activity	3	15	0.107017	0.648451	54242;113936;296156	Cpa3;Cpb2;Cpxm1
GO:0005216	ion channel activity	28	309	0.107119	0.648451	406864;170899;684516;314847;65199;259243;29465;29695;100909725;315611;83731;29639;25753;63848;50592;191573;60338;116649;50599;116745;25349;25364;365391;29571;116695;64120;116831;81658	Clic1;Kcnk2;Kcnc4;Best3;Kcnip3;Kcnip4;Trpv2;Gabrr2;LOC100909725;Scn4b;Kcnma1;Fxyd2;Chrng;Fxyd7;Gria1;Grin3a;Fxyd5;Kcnj4;Kcnj3;Kcnh6;Scn2b;Asic2;Trpm5;Scn10a;Kcnd1;Kcnk13;Fxyd3;Gabrp
GO:0046873	metal ion transmembrane transporter activity	29	323	0.110697	0.648451	170899;29599;24212;24213;65199;317170;84012;259243;298340;29465;100909725;315611;684516;83731;29639;24777;191573;116649;50599;116745;25349;25553;25364;365391;306009;50676;29571;116695;64120	Kcnk2;Atp2b3;Atp1a2;Atp1a3;Kcnip3;Slc9a7;Slc1a6;Kcnip4;Slc6a14;Trpv2;LOC100909725;Scn4b;Kcnc4;Kcnma1;Fxyd2;Slc10a1;Grin3a;Kcnj4;Kcnj3;Kcnh6;Scn2b;Slc6a4;Asic2;Trpm5;Slc39a14;Slc6a12;Scn10a;Kcnd1;Kcnk13
GO:0043024	ribosomal small subunit binding	2	7	0.111436	0.648451	24649;191575	Pim1;Nme1
GO:0019215	intermediate filament binding	2	7	0.111436	0.648451	308709;191575	Synm;Nme1
GO:0016717	oxidoreductase activity, acting on paired donors, with oxidation of a pair of donors resulting in the reduction of molecular oxygen to two molecules of water	2	7	0.111436	0.648451	83792;246074	Scd;Scd1
GO:0016846	carbon-sulfur lyase activity	2	7	0.111436	0.648451	114097;24962	Ltc4s;Cth
GO:0019966	interleukin-1 binding	2	7	0.111436	0.648451	100911545;60582	LOC100911545;Il1rn
GO:0004767	sphingomyelin phosphodiesterase activity	2	7	0.111436	0.648451	294422;362619	Smpdl3a;Smpdl3b
GO:0019870	potassium channel inhibitor activity	2	7	0.111436	0.648451	170899;81639	Kcnk2;Alox15
GO:0008172	S-methyltransferase activity	2	7	0.111436	0.648451	368066;690050	Inmt;Tpmt
GO:0001849	complement component C1q binding	2	7	0.111436	0.648451	689388;406161	Ptx3;C4b
GO:0050839	cell adhesion molecule binding	12	113	0.111522	0.648451	24366;60338;84032;24832;64536;304913;24367;25589;363265;24599;24482;81707	Fgb;Fxyd5;Col3a1;Thy1;Esm1;Tnn;Fgg;Kdr;Col4a3;Nos2;Igf1;Mmp14
GO:0016684	oxidoreductase activity, acting on peroxide as acceptor	5	35	0.114419	0.65883	117254;287610;113898;266807;114097	Prdx1;Lpo;Prdx5;Duox1;Ltc4s
GO:0022857	transmembrane transporter activity	61	743	0.114807	0.65883	293650;406864;170899;117596;360539;29599;684516;24213;65199;170913;80900;24891;317170;84012;50719;259243;24392;298340;29465;29695;362861;100909725;315611;300027;24904;83731;29639;79217;24777;29584;63848;50592;63997;191573;60338;116649;24212;50599;116745;25364;83509;25553;297932;298504;25027;685232;365391;310392;306009;50676;25753;314847;29571;25349;288026;29440;116695;64120;116831;81658;24778	Tcirg1;Clic1;Kcnk2;Atp6v1b2;Slc47a1;Atp2b3;Kcnc4;Atp1a3;Kcnip3;Abcb1a;Slco1a5;Abcb4;Slc9a7;Slc1a6;Slc7a5;Kcnip4;Gja1;Slc6a14;Trpv2;Gabrr2;Slc41a2;LOC100909725;Scn4b;Gpihbp1;Slc22a1;Kcnma1;Fxyd2;Gja3;Slc10a1;Gjb1;Fxyd7;Gria1;Slc29a1;Grin3a;Fxyd5;Kcnj4;Atp1a2;Kcnj3;Kcnh6;Asic2;Slc7a7;Slc6a4;Atp6v0d2;Mfsd2a;Slc16a1;Atp6v1a;Trpm5;Slc7a11;Slc39a14;Slc6a12;Chrng;Best3;Scn10a;Scn2b;Atp13a4;Slc26a4;Kcnd1…
GO:0016820	hydrolase activity, acting on acid anhydrides, catalyzing transmembrane movement of substances	9	79	0.11603	0.66152	288026;24891;117596;29599;24212;24213;170913;685232;29639	Atp13a4;Abcb4;Atp6v1b2;Atp2b3;Atp1a2;Atp1a3;Abcb1a;Atp6v1a;Fxyd2
GO:0008017	microtubule binding	14	138	0.116936	0.662386	293502;171304;311336;294286;291441;315298;171529;361308;64041;308761;309523;680280;24383;25515	Kif22;Kif11;Nusap1;Kifc1;Ska1;Racgap1;Kif2c;Kif20a;Birc5;Prc1;Kif20b;Gas2l3;Gapdh;Plk1
GO:0003777	microtubule motor activity	6	46	0.118432	0.666557	171529;171304;294286;361308;293502;309523	Kif2c;Kif11;Kifc1;Kif20a;Kif22;Kif20b
GO:0008144	drug binding	12	115	0.121413	0.676984	360243;50671;300211;117038;24614;29637;689415;81743;100360977;25704;25553;24310	Top2a;Fasn;Fkbp11;Mt3;Orm1;Hmgcs1;Mt2A;Pde2a;LOC100360977;Il2ra;Slc6a4;Ace
GO:0008028	monocarboxylic acid transmembrane transporter activity	4	26	0.126308	0.676984	50676;80900;24777;25027	Slc6a12;Slco1a5;Slc10a1;Slc16a1
GO:0016614	oxidoreductase activity, acting on CH-OH group of donors	12	116	0.126539	0.676984	50671;171142;79242;24533;259235;58835;117099;362474;170635;25375;54349;24479	Fasn;Lbp;Hpgd;Ldha;Sdr9c7;Phgdh;Bdh1;Adhfe1;Dhrs9;Aldh3a1;Aox1;Idh1
GO:0017046	peptide hormone binding	6	47	0.126671	0.676984	50672;25339;24953;29200;246075;29235	Ednrb;Npr3;Gcgr;Inhba;Prlhr;Galr3
GO:0022804	active transmembrane transporter activity	21	228	0.131311	0.676984	84012;50676;24891;298340;24778;29440;288026;29599;24212;24213;25553;24904;170913;298504;25027;685232;360539;80900;29639;24777;317170	Slc1a6;Slc6a12;Abcb4;Slc6a14;Slc2a1;Slc26a4;Atp13a4;Atp2b3;Atp1a2;Atp1a3;Slc6a4;Slc22a1;Abcb1a;Mfsd2a;Slc16a1;Atp6v1a;Slc47a1;Slco1a5;Fxyd2;Slc10a1;Slc9a7
GO:0005516	calmodulin binding	12	117	0.131784	0.676984	24171;170897;24599;117558;64160;29599;289054;24962;266714;25510;25017;310621	Add2;Sphk1;Nos2;Mylk2;Basp1;Atp2b3;Aspm;Cth;Myo7a;Pcp4;Myo5a;Iqgap3
GO:0017127	cholesterol transporter activity	2	8	0.133525	0.676984	25557;25728	Star;Apoe
GO:0005542	folic acid binding	2	8	0.133525	0.676984	171049;293154	Folr1;Folr2
GO:0016832	aldehyde-lyase activity	2	8	0.133525	0.676984	24191;286896	Aldoc;Sgpl1
GO:0008191	metalloendopeptidase inhibitor activity	2	8	0.133525	0.676984	83928;116510	Fetub;Timp1
GO:0016174	NAD(P)H oxidase activity	2	8	0.133525	0.676984	266807;66021	Duox1;Cybb
GO:0016290	palmitoyl-CoA hydrolase activity	2	8	0.133525	0.676984	50559;361993	Acot1;Them5
GO:0051920	peroxiredoxin activity	2	8	0.133525	0.676984	117254;113898	Prdx1;Prdx5
GO:0019763	immunoglobulin receptor activity	2	8	0.133525	0.676984	25316;25046	Ms4a2;Pigr
GO:0048551	metalloenzyme inhibitor activity	2	8	0.133525	0.676984	83928;116510	Fetub;Timp1
GO:0015248	sterol transporter activity	2	8	0.133525	0.676984	25557;25728	Star;Apoe
GO:0022838	substrate-specific channel activity	28	318	0.133953	0.676984	406864;170899;684516;314847;65199;259243;29465;29695;100909725;315611;83731;29639;25753;63848;50592;191573;60338;116649;50599;116745;25349;25364;365391;29571;116695;64120;116831;81658	Clic1;Kcnk2;Kcnc4;Best3;Kcnip3;Kcnip4;Trpv2;Gabrr2;LOC100909725;Scn4b;Kcnma1;Fxyd2;Chrng;Fxyd7;Gria1;Grin3a;Fxyd5;Kcnj4;Kcnj3;Kcnh6;Scn2b;Asic2;Trpm5;Scn10a;Kcnd1;Kcnk13;Fxyd3;Gabrp
GO:0072341	modified amino acid binding	6	48	0.13518	0.676984	365377;293154;114097;81869;171049;59103	Trim72;Folr2;Ltc4s;Gstm7;Folr1;Ptges
GO:0043394	proteoglycan binding	3	17	0.136127	0.676984	29175;60379;50654	Ctsk;Col5a3;Ctss
GO:0005242	inward rectifier potassium channel activity	3	17	0.136127	0.676984	116745;116649;50599	Kcnh6;Kcnj4;Kcnj3
GO:0016616	oxidoreductase activity, acting on the CH-OH group of donors, NAD or NADP as acceptor	11	106	0.137153	0.676984	50671;171142;79242;24533;259235;58835;117099;170635;25375;54349;24479	Fasn;Lbp;Hpgd;Ldha;Sdr9c7;Phgdh;Bdh1;Dhrs9;Aldh3a1;Aox1;Idh1
GO:0005215	transporter activity	75	943	0.137773	0.676984	317170;293650;406864;140868;170899;117596;360539;293154;29599;684516;24213;65199;170913;315215;59267;80900;24891;25728;84012;50719;259243;24392;298340;29465;29695;362861;100909725;300027;315611;65046;81820;24904;83731;29639;170496;24777;29584;63848;50592;58966;63997;191573;60338;116649;24212;50599;116745;25557;25364;83509;24778;60566;297932;298504;25027;685232;365391;310392;25753;306009;50676;500…	Slc9a7;Tcirg1;Clic1;Fabp5;Kcnk2;Atp6v1b2;Slc47a1;Folr2;Atp2b3;Kcnc4;Atp1a3;Kcnip3;Abcb1a;Mlc1;Syt7;Slco1a5;Abcb4;Apoe;Slc1a6;Slc7a5;Kcnip4;Gja1;Slc6a14;Trpv2;Gabrr2;Slc41a2;LOC100909725;Gpihbp1;Scn4b;Ap2s1;Doc2b;Slc22a1;Kcnma1;Fxyd2;Lcn2;Slc10a1;Gjb1;Fxyd7;Gria1;Ramp2;Slc29a1;Grin3a;Fxyd5;Kcnj4;Atp1a2;Kcnj3;Kcnh6;Star;Asic2;Slc7a7;Slc2a1;Syt8;Atp6v0d2;Mfsd2a;Slc16a1;Atp6v1a;Trpm5;Slc7a11;Chrng;Sl…
GO:0001102	RNA polymerase II activating transcription factor binding	4	27	0.138018	0.676984	292301;79431;155430;114090	T;Bhlhe40;Hey2;Egr2
GO:0016836	hydro-lyase activity	5	38	0.143458	0.690672	24333;297814;29242;50671;171142	Eno1;Car8;Car4;Fasn;Lbp
GO:0019829	cation-transporting ATPase activity	6	49	0.14395	0.690672	288026;29599;24212;24213;685232;29639	Atp13a4;Atp2b3;Atp1a2;Atp1a3;Atp6v1a;Fxyd2
GO:0022832	voltage-gated channel activity	15	156	0.143956	0.690672	684516;259243;25349;406864;170899;29571;116649;50599;116745;315611;116695;65199;64120;83731;25364	Kcnc4;Kcnip4;Scn2b;Clic1;Kcnk2;Scn10a;Kcnj4;Kcnj3;Kcnh6;Scn4b;Kcnd1;Kcnip3;Kcnk13;Kcnma1;Asic2
GO:0005244	voltage-gated ion channel activity	15	156	0.143956	0.690672	684516;259243;25349;406864;170899;29571;116649;50599;116745;315611;116695;65199;64120;83731;25364	Kcnc4;Kcnip4;Scn2b;Clic1;Kcnk2;Scn10a;Kcnj4;Kcnj3;Kcnh6;Scn4b;Kcnd1;Kcnip3;Kcnk13;Kcnma1;Asic2
GO:0016782	transferase activity, transferring sulfur-containing groups	7	61	0.150008	0.707944	302489;288617;83783;287466;295934;307859;499302	Hs6st2;Tpst1;Sult1a1;Wscd1;Chst1;Chst5;Gal3st3
GO:0015662	ATPase activity, coupled to transmembrane movement of ions, phosphorylative mechanism	4	28	0.150144	0.707944	24212;24213;29639;29599	Atp1a2;Atp1a3;Fxyd2;Atp2b3
GO:0015075	ion transmembrane transporter activity	52	640	0.150785	0.707944	293650;406864;170899;29599;684516;24213;65199;25364;80900;317170;84012;50719;259243;298340;29465;29695;362861;100909725;315611;24904;83731;29639;25753;24777;360539;63848;50592;191573;60338;116649;24212;50599;116745;25349;83509;25553;297932;25027;685232;365391;310392;306009;50676;314847;29571;288026;29440;116695;64120;116831;81658;24778	Tcirg1;Clic1;Kcnk2;Atp2b3;Kcnc4;Atp1a3;Kcnip3;Asic2;Slco1a5;Slc9a7;Slc1a6;Slc7a5;Kcnip4;Slc6a14;Trpv2;Gabrr2;Slc41a2;LOC100909725;Scn4b;Slc22a1;Kcnma1;Fxyd2;Chrng;Slc10a1;Slc47a1;Fxyd7;Gria1;Grin3a;Fxyd5;Kcnj4;Atp1a2;Kcnj3;Kcnh6;Scn2b;Slc7a7;Slc6a4;Atp6v0d2;Slc16a1;Atp6v1a;Trpm5;Slc7a11;Slc39a14;Slc6a12;Best3;Scn10a;Atp13a4;Slc26a4;Kcnd1;Kcnk13;Fxyd3;Gabrp;Slc2a1
GO:0097367	carbohydrate derivative binding	127	1661	0.151422	0.707944	29597;89813;500996;29599;113901;29213;84387;245920;81726;353250;246118;289185;29610;29290;84492;498840;365042;89804;360243;294071;117558;362510;191575;60350;25515;83620;89788;25544;83783;294286;60450;288026;25589;25350;25728;25059;501854;24834;25054;54237;365377;365298;117258;291885;29728;81743;24770;116720;89824;63843;171569;64057;113976;360621;691998;291081;360918;287561;29437;500377;171576;498…	P2ry2;Pdk4;Layn;Atp2b3;Chia;Tubb4a;Pglyrp1;Cxcl10;Mvd;Niacr1;Tubb3;Creg1;Tgfbr3;Adora1;Tec;Tmem173;Rab32;Tek;Top2a;Hells;Mylk2;Melk;Nme1;Cd14;Plk1;Cit;Gna15;Sele;Sult1a1;Kifc1;Matk;Atp13a4;Kdr;Sftpd;Apoe;Hk2;Rab7b;Tk1;Ntrk2;Cdk1;Trim72;Alpk3;Cntn1;Mcm5;Mcm4;Pde2a;Ccl2;Pik3c2g;Chi3l1;P2ry4;Spon2;Hapln2;Acsl4;Cdc6;Nlrp1b;Tubb2b;Pf4;Ccl7;Acta1;Tuba8;Bub1b;Rspo3;Fignl1;Ttk;Atp1a2;Atp1a3;Ccl3;Nek6;Abc…
GO:0005328	neurotransmitter:sodium symporter activity	3	18	0.151587	0.707944	50676;25553;298340	Slc6a12;Slc6a4;Slc6a14
GO:0030234	enzyme regulator activity	49	602	0.155973	0.715567	302976;25728;192213;266775;24832;117038;64041;54296;25542;24232;310621;307472;29569;24648;291091;25308;315298;24795;259225;295703;116510;113898;25425;24599;171112;81707;296257;100911545;360228;361442;288589;498709;289076;29366;24482;54289;83620;293693;83928;287562;306279;306251;287526;114097;288001;282838;316521;684050;406161	Noxo1;Apoe;Rasgrf1;Serpinb10;Thy1;Mt3;Birc5;Rgs7;Ccl3;C3;Iqgap3;Sh3rf2;Pcolce;Serpina1;Serpinb1a;Cstb;Racgap1;Serpina3n;Ppp1r14b;Serping1;Timp1;Prdx5;Ctsh;Nos2;Wfdc1;Mmp14;Cst7;LOC100911545;Wfdc21;Sipa1l2;Rasa4;Cks2;Rgs18;Serpine2;Igf1;Rgs1;Cit;Cdc42bpg;Fetub;Ccl12;Arhgap22;Itih1;Serpinf1;Ltc4s;Kng1l1;Gm2a;Vil1;PCOLCE2;C4b
GO:0051184	cofactor transporter activity	2	9	0.156479	0.715567	171049;293154	Folr1;Folr2
GO:0001846	opsonin binding	2	9	0.156479	0.715567	689388;406161	Ptx3;C4b
GO:0016653	oxidoreductase activity, acting on NAD(P)H, heme protein as acceptor	2	9	0.156479	0.715567	24599;365345	Nos2;Cyb5r2
GO:0042625	ATPase activity, coupled to transmembrane movement of ions	6	51	0.162237	0.736154	288026;29599;24212;24213;685232;29639	Atp13a4;Atp2b3;Atp1a2;Atp1a3;Atp6v1a;Fxyd2
GO:0042605	peptide antigen binding	4	29	0.162658	0.736154	294269;50719;24988;688090	RT1-Da;Slc7a5;RT1-M2;RT1-Bb
GO:0017134	fibroblast growth factor binding	3	19	0.167568	0.743055	498335;29610;83504	Cxcl13;Tgfbr3;Kl
GO:0030247	polysaccharide binding	3	19	0.167568	0.743055	689388;294335;54410	Ptx3;Susd2;Enpp3
GO:0016628	oxidoreductase activity, acting on the CH-CH group of donors, NAD or NADP as acceptor	3	19	0.167568	0.743055	64191;24950;50671	Dhcr7;Srd5a1;Fasn
GO:0001871	pattern binding	3	19	0.167568	0.743055	689388;294335;54410	Ptx3;Susd2;Enpp3
GO:0016810	hydrolase activity, acting on carbon-nitrogen (but not peptide) bonds	10	99	0.16863	0.743792	54282;25415;302972;29244;313339;498992;25383;84387;497009;29221	Padi1;Crmp1;Amdhd2;Gch1;Acer2;Vnn3;Apobec1;Pglyrp1;Naaa;Arg1
GO:0008289	lipid binding	37	447	0.169429	0.743792	311559;302976;25350;25728;25154;299210;24832;24212;679975;365377;24232;29692;24890;306283;114097;26989;140868;315298;192211;117099;81820;288504;116720;58949;25651;171569;25557;301227;60350;24482;59267;81639;100363502;282838;499926;316521;65178	Bpifa5;Noxo1;Sftpd;Apoe;Pgr;Esrrb;Thy1;Atp1a2;Gpr183;Trim72;C3;Pla2g2a;Esr1;Anxa8;Ltc4s;Cadps;Fabp5;Racgap1;Prom2;Bdh1;Doc2b;Snx8;Pik3c2g;Ptafr;Selp;Spon2;Star;Trem2;Cd14;Igf1;Syt7;Alox15;LOC100363502;Gm2a;Bpifb1;Vil1;Snap91
GO:0015291	secondary active transmembrane transporter activity	13	137	0.175125	0.762956	84012;50676;298340;29440;24778;25553;24904;298504;25027;360539;80900;24777;317170	Slc1a6;Slc6a12;Slc6a14;Slc26a4;Slc2a1;Slc6a4;Slc22a1;Mfsd2a;Slc16a1;Slc47a1;Slco1a5;Slc10a1;Slc9a7
GO:1901618	organic hydroxy compound transmembrane transporter activity	4	30	0.175532	0.762956	80900;24904;24777;25553	Slco1a5;Slc22a1;Slc10a1;Slc6a4
GO:0005451	monovalent cation:proton antiporter activity	2	10	0.180094	0.774124	360539;317170	Slc47a1;Slc9a7
GO:0048407	platelet-derived growth factor binding	2	10	0.180094	0.774124	84032;29393	Col3a1;Col1a1
GO:0008047	enzyme activator activity	23	266	0.180746	0.774124	302976;25728;192213;24832;117038;54296;25542;25425;29569;361442;315298;310621;81707;360228;288589;289076;24482;54289;287562;306279;114097;282838;684050	Noxo1;Apoe;Rasgrf1;Thy1;Mt3;Rgs7;Ccl3;Ctsh;Pcolce;Sipa1l2;Racgap1;Iqgap3;Mmp14;Wfdc21;Rasa4;Rgs18;Igf1;Rgs1;Ccl12;Arhgap22;Ltc4s;Gm2a;PCOLCE2
GO:0005509	calcium ion binding	39	478	0.183162	0.779612	58962;393092;171394;59267;65199;690625;25503;117033;25017;304608;306283;306071;114587;259243;26989;29692;292406;296184;292699;29427;65048;65049;81707;306081;114122;63849;304334;362107;362510;312705;54282;192249;298185;192262;29244;266807;245918;303130;316521	Hpgds;Pcdhac2;Clstn2;Syt7;Kcnip3;Oc90;Ocm2;Mmp12;Myo5a;Mmp19;Anxa8;Lcp1;Dlk1;Kcnip4;Cadps;Pla2g2a;Thbs2;Ankef1;Cblc;Aif1;Fat2;Megf6;Mmp14;Pcdh20;Vcan;Mmp8;Fam20c;Aif1l;Melk;C1r;Padi1;Ehd3;Frem1;C1s;Gch1;Duox1;Cgref1;Fstl4;Vil1
GO:0032934	sterol binding	3	20	0.184009	0.779612	25557;192211;679975	Star;Prom2;Gpr183
GO:0042626	ATPase activity, coupled to transmembrane movement of substances	8	77	0.184692	0.779612	288026;24891;29599;24212;24213;170913;685232;29639	Atp13a4;Abcb4;Atp2b3;Atp1a2;Atp1a3;Abcb1a;Atp6v1a;Fxyd2
GO:0005158	insulin receptor binding	4	31	0.188738	0.792878	306760;498898;24482;290361	Dok3;Dok6;Igf1;Dok2
GO:0043492	ATPase activity, coupled to movement of substances	8	78	0.192927	0.80662	288026;24891;29599;24212;24213;170913;685232;29639	Atp13a4;Abcb4;Atp2b3;Atp1a2;Atp1a3;Abcb1a;Atp6v1a;Fxyd2
GO:0015370	solute:sodium symporter activity	5	43	0.197881	0.818613	84012;50676;298340;24777;25553	Slc1a6;Slc6a12;Slc6a14;Slc10a1;Slc6a4
GO:0019825	oxygen binding	3	21	0.20085	0.818613	24787;24299;54246	Sod2;Cyp2a3;Cyp2f4
GO:0009881	photoreceptor activity	2	11	0.204187	0.818613	498289;365901	Opn3;Gnat2
GO:0016493	C-C chemokine receptor activity	2	11	0.204187	0.818613	301066;117029	Ccr8;Ccr5
GO:0008157	protein phosphatase 1 binding	2	11	0.204187	0.818613	307472;311167	Sh3rf2;Smtnl1
GO:0070402	NADPH binding	2	11	0.204187	0.818613	24950;50671	Srd5a1;Fasn
GO:0008301	DNA binding, bending	2	11	0.204187	0.818613	691657;360243	Crip1;Top2a
GO:0031432	titin binding	2	11	0.204187	0.818613	140939;316330	Trim63;Ankrd23
GO:0004806	triglyceride lipase activity	2	11	0.204187	0.818613	291437;25330	Lipg;Lipe
GO:0000980	RNA polymerase II distal enhancer sequence-specific DNA binding	5	44	0.209527	0.834123	312897;292301;58940;366126;299210	Msc;T;H2afz;Spi1;Esrrb
GO:0016829	lyase activity	12	130	0.210077	0.834123	24191;81726;171142;50671;286896;297814;29242;304860;114097;24333;24962;305509	Aldoc;Mvd;Lbp;Fasn;Sgpl1;Car8;Car4;Npl;Ltc4s;Eno1;Cth;Adcy1
GO:0016597	amino acid binding	10	105	0.211503	0.834123	365377;191573;24599;293154;59103;114097;81869;24848;171049;84493	Trim72;Grin3a;Nos2;Folr2;Ptges;Ltc4s;Gstm7;Tph1;Folr1;Fmo3
GO:0022890	inorganic cation transmembrane transporter activity	33	407	0.215314	0.834123	293650;170899;29599;684516;24213;65199;317170;84012;259243;298340;29465;100909725;315611;83731;29639;24777;360539;191573;116649;24212;50599;116745;25349;25553;297932;25364;685232;365391;306009;50676;29571;116695;64120	Tcirg1;Kcnk2;Atp2b3;Kcnc4;Atp1a3;Kcnip3;Slc9a7;Slc1a6;Kcnip4;Slc6a14;Trpv2;LOC100909725;Scn4b;Kcnma1;Fxyd2;Slc10a1;Slc47a1;Grin3a;Kcnj4;Atp1a2;Kcnj3;Kcnh6;Scn2b;Slc6a4;Atp6v0d2;Asic2;Atp6v1a;Trpm5;Slc39a14;Slc6a12;Scn10a;Kcnd1;Kcnk13
GO:0022891	substrate-specific transmembrane transporter activity	54	692	0.217169	0.834123	293650;406864;170899;29599;684516;24213;65199;25364;80900;317170;84012;50719;259243;298340;29465;29695;362861;100909725;315611;300027;24904;83731;29639;25753;24777;360539;63848;50592;63997;191573;60338;116649;24212;50599;116745;25349;83509;25553;297932;25027;685232;365391;310392;306009;50676;314847;29571;288026;29440;116695;64120;116831;81658;24778	Tcirg1;Clic1;Kcnk2;Atp2b3;Kcnc4;Atp1a3;Kcnip3;Asic2;Slco1a5;Slc9a7;Slc1a6;Slc7a5;Kcnip4;Slc6a14;Trpv2;Gabrr2;Slc41a2;LOC100909725;Scn4b;Gpihbp1;Slc22a1;Kcnma1;Fxyd2;Chrng;Slc10a1;Slc47a1;Fxyd7;Gria1;Slc29a1;Grin3a;Fxyd5;Kcnj4;Atp1a2;Kcnj3;Kcnh6;Scn2b;Slc7a7;Slc6a4;Atp6v0d2;Slc16a1;Atp6v1a;Trpm5;Slc7a11;Slc39a14;Slc6a12;Best3;Scn10a;Atp13a4;Slc26a4;Kcnd1;Kcnk13;Fxyd3;Gabrp;Slc2a1
GO:0016787	hydrolase activity	135	1812	0.217179	0.834123	64576;298282;29599;113901;29213;84387;316077;24310;288079;246118;25335;29692;54269;497009;85266;29290;63865;365042;305253;294257;360243;311406;191575;66015;312705;54282;292848;289997;89788;50671;294286;89784;290757;252929;81639;24434;363781;292306;266758;81707;293676;298512;25686;83799;288026;361527;691603;79126;291885;24375;29728;361993;116680;81743;29639;25425;289993;63849;89824;282838;25732;10…	Ptprv;Oma1;Atp2b3;Chia;Tubb4a;Pglyrp1;Entpd3;Ace;Polq;Tubb3;Mmp7;Pla2g2a;Mcpt10;Naaa;Prss12;Adora1;Lgmn;Rab32;Adamts3;Cfb;Top2a;Dusp2;Nme1;Adamts4;C1r;Padi1;Klk13;Dlgap5;Gna15;Fasn;Kifc1;Idi1;F11;Ctsz;Alox15;Gusb;Plcxd2;Rnaset2;Sec11c;Mmp14;Ctsw;Rhbdl2;Gnai1;Dpp7;Atp13a4;Pld3;LOC691603;Cfi;Mcm5;Fuca1;Mcm4;Them5;Ptpru;Pde2a;Fxyd2;Ctsh;Cdkn3;Mmp8;Chi3l1;Gm2a;Acp5;Mcpt1l1;Arg1;Tubb2b;Vnn3;Cma1;Espl1…
GO:0005544	calcium-dependent phospholipid binding	3	22	0.218032	0.834123	59267;306283;81820	Syt7;Anxa8;Doc2b
GO:0017147	Wnt-protein binding	3	22	0.218032	0.834123	364754;295691;282836	Fzd8;Frzb;Cthrc1
GO:0022829	wide pore channel activity	3	22	0.218032	0.834123	29584;79217;24392	Gjb1;Gja3;Gja1
GO:0016702	oxidoreductase activity, acting on single donors with incorporation of molecular oxygen, incorporation of two atoms of oxygen	3	22	0.218032	0.834123	81639;81718;287424	Alox15;Cdo1;Aloxe3
GO:0003774	motor activity	8	81	0.218506	0.834123	293502;171304;294286;361308;171529;309523;266714;25017	Kif22;Kif11;Kifc1;Kif20a;Kif2c;Kif20b;Myo7a;Myo5a
GO:0022843	voltage-gated cation channel activity	11	119	0.221759	0.842876	684516;25349;170899;29571;116649;50599;116745;315611;116695;83731;25364	Kcnc4;Scn2b;Kcnk2;Scn10a;Kcnj4;Kcnj3;Kcnh6;Scn4b;Kcnd1;Kcnma1;Asic2
GO:0000146	microfilament motor activity	2	12	0.228598	0.850463	266714;25017	Myo7a;Myo5a
GO:0016813	hydrolase activity, acting on carbon-nitrogen (but not peptide) bonds, in linear amidines	2	12	0.228598	0.850463	29221;54282	Arg1;Padi1
GO:0008198	ferrous iron binding	2	12	0.228598	0.850463	81718;25732	Cdo1;Acp5
GO:0015929	hexosaminidase activity	2	12	0.228598	0.850463	367166;282838	Hyal1;Gm2a
GO:0030169	low-density lipoprotein particle binding	2	12	0.228598	0.850463	498638;114122	Msr1;Vcan
GO:0030145	manganese ion binding	4	34	0.230055	0.852271	24649;29221;24787;89784	Pim1;Arg1;Sod2;Idi1
GO:0070851	growth factor receptor binding	10	108	0.234461	0.861533	362076;24498;60582;83504;315691;25046;25453;64536;292699;24493	Il36b;Il6;Il1rn;Kl;Lingo1;Pigr;Gdnf;Esm1;Cblc;Il1a
GO:0016701	oxidoreductase activity, acting on single donors with incorporation of molecular oxygen	3	23	0.235499	0.861533	81639;81718;287424	Alox15;Cdo1;Aloxe3
GO:0001968	fibronectin binding	3	23	0.235499	0.861533	29175;50654;81687	Ctsk;Ctss;Mmp9
GO:0022892	substrate-specific transporter activity	61	795	0.23739	0.862231	293650;406864;170899;29599;684516;24213;65199;25364;315215;80900;25728;84012;50719;259243;298340;29465;29695;362861;100909725;300027;315611;65046;24904;83731;29639;317170;24777;360539;63848;50592;58966;63997;191573;60338;116649;24212;50599;116745;25557;25349;83509;25553;297932;298504;25027;685232;365391;310392;306009;50676;25753;314847;29571;288026;29440;116695;64120;116831;282838;81658;24778	Tcirg1;Clic1;Kcnk2;Atp2b3;Kcnc4;Atp1a3;Kcnip3;Asic2;Mlc1;Slco1a5;Apoe;Slc1a6;Slc7a5;Kcnip4;Slc6a14;Trpv2;Gabrr2;Slc41a2;LOC100909725;Gpihbp1;Scn4b;Ap2s1;Slc22a1;Kcnma1;Fxyd2;Slc9a7;Slc10a1;Slc47a1;Fxyd7;Gria1;Ramp2;Slc29a1;Grin3a;Fxyd5;Kcnj4;Atp1a2;Kcnj3;Kcnh6;Star;Scn2b;Slc7a7;Slc6a4;Atp6v0d2;Mfsd2a;Slc16a1;Atp6v1a;Trpm5;Slc7a11;Slc39a14;Slc6a12;Chrng;Best3;Scn10a;Atp13a4;Slc26a4;Kcnd1;Kcnk13;Fx…
GO:0015631	tubulin binding	16	186	0.237654	0.862231	293502;24392;171304;311336;294286;291441;315298;191575;171529;361308;64041;308761;309523;680280;24383;25515	Kif22;Gja1;Kif11;Nusap1;Kifc1;Ska1;Racgap1;Nme1;Kif2c;Kif20a;Birc5;Prc1;Kif20b;Gas2l3;Gapdh;Plk1
GO:0001158	enhancer sequence-specific DNA binding	6	59	0.24385	0.87388	58940;366126;299210;312897;140586;292301	H2afz;Spi1;Esrrb;Msc;Sox9;T
GO:0051287	NAD binding	6	59	0.24385	0.87388	24383;79242;24533;58835;54349;24479	Gapdh;Hpgd;Ldha;Phgdh;Aox1;Idh1
GO:0048306	calcium-dependent protein binding	6	59	0.24385	0.87388	100911545;84510;25651;60566;65199;25017	LOC100911545;Stmn2;Selp;Syt8;Kcnip3;Myo5a
GO:0004197	cysteine-type endopeptidase activity	5	47	0.245679	0.876853	29175;25425;50654;63865;252929	Ctsk;Ctsh;Ctss;Lgmn;Ctsz
GO:0015125	bile acid transmembrane transporter activity	2	13	0.253185	0.878679	80900;24777	Slco1a5;Slc10a1
GO:0004890	GABA-A receptor activity	2	13	0.253185	0.878679	29695;81658	Gabrr2;Gabrp
GO:0035173	histone kinase activity	2	13	0.253185	0.878679	54237;25203	Cdk1;Ccnb1
GO:0016863	intramolecular oxidoreductase activity, transposing C=C bonds	2	13	0.253185	0.878679	89784;171142	Idi1;Lbp
GO:0016894	endonuclease activity, active with either ribo- or deoxyribonucleic acids and producing 3'-phosphomonoesters	2	13	0.253185	0.878679	298884;292306	Gen1;Rnaset2
GO:0047617	acyl-CoA hydrolase activity	2	13	0.253185	0.878679	50559;361993	Acot1;Them5
GO:0005343	organic acid:sodium symporter activity	3	24	0.253196	0.878679	84012;50676;24777	Slc1a6;Slc6a12;Slc10a1
GO:0005319	lipid transporter activity	6	60	0.254818	0.880829	25728;25557;282838;298504;80900;24777	Apoe;Star;Gm2a;Mfsd2a;Slco1a5;Slc10a1
GO:0016712	oxidoreductase activity, acting on paired donors, with incorporation or reduction of molecular oxygen, reduced flavin or flavoprotein as one donor, and incorporation of one atom of oxygen	4	36	0.258729	0.885494	25086;24299;54246;266684	Cyp2e1;Cyp2a3;Cyp2f4;Cyp2d1
GO:0016830	carbon-carbon lyase activity	4	36	0.258729	0.885494	24191;81726;304860;286896	Aldoc;Mvd;Npl;Sgpl1
GO:0022836	gated channel activity	21	257	0.263936	0.885494	684516;259243;50592;365391;406864;315611;170899;29571;29695;64120;116649;50599;116745;191573;116695;65199;25349;83731;25364;81658;25753	Kcnc4;Kcnip4;Gria1;Trpm5;Clic1;Scn4b;Kcnk2;Scn10a;Gabrr2;Kcnk13;Kcnj4;Kcnj3;Kcnh6;Grin3a;Kcnd1;Kcnip3;Scn2b;Kcnma1;Asic2;Gabrp;Chrng
GO:0015171	amino acid transmembrane transporter activity	6	61	0.265917	0.885494	84012;50676;50719;83509;80900;310392	Slc1a6;Slc6a12;Slc7a5;Slc7a7;Slco1a5;Slc7a11
GO:0016651	oxidoreductase activity, acting on NAD(P)H	6	61	0.265917	0.885494	79129;24599;266807;66021;365345;364018	Cyba;Nos2;Duox1;Cybb;Cyb5r2;Ncf2
GO:0005249	voltage-gated potassium channel activity	7	74	0.270468	0.885494	684516;170899;116649;50599;116745;116695;83731	Kcnc4;Kcnk2;Kcnj4;Kcnj3;Kcnh6;Kcnd1;Kcnma1
GO:0001948	glycoprotein binding	7	74	0.270468	0.885494	25651;117029;24648;60379;29175;117258;50654	Selp;Ccr5;Serpina1;Col5a3;Ctsk;Cntn1;Ctss
GO:0004364	glutathione transferase activity	3	25	0.271071	0.885494	114097;81869;58962	Ltc4s;Gstm7;Hpgds
GO:0005261	cation channel activity	19	232	0.273863	0.885494	684516;259243;25349;315611;29465;170899;29571;100909725;116649;50599;116745;191573;116695;65199;64120;83731;25364;365391;25753	Kcnc4;Kcnip4;Scn2b;Scn4b;Trpv2;Kcnk2;Scn10a;LOC100909725;Kcnj4;Kcnj3;Kcnh6;Grin3a;Kcnd1;Kcnip3;Kcnk13;Kcnma1;Asic2;Trpm5;Chrng
GO:0004089	carbonate dehydratase activity	2	14	0.277821	0.885494	297814;29242	Car8;Car4
GO:0004745	retinol dehydrogenase activity	2	14	0.277821	0.885494	170635;259235	Dhrs9;Sdr9c7
GO:0030742	GTP-dependent protein binding	2	14	0.277821	0.885494	365042;29244	Rab32;Gch1
GO:0016646	oxidoreductase activity, acting on the CH-NH group of donors, NAD or NADP as acceptor	2	14	0.277821	0.885494	287877;680308	Pycr1;Mthfd2
GO:0015299	solute:proton antiporter activity	2	14	0.277821	0.885494	360539;317170	Slc47a1;Slc9a7
GO:0015405	P-P-bond-hydrolysis-driven transmembrane transporter activity	8	88	0.282452	0.885494	288026;24891;29599;24212;24213;170913;685232;29639	Atp13a4;Abcb4;Atp2b3;Atp1a2;Atp1a3;Abcb1a;Atp6v1a;Fxyd2
GO:0015399	primary active transmembrane transporter activity	8	88	0.282452	0.885494	288026;24891;29599;24212;24213;170913;685232;29639	Atp13a4;Abcb4;Atp2b3;Atp1a2;Atp1a3;Abcb1a;Atp6v1a;Fxyd2
GO:0008188	neuropeptide receptor activity	4	38	0.288043	0.885494	29235;24807;25033;246075	Galr3;Tacr1;Sstr1;Prlhr
GO:0015294	solute:cation symporter activity	6	63	0.288457	0.885494	84012;50676;298340;24778;25553;24777	Slc1a6;Slc6a12;Slc6a14;Slc2a1;Slc6a4;Slc10a1
GO:0001077	RNA polymerase II core promoter proximal region sequence-specific DNA binding transcription factor activity involved in positive regulation of transcription	12	141	0.288492	0.885494	296344;366126;25154;361514;29452;24883;140586;117232;304815;311723;24890;81819	Mybl2;Spi1;Pgr;Meis3;Epas1;Wt1;Sox9;Barhl1;Elf3;Sox18;Esr1;Pax8
GO:0035591	signaling adaptor activity	3	26	0.289075	0.885494	114203;81511;290361	Sh2b2;Lat;Dok2
GO:0046943	carboxylic acid transmembrane transporter activity	8	89	0.291975	0.885494	84012;50676;50719;83509;310392;25027;80900;24777	Slc1a6;Slc6a12;Slc7a5;Slc7a7;Slc7a11;Slc16a1;Slco1a5;Slc10a1
GO:0003924	GTPase activity	13	155	0.293919	0.885494	365042;89788;300218;307351;246118;25686;291081;29213;64626;100909441;500377;192249;365901	Rab32;Gna15;Tuba1c;Tubb6;Tubb3;Gnai1;Tubb2b;Tubb4a;Rem2;LOC100909441;Tuba8;Ehd3;Gnat2
GO:0008324	cation transmembrane transporter activity	38	496	0.297179	0.885494	293650;170899;29599;684516;24213;65199;317170;84012;259243;298340;29465;100909725;315611;24904;83731;29639;25753;24777;360539;191573;116649;24212;50599;116745;25349;25553;297932;25364;685232;365391;362861;306009;50676;29571;288026;116695;64120;24778	Tcirg1;Kcnk2;Atp2b3;Kcnc4;Atp1a3;Kcnip3;Slc9a7;Slc1a6;Kcnip4;Slc6a14;Trpv2;LOC100909725;Scn4b;Slc22a1;Kcnma1;Fxyd2;Chrng;Slc10a1;Slc47a1;Grin3a;Kcnj4;Atp1a2;Kcnj3;Kcnh6;Scn2b;Slc6a4;Atp6v0d2;Asic2;Atp6v1a;Trpm5;Slc41a2;Slc39a14;Slc6a12;Scn10a;Atp13a4;Kcnd1;Kcnk13;Slc2a1
GO:0015293	symporter activity	8	90	0.301575	0.885494	84012;50676;298340;24778;25553;298504;25027;24777	Slc1a6;Slc6a12;Slc6a14;Slc2a1;Slc6a4;Mfsd2a;Slc16a1;Slc10a1
GO:0016289	CoA hydrolase activity	2	15	0.302399	0.885494	50559;361993	Acot1;Them5
GO:0005070	SH3/SH2 adaptor activity	2	15	0.302399	0.885494	114203;81511	Sh2b2;Lat
GO:0015238	drug transmembrane transporter activity	2	15	0.302399	0.885494	360539;24891	Slc47a1;Abcb4
GO:0042813	Wnt-activated receptor activity	2	15	0.302399	0.885494	364754;295691	Fzd8;Frzb
GO:0005154	epidermal growth factor receptor binding	3	27	0.30716	0.885494	315691;25046;292699	Lingo1;Pigr;Cblc
GO:0051087	chaperone binding	5	52	0.308925	0.885494	24212;24213;64041;680945;24366	Atp1a2;Atp1a3;Birc5;Sdf2l1;Fgb
GO:0005342	organic acid transmembrane transporter activity	8	91	0.311243	0.885494	84012;50676;50719;83509;310392;25027;80900;24777	Slc1a6;Slc6a12;Slc7a5;Slc7a7;Slc7a11;Slc16a1;Slco1a5;Slc10a1
GO:0043177	organic acid binding	15	185	0.316168	0.885494	24599;365377;140868;191573;171049;25651;293154;84493;114097;81869;29637;24848;316521;25544;59103	Nos2;Trim72;Fabp5;Grin3a;Folr1;Selp;Folr2;Fmo3;Ltc4s;Gstm7;Hmgcs1;Tph1;Vil1;Sele;Ptges
GO:0016835	carbon-oxygen lyase activity	5	53	0.321867	0.885494	24333;297814;29242;50671;171142	Eno1;Car8;Car4;Fasn;Lbp
GO:0035326	enhancer binding	6	66	0.322944	0.885494	58940;366126;299210;312897;140586;292301	H2afz;Spi1;Esrrb;Msc;Sox9;T
GO:0030276	clathrin binding	3	28	0.325282	0.885494	59267;65178;60566	Syt7;Snap91;Syt8
GO:0015459	potassium channel regulator activity	3	28	0.325282	0.885494	170899;81639;65199	Kcnk2;Alox15;Kcnip3
GO:0016917	GABA receptor activity	2	16	0.326822	0.885494	29695;81658	Gabrr2;Gabrp
GO:0004128	cytochrome-b5 reductase activity, acting on NAD(P)H	1	5	0.3308	0.885494	365345	Cyb5r2
GO:0004031	aldehyde oxidase activity	1	5	0.3308	0.885494	54349	Aox1
GO:0030151	molybdenum ion binding	1	5	0.3308	0.885494	690745	2020-03-01
GO:0047498	calcium-dependent phospholipase A2 activity	1	5	0.3308	0.885494	29692	Pla2g2a
GO:0003680	AT DNA binding	1	5	0.3308	0.885494	691657	Crip1
GO:0004957	prostaglandin E receptor activity	1	5	0.3308	0.885494	79242	Hpgd
GO:0004634	phosphopyruvate hydratase activity	1	5	0.3308	0.885494	24333	Eno1
GO:0008020	G-protein coupled photoreceptor activity	1	5	0.3308	0.885494	365901	Gnat2
GO:0008035	high-density lipoprotein particle binding	1	5	0.3308	0.885494	300027	Gpihbp1
GO:0071253	connexin binding	1	5	0.3308	0.885494	24392	Gja1
GO:0019957	C-C chemokine binding	1	5	0.3308	0.885494	117029	Ccr5
GO:0051379	epinephrine binding	1	5	0.3308	0.885494	25083	Adra2a
GO:0004936	alpha-adrenergic receptor activity	1	5	0.3308	0.885494	25083	Adra2a
GO:0030284	estrogen receptor activity	1	5	0.3308	0.885494	24890	Esr1
GO:0005035	death receptor activity	1	5	0.3308	0.885494	25572	Tnfrsf4
GO:0016725	oxidoreductase activity, acting on CH or CH2 groups	1	5	0.3308	0.885494	362720	Rrm2
GO:0035671	enone reductase activity	1	5	0.3308	0.885494	24950	Srd5a1
GO:0045545	syndecan binding	1	5	0.3308	0.885494	116640	Tnc
GO:0046790	virion binding	1	5	0.3308	0.885494	689388	Ptx3
GO:0004311	farnesyltranstransferase activity	1	5	0.3308	0.885494	83791	Fdps
GO:0008294	calcium- and calmodulin-responsive adenylate cyclase activity	1	5	0.3308	0.885494	305509	Adcy1
GO:0017040	ceramidase activity	1	5	0.3308	0.885494	313339	Acer2
GO:0016714	oxidoreductase activity, acting on paired donors, with incorporation or reduction of molecular oxygen, reduced pteridine as one donor, and incorporation of one atom of oxygen	1	5	0.3308	0.885494	24848	Tph1
GO:0004022	alcohol dehydrogenase (NAD) activity	1	5	0.3308	0.885494	170635	Dhrs9
GO:0016623	oxidoreductase activity, acting on the aldehyde or oxo group of donors, oxygen as acceptor	1	5	0.3308	0.885494	54349	Aox1
GO:0031685	adenosine receptor binding	1	5	0.3308	0.885494	29597	P2ry2
GO:0016803	ether hydrolase activity	1	5	0.3308	0.885494	81639	Alox15
GO:0034235	GPI anchor binding	1	5	0.3308	0.885494	24832	Thy1
GO:0003916	DNA topoisomerase activity	1	5	0.3308	0.885494	360243	Top2a
GO:0001618	virus receptor activity	1	5	0.3308	0.885494	679787	Clec5a
GO:0019238	cyclohydrolase activity	1	5	0.3308	0.885494	29244	Gch1
GO:0004668	protein-arginine deiminase activity	1	5	0.3308	0.885494	54282	Padi1
GO:0015185	gamma-aminobutyric acid transmembrane transporter activity	1	5	0.3308	0.885494	50676	Slc6a12
GO:0001727	lipid kinase activity	1	5	0.3308	0.885494	170897	Sphk1
GO:0016018	cyclosporin A binding	1	5	0.3308	0.885494	100360977	LOC100360977
GO:0016713	oxidoreductase activity, acting on paired donors, with incorporation or reduction of molecular oxygen, reduced iron-sulfur protein as one donor, and incorporation of one atom of oxygen	1	5	0.3308	0.885494	50549	Cyp4a1
GO:0004030	aldehyde dehydrogenase [NAD(P)+] activity	1	5	0.3308	0.885494	25375	Aldh3a1
GO:0008083	growth factor activity	10	120	0.333785	0.889586	64546;25453;81503;29455;289747;116510;192211;24498;29200;24482	Il12b;Gdnf;Cxcl1;Gdf15;Osm;Timp1;Prom2;Il6;Inhba;Igf1
GO:0004177	aminopeptidase activity	3	29	0.3434	0.889586	83799;290757;25425	Dpp7;F11;Ctsh
GO:0008235	metalloexopeptidase activity	3	29	0.3434	0.889586	54242;113936;296156	Cpa3;Cpb2;Cpxm1
GO:0001046	core promoter sequence-specific DNA binding	5	55	0.347912	0.889586	81819;140586;24890;58940;366126	Pax8;Sox9;Esr1;H2afz;Spi1
GO:0042169	SH2 domain binding	3	30	0.361474	0.889586	317676;25316;364648	Lat2;Ms4a2;Shcbp1
GO:0033613	activating transcription factor binding	4	43	0.362742	0.889586	292301;79431;155430;114090	T;Bhlhe40;Hey2;Egr2
GO:0042803	protein homodimerization activity	44	597	0.36665	0.889586	64557;25728;25334;29584;25054;79431;117254;24333;360243;25503;81726;293504;361623;81869;29637;315615;81743;83731;170496;24599;24451;24479;64546;58962;25339;50592;24904;56765;25453;25553;25027;287059;24171;50671;83783;29687;29244;64041;25083;24464;362235;266714;316521;498840	Bard1;Apoe;Bhlha15;Gjb1;Ntrk2;Bhlhe40;Prdx1;Eno1;Top2a;Ocm2;Mvd;Qprt;Trim66;Gstm7;Hmgcs1;Dscaml1;Pde2a;Kcnma1;Lcn2;Nos2;Hmox1;Idh1;Il12b;Hpgds;Npr3;Gria1;Slc22a1;Plvap;Gdnf;Slc6a4;Slc16a1;RGD1565166;Add2;Fasn;Sult1a1;C1qb;Gch1;Birc5;Adra2a;Hp;Syndig1;Myo7a;Vil1;Tmem173
GO:0004716	receptor signaling protein tyrosine kinase activity	1	6	0.374133	0.889586	89804	Tek
GO:0008603	cAMP-dependent protein kinase regulator activity	1	6	0.374133	0.889586	24599	Nos2
GO:0031698	beta-2 adrenergic receptor binding	1	6	0.374133	0.889586	50592	Gria1
GO:0019958	C-X-C chemokine binding	1	6	0.374133	0.889586	100911545	LOC100911545
GO:0004551	nucleotide diphosphatase activity	1	6	0.374133	0.889586	54410	Enpp3
GO:0016494	C-X-C chemokine receptor activity	1	6	0.374133	0.889586	100124593	Cxcr6
GO:0016721	oxidoreductase activity, acting on superoxide radicals as acceptor	1	6	0.374133	0.889586	24787	Sod2
GO:0003958	NADPH-hemoprotein reductase activity	1	6	0.374133	0.889586	24599	Nos2
GO:0035005	1-phosphatidylinositol-4-phosphate 3-kinase activity	1	6	0.374133	0.889586	116720	Pik3c2g
GO:0005351	sugar:proton symporter activity	1	6	0.374133	0.889586	24778	Slc2a1
GO:0016723	oxidoreductase activity, oxidizing metal ions, NAD or NADP as acceptor	1	6	0.374133	0.889586	170824	Steap3
GO:0003997	acyl-CoA oxidase activity	1	6	0.374133	0.889586	296138	Acoxl
GO:0008508	bile acid:sodium symporter activity	1	6	0.374133	0.889586	24777	Slc10a1
GO:0005381	iron ion transmembrane transporter activity	1	6	0.374133	0.889586	306009	Slc39a14
GO:0005402	cation:sugar symporter activity	1	6	0.374133	0.889586	24778	Slc2a1
GO:0047035	testosterone dehydrogenase (NAD+) activity	1	6	0.374133	0.889586	170635	Dhrs9
GO:0035473	lipase binding	1	6	0.374133	0.889586	300027	Gpihbp1
GO:0004448	isocitrate dehydrogenase activity	1	6	0.374133	0.889586	24479	Idh1
GO:0004300	enoyl-CoA hydratase activity	1	6	0.374133	0.889586	171142	Lbp
GO:0016670	oxidoreductase activity, acting on a sulfur group of donors, oxygen as acceptor	1	6	0.374133	0.889586	84491	Qsox1
GO:0004784	superoxide dismutase activity	1	6	0.374133	0.889586	24787	Sod2
GO:0030547	receptor inhibitor activity	1	6	0.374133	0.889586	60582	Il1rn
GO:0016889	endodeoxyribonuclease activity, producing 3'-phosphomonoesters	1	6	0.374133	0.889586	298884	Gen1
GO:0022821	potassium ion antiporter activity	1	6	0.374133	0.889586	317170	Slc9a7
GO:0008239	dipeptidyl-peptidase activity	1	6	0.374133	0.889586	83799	Dpp7
GO:0022834	ligand-gated channel activity	9	111	0.3743	0.889586	25753;50592;191573;116649;50599;116745;29695;25364;81658	Chrng;Gria1;Grin3a;Kcnj4;Kcnj3;Kcnh6;Gabrr2;Asic2;Gabrp
GO:0015276	ligand-gated ion channel activity	9	111	0.3743	0.889586	25753;50592;191573;116649;50599;116745;29695;25364;81658	Chrng;Gria1;Grin3a;Kcnj4;Kcnj3;Kcnh6;Gabrr2;Asic2;Gabrp
GO:0050998	nitric-oxide synthase binding	2	18	0.374882	0.889586	24599;25553	Nos2;Slc6a4
GO:0016878	acid-thiol ligase activity	2	18	0.374882	0.889586	311569;113976	Acss2;Acsl4
GO:0016864	intramolecular oxidoreductase activity, transposing S-S bonds	2	18	0.374882	0.889586	100362805;84491	Txndc5;Qsox1
GO:0090484	drug transporter activity	2	18	0.374882	0.889586	360539;24891	Slc47a1;Abcb4
GO:0003756	protein disulfide isomerase activity	2	18	0.374882	0.889586	100362805;84491	Txndc5;Qsox1
GO:0005234	extracellular-glutamate-gated ion channel activity	2	18	0.374882	0.889586	191573;50592	Grin3a;Gria1
GO:0043236	laminin binding	2	18	0.374882	0.889586	83781;50654	Lgals3;Ctss
GO:0017075	syntaxin-1 binding	2	18	0.374882	0.889586	25017;25553	Myo5a;Slc6a4
GO:0008094	DNA-dependent ATPase activity	4	44	0.37773	0.893639	288079;29728;360243;499870	Polq;Mcm4;Top2a;Rad51
GO:0022839	ion gated channel activity	3	31	0.379469	0.893639	25364;365391;83731	Asic2;Trpm5;Kcnma1
GO:0043168	anion binding	142	1996	0.3895	0.893639	29597;89813;140868;293154;29599;29213;302976;24310;245920;81726;353250;286896;246118;315298;29692;81869;289185;29610;24962;24848;84492;84493;498840;498335;89804;360243;294071;191573;117558;362510;191575;24770;25515;83620;89788;50671;25544;83783;294286;60450;81639;25589;25728;25059;501854;24834;25054;54237;59267;365377;365298;25686;29230;288026;291885;29728;117099;81743;288504;116720;63843;113976;…	P2ry2;Pdk4;Fabp5;Folr2;Atp2b3;Tubb4a;Noxo1;Ace;Cxcl10;Mvd;Niacr1;Sgpl1;Tubb3;Racgap1;Pla2g2a;Gstm7;Creg1;Tgfbr3;Cth;Tph1;Tec;Fmo3;Tmem173;Cxcl13;Tek;Top2a;Hells;Grin3a;Mylk2;Melk;Nme1;Ccl2;Plk1;Cit;Gna15;Fasn;Sele;Sult1a1;Kifc1;Matk;Alox15;Kdr;Apoe;Hk2;Rab7b;Tk1;Ntrk2;Cdk1;Syt7;Trim72;Alpk3;Gnai1;Sqle;Atp13a4;Mcm5;Mcm4;Bdh1;Pde2a;Snx8;Pik3c2g;P2ry4;Acsl4;Cdc6;Fmo2;Nlrp1b;Tubb2b;Pf4;Cybb;Ccl7;Acta…
GO:0031406	carboxylic acid binding	14	182	0.391907	0.893639	24599;365377;140868;191573;171049;25651;293154;84493;114097;81869;24848;316521;25544;59103	Nos2;Trim72;Fabp5;Grin3a;Folr1;Selp;Folr2;Fmo3;Ltc4s;Gstm7;Tph1;Vil1;Sele;Ptges
GO:0019200	carbohydrate kinase activity	2	19	0.398387	0.893639	25060;25059	Hk3;Hk2
GO:0015485	cholesterol binding	2	19	0.398387	0.893639	25557;192211	Star;Prom2
GO:0019239	deaminase activity	2	19	0.398387	0.893639	25383;683570	Apobec1;Gnpda1
GO:0031690	adrenergic receptor binding	2	19	0.398387	0.893639	50592;25083	Gria1;Adra2a
GO:0045296	cadherin binding	2	19	0.398387	0.893639	60338;24599	Fxyd5;Nos2
GO:0043015	gamma-tubulin binding	2	19	0.398387	0.893639	315298;191575	Racgap1;Nme1
GO:0016645	oxidoreductase activity, acting on the CH-NH group of donors	2	19	0.398387	0.893639	287877;680308	Pycr1;Mthfd2
GO:0004970	ionotropic glutamate receptor activity	2	19	0.398387	0.893639	191573;50592	Grin3a;Gria1
GO:0003823	antigen binding	5	59	0.400203	0.893639	294269;50719;24988;688090;171569	RT1-Da;Slc7a5;RT1-M2;RT1-Bb;Spon2
GO:0046914	transition metal ion binding	77	1074	0.400429	0.893639	64557;83792;25154;299210;24834;56777;361303;25335;360772;64041;365377;84387;316129;246074;497672;24493;24890;25427;291597;81687;307472;117033;24649;293783;361623;690745;363790;81718;304608;54242;24299;54246;100362384;24848;170496;24599;303596;81707;689415;305253;287424;691657;691857;100360087;140939;292699;25732;66015;24883;113936;25383;24886;679837;24310;29221;54349;316326;266684;113910;311827;1…	Bard1;Scd;Pgr;Esrrb;Tk1;Adam1a;Lims2;Mmp7;Zfand2a;Birc5;Trim72;Pglyrp1;Uhrf1;Scd1;Brca1;Il1a;Esr1;Cyp51;Trim36;Mmp9;Sh3rf2;Mmp12;Pim1;Lpxn;Trim66;Marc1;Fbxo40;Cdo1;Mmp19;Cpa3;Cyp2a3;Cyp2f4;LOC100362384;Tph1;Lcn2;Nos2;March10;Mmp14;Mt2A;Adamts3;Aloxe3;Crip1;Pygo1;LOC100360087;Trim63;Cblc;Acp5;Adamts4;Wt1;Cpb2;Apobec1;Tbxas1;Adam12;Ace;Arg1;Aox1;Neurl3;Cyp2d1;Prnd;Adamtsl2;Mt3;Ftl1;Fasn;Cyp4a1;Cyp2…
GO:0001228	RNA polymerase II transcription regulatory region sequence-specific DNA binding transcription factor activity involved in positive regulation of transcription	14	184	0.406594	0.893639	687536;296344;25334;366126;25154;361514;29452;24883;140586;117232;304815;311723;24890;81819	Foxf1;Mybl2;Bhlha15;Spi1;Pgr;Meis3;Epas1;Wt1;Sox9;Barhl1;Elf3;Sox18;Esr1;Pax8
GO:0001206	RNA polymerase II distal enhancer sequence-specific DNA binding transcription factor activity involved in negative regulation of transcription	1	7	0.41466	0.893639	312897	Msc
GO:0004935	adrenergic receptor activity	1	7	0.41466	0.893639	25083	Adra2a
GO:0015651	quaternary ammonium group transmembrane transporter activity	1	7	0.41466	0.893639	24904	Slc22a1
GO:0051371	muscle alpha-actinin binding	1	7	0.41466	0.893639	309760	Mypn
GO:0047372	acylglycerol lipase activity	1	7	0.41466	0.893639	25330	Lipe
GO:0003988	acetyl-CoA C-acyltransferase activity	1	7	0.41466	0.893639	308100	Acat2
GO:0016892	endoribonuclease activity, producing 3'-phosphomonoesters	1	7	0.41466	0.893639	292306	Rnaset2
GO:0001609	G-protein coupled adenosine receptor activity	1	7	0.41466	0.893639	29290	Adora1
GO:0004679	AMP-activated protein kinase activity	1	7	0.41466	0.893639	301518	Prkag3
GO:0004415	hyalurononglucosaminidase activity	1	7	0.41466	0.893639	367166	Hyal1
GO:0005021	vascular endothelial growth factor-activated receptor activity	1	7	0.41466	0.893639	25589	Kdr
GO:0015280	ligand-gated sodium channel activity	1	7	0.41466	0.893639	25364	Asic2
GO:0017153	sodium:dicarboxylate symporter activity	1	7	0.41466	0.893639	84012	Slc1a6
GO:0070182	DNA polymerase binding	1	7	0.41466	0.893639	499870	Rad51
GO:0005113	patched binding	1	7	0.41466	0.893639	25203	Ccnb1
GO:0031821	G-protein coupled serotonin receptor binding	1	7	0.41466	0.893639	25686	Gnai1
GO:0004016	adenylate cyclase activity	1	7	0.41466	0.893639	305509	Adcy1
GO:0016801	hydrolase activity, acting on ether bonds	1	7	0.41466	0.893639	81639	Alox15
GO:0031957	very long-chain fatty acid-CoA ligase activity	1	7	0.41466	0.893639	113976	Acsl4
GO:0000983	RNA polymerase II core promoter sequence-specific DNA binding transcription factor activity	1	7	0.41466	0.893639	155430	Hey2
GO:0042056	chemoattractant activity	2	20	0.421469	0.893639	83781;25542	Lgals3;Ccl3
GO:0019905	syntaxin binding	4	47	0.422396	0.893639	59267;25017;81820;25553	Syt7;Myo5a;Doc2b;Slc6a4
GO:0000979	RNA polymerase II core promoter sequence-specific DNA binding	3	34	0.432651	0.893639	81819;58940;366126	Pax8;H2afz;Spi1
GO:0004715	non-membrane spanning protein tyrosine kinase activity	3	34	0.432651	0.893639	84492;60450;362510	Tec;Matk;Melk
GO:0051018	protein kinase A binding	3	34	0.432651	0.893639	360034;140586;50592	Myrip;Sox9;Gria1
GO:0003697	single-stranded DNA binding	4	48	0.437123	0.893639	29728;499870;191575;363227	Mcm4;Rad51;Nme1;Nabp1
GO:0016627	oxidoreductase activity, acting on the CH-CH group of donors	4	48	0.437123	0.893639	64191;24950;50671;296138	Dhcr7;Srd5a1;Fasn;Acoxl
GO:0005230	extracellular ligand-gated ion channel activity	5	62	0.439144	0.893639	191573;29695;81658;50592;25753	Grin3a;Gabrr2;Gabrp;Gria1;Chrng
GO:0005520	insulin-like growth factor binding	2	21	0.444084	0.893639	64536;65154	Esm1;Wisp1
GO:0015491	cation:cation antiporter activity	2	21	0.444084	0.893639	360539;317170	Slc47a1;Slc9a7
GO:0071837	HMG box domain binding	2	21	0.444084	0.893639	266813;114090	Prrx1;Egr2
GO:0030165	PDZ domain binding	8	105	0.449977	0.893639	83620;50592;24392;116649;29599;364754;29610;295691	Cit;Gria1;Gja1;Kcnj4;Atp2b3;Fzd8;Tgfbr3;Frzb
GO:0015296	anion:cation symporter activity	3	35	0.450016	0.893639	84012;50676;24777	Slc1a6;Slc6a12;Slc10a1
GO:0016247	channel regulator activity	7	91	0.450886	0.893639	170899;81639;315611;25349;65199;287106;29639	Kcnk2;Alox15;Scn4b;Scn2b;Kcnip3;Prss30;Fxyd2
GO:0016765	transferase activity, transferring alkyl or aryl (other than methyl) groups	4	49	0.451739	0.893639	114097;81869;83791;58962	Ltc4s;Gstm7;Fdps;Hpgds
GO:0015108	chloride transmembrane transporter activity	5	63	0.452002	0.893639	29695;29440;81658;406864;314847	Gabrr2;Slc26a4;Gabrp;Clic1;Best3
GO:0016861	intramolecular oxidoreductase activity, interconverting aldoses and ketoses	1	8	0.452563	0.893639	683570	Gnpda1
GO:0051010	microtubule plus-end binding	1	8	0.452563	0.893639	171529	Kif2c
GO:0016722	oxidoreductase activity, oxidizing metal ions	1	8	0.452563	0.893639	170824	Steap3
GO:0008327	methyl-CpG binding	1	8	0.452563	0.893639	316129	Uhrf1
GO:0003857	3-hydroxyacyl-CoA dehydrogenase activity	1	8	0.452563	0.893639	171142	Lbp
GO:0016634	oxidoreductase activity, acting on the CH-CH group of donors, oxygen as acceptor	1	8	0.452563	0.893639	296138	Acoxl
GO:0005313	L-glutamate transmembrane transporter activity	1	8	0.452563	0.893639	84012	Slc1a6
GO:0008271	secondary active sulfate transmembrane transporter activity	1	8	0.452563	0.893639	29440	Slc26a4
GO:0015172	acidic amino acid transmembrane transporter activity	1	8	0.452563	0.893639	84012	Slc1a6
GO:0004972	N-methyl-D-aspartate selective glutamate receptor activity	1	8	0.452563	0.893639	191573	Grin3a
GO:0043121	neurotrophin binding	1	8	0.452563	0.893639	25054	Ntrk2
GO:0008195	phosphatidate phosphatase activity	1	8	0.452563	0.893639	309014	Ppapdc1a
GO:0048018	receptor agonist activity	1	8	0.452563	0.893639	498335	Cxcl13
GO:0047429	nucleoside-triphosphate diphosphatase activity	1	8	0.452563	0.893639	54410	Enpp3
GO:0043008	ATP-dependent protein binding	1	8	0.452563	0.893639	25017	Myo5a
GO:0005388	calcium-transporting ATPase activity	1	8	0.452563	0.893639	29599	Atp2b3
GO:0005523	tropomyosin binding	1	8	0.452563	0.893639	58814	Tmod2
GO:0017111	nucleoside-triphosphatase activity	35	492	0.463363	0.893639	500377;29599;24212;24213;29213;170913;316077;25017;24891;293502;171304;291885;246118;29728;288079;29639;365901;365042;171529;360243;361308;100909441;685232;192249;89788;25686;300218;307351;294286;291081;288026;309523;266714;64626;499870	Tuba8;Atp2b3;Atp1a2;Atp1a3;Tubb4a;Abcb1a;Entpd3;Myo5a;Abcb4;Kif22;Kif11;Mcm5;Tubb3;Mcm4;Polq;Fxyd2;Gnat2;Rab32;Kif2c;Top2a;Kif20a;LOC100909441;Atp6v1a;Ehd3;Gna15;Gnai1;Tuba1c;Tubb6;Kifc1;Tubb2b;Atp13a4;Kif20b;Myo7a;Rem2;Rad51
GO:0003678	DNA helicase activity	2	22	0.466197	0.893639	29728;291885	Mcm4;Mcm5
GO:0030507	spectrin binding	2	22	0.466197	0.893639	266714;24171	Myo7a;Add2
GO:0016814	hydrolase activity, acting on carbon-nitrogen (but not peptide) bonds, in cyclic amidines	2	22	0.466197	0.893639	29244;25383	Gch1;Apobec1
GO:0004623	phospholipase A2 activity	2	22	0.466197	0.893639	690625;29692	Oc90;Pla2g2a
GO:0008200	ion channel inhibitor activity	2	22	0.466197	0.893639	170899;81639	Kcnk2;Alox15
GO:0005179	hormone activity	8	107	0.469718	0.893639	316842;25653;24476;29200;58812;81712;25569;24482	Metrnl;Tshb;Iapp;Inhba;Apln;Retnla;Trh;Igf1
GO:0008013	beta-catenin binding	4	51	0.480577	0.893639	116680;24599;140586;24890	Ptpru;Nos2;Sox9;Esr1
GO:0016811	hydrolase activity, acting on carbon-nitrogen (but not peptide) bonds, in linear amides	4	51	0.480577	0.893639	313339;498992;84387;302972	Acer2;Vnn3;Pglyrp1;Amdhd2
GO:0016903	oxidoreductase activity, acting on the aldehyde or oxo group of donors	3	37	0.484059	0.893639	24383;54349;25375	Gapdh;Aox1;Aldh3a1
GO:0003684	damaged DNA binding	3	37	0.484059	0.893639	497672;499870;500987	Brca1;Rad51;H2afx
GO:0002020	protease binding	6	80	0.486073	0.893639	100911545;25308;116510;66015;24648;170496	LOC100911545;Cstb;Timp1;Adamts4;Serpina1;Lcn2
GO:0050699	WW domain binding	2	23	0.487776	0.893639	65161;309523	Litaf;Kif20b
GO:0043425	bHLH transcription factor binding	2	23	0.487776	0.893639	140586;79431	Sox9;Bhlhe40
GO:0016831	carboxy-lyase activity	2	23	0.487776	0.893639	81726;286896	Mvd;Sgpl1
GO:0016769	transferase activity, transferring nitrogenous groups	2	23	0.487776	0.893639	24383;29592	Gapdh;Bcat1
GO:0070628	proteasome binding	1	9	0.488012	0.893639	29168	Ubd
GO:0008656	cysteine-type endopeptidase activator activity involved in apoptotic process	1	9	0.488012	0.893639	25425	Ctsh
GO:0008574	plus-end-directed microtubule motor activity	1	9	0.488012	0.893639	171304	Kif11
GO:0005237	inhibitory extracellular ligand-gated ion channel activity	1	9	0.488012	0.893639	29695	Gabrr2
GO:0070696	transmembrane receptor protein serine/threonine kinase binding	1	9	0.488012	0.893639	29200	Inhba
GO:0035256	G-protein coupled glutamate receptor binding	1	9	0.488012	0.893639	24890	Esr1
GO:0004535	poly(A)-specific ribonuclease activity	1	9	0.488012	0.893639	310395	Ccr4
GO:0004312	fatty acid synthase activity	1	9	0.488012	0.893639	50671	Fasn
GO:0016303	1-phosphatidylinositol-3-kinase activity	1	9	0.488012	0.893639	116720	Pik3c2g
GO:0004467	long-chain fatty acid-CoA ligase activity	1	9	0.488012	0.893639	113976	Acsl4
GO:0017166	vinculin binding	1	9	0.488012	0.893639	308709	Synm
GO:0003993	acid phosphatase activity	1	9	0.488012	0.893639	25732	Acp5
GO:0004653	polypeptide N-acetylgalactosaminyltransferase activity	1	9	0.488012	0.893639	83627	Galnt5
GO:0004029	aldehyde dehydrogenase (NAD) activity	1	9	0.488012	0.893639	25375	Aldh3a1
GO:0019864	IgG binding	1	9	0.488012	0.893639	289211	Fcgr2b
GO:0008762	UDP-N-acetylmuramate dehydrogenase activity	1	9	0.488012	0.893639	54349	Aox1
GO:0030492	hemoglobin binding	1	9	0.488012	0.893639	24464	Hp
GO:0072349	modified amino acid transmembrane transporter activity	1	9	0.488012	0.893639	80900	Slco1a5
GO:0005283	sodium:amino acid symporter activity	1	9	0.488012	0.893639	50676	Slc6a12
GO:0003796	lysozyme activity	1	9	0.488012	0.893639	688047	Lyz2
GO:0015385	sodium:proton antiporter activity	1	9	0.488012	0.893639	317170	Slc9a7
GO:0016405	CoA-ligase activity	1	9	0.488012	0.893639	311569	Acss2
GO:0005254	chloride channel activity	4	52	0.494771	0.893639	29695;314847;81658;406864	Gabrr2;Best3;Gabrp;Clic1
GO:0001047	core promoter binding	6	81	0.497411	0.893639	81819;58940;366126;314818;140586;24890	Pax8;H2afz;Spi1;E2f7;Sox9;Esr1
GO:0035254	glutamate receptor binding	3	38	0.500696	0.893639	362235;24890;192213	Syndig1;Esr1;Rasgrf1
GO:0030695	GTPase regulator activity	12	168	0.501085	0.893639	83620;293693;306279;361442;288589;24832;315298;54296;289076;192213;54289;310621	Cit;Cdc42bpg;Arhgap22;Sipa1l2;Rasa4;Thy1;Racgap1;Rgs7;Rgs18;Rasgrf1;Rgs1;Iqgap3
GO:0016817	hydrolase activity, acting on acid anhydrides	38	544	0.502763	0.893639	500377;29599;24212;24213;29213;170913;316077;25017;24891;307415;293502;171304;291885;246118;29728;288079;117596;29639;365901;365042;171529;360243;361308;100909441;685232;192249;89788;25686;300218;307351;294286;291081;288026;309523;266714;64626;499870;54410	Tuba8;Atp2b3;Atp1a2;Atp1a3;Tubb4a;Abcb1a;Entpd3;Myo5a;Abcb4;RGD1309362;Kif22;Kif11;Mcm5;Tubb3;Mcm4;Polq;Atp6v1b2;Fxyd2;Gnat2;Rab32;Kif2c;Top2a;Kif20a;LOC100909441;Atp6v1a;Ehd3;Gna15;Gnai1;Tuba1c;Tubb6;Kifc1;Tubb2b;Atp13a4;Kif20b;Myo7a;Rem2;Rad51;Enpp3
GO:0000287	magnesium ion binding	11	154	0.504744	0.893639	58962;293693;360243;170897;289777;89784;191575;24333;680308;360161;24479	Hpgds;Cdc42bpg;Top2a;Sphk1;Fignl1;Idi1;Nme1;Eno1;Mthfd2;Nek6;Idh1
GO:0004864	protein phosphatase inhibitor activity	2	24	0.508799	0.893639	307472;259225	Sh3rf2;Ppp1r14b
GO:0015298	solute:cation antiporter activity	2	24	0.508799	0.893639	360539;317170	Slc47a1;Slc9a7
GO:0016248	channel inhibitor activity	2	24	0.508799	0.893639	170899;81639	Kcnk2;Alox15
GO:0030544	Hsp70 protein binding	2	24	0.508799	0.893639	81726;54237	Mvd;Cdk1
GO:0005227	calcium activated cation channel activity	2	24	0.508799	0.893639	365391;83731	Trpm5;Kcnma1
GO:0042805	actinin binding	2	24	0.508799	0.893639	309760;24915	Mypn;Pdlim4
GO:0030674	protein binding, bridging	5	68	0.514866	0.893639	290361;24367;24366;81511;114203	Dok2;Fgg;Fgb;Lat;Sh2b2
GO:0005543	phospholipid binding	16	228	0.515981	0.893639	306283;59267;302976;25728;365377;58949;24832;29692;81639;315298;116720;81820;288504;316521;117099;65178	Anxa8;Syt7;Noxo1;Apoe;Trim72;Ptafr;Thy1;Pla2g2a;Alox15;Racgap1;Pik3c2g;Doc2b;Snx8;Vil1;Bdh1;Snap91
GO:0097110	scaffold protein binding	3	39	0.517054	0.893639	301227;24392;301229	Trem2;Gja1;Trem1
GO:0005546	phosphatidylinositol-4,5-bisphosphate binding	3	39	0.517054	0.893639	81639;306283;316521	Alox15;Anxa8;Vil1
GO:0005096	GTPase activator activity	10	141	0.517314	0.893639	306279;361442;24832;288589;315298;54296;289076;192213;54289;310621	Arhgap22;Sipa1l2;Thy1;Rasa4;Racgap1;Rgs7;Rgs18;Rasgrf1;Rgs1;Iqgap3
GO:0035004	phosphatidylinositol 3-kinase activity	1	10	0.521165	0.893639	116720	Pik3c2g
GO:0019206	nucleoside kinase activity	1	10	0.521165	0.893639	24834	Tk1
GO:0016505	peptidase activator activity involved in apoptotic process	1	10	0.521165	0.893639	25425	Ctsh
GO:0008179	adenylate cyclase binding	1	10	0.521165	0.893639	50592	Gria1
GO:0015643	toxic substance binding	1	10	0.521165	0.893639	688090	RT1-Bb
GO:0008106	alcohol dehydrogenase (NADP+) activity	1	10	0.521165	0.893639	25375	Aldh3a1
GO:0031702	type 1 angiotensin receptor binding	1	10	0.521165	0.893639	50672	Ednrb
GO:0005545	1-phosphatidylinositol binding	1	10	0.521165	0.893639	65178	Snap91
GO:0005355	glucose transmembrane transporter activity	1	10	0.521165	0.893639	24778	Slc2a1
GO:0042923	neuropeptide binding	1	10	0.521165	0.893639	404640	Mrgprx2
GO:0016500	protein-hormone receptor activity	1	10	0.521165	0.893639	83567	Mchr1
GO:0031624	ubiquitin conjugating enzyme binding	1	10	0.521165	0.893639	171099	Rasd2
GO:0033612	receptor serine/threonine kinase binding	1	10	0.521165	0.893639	29200	Inhba
GO:0015295	solute:proton symporter activity	1	10	0.521165	0.893639	24778	Slc2a1
GO:0051787	misfolded protein binding	1	10	0.521165	0.893639	680945	Sdf2l1
GO:0048156	tau protein binding	1	10	0.521165	0.893639	25728	Apoe
GO:0000982	RNA polymerase II core promoter proximal region sequence-specific DNA binding transcription factor activity	13	186	0.52761	0.893639	296344;25154;366126;361514;79431;29452;24883;140586;117232;304815;311723;24890;81819	Mybl2;Pgr;Spi1;Meis3;Bhlhe40;Epas1;Wt1;Sox9;Barhl1;Elf3;Sox18;Esr1;Pax8
GO:0008514	organic anion transmembrane transporter activity	8	113	0.527799	0.893639	84012;50676;50719;83509;310392;25027;80900;24777	Slc1a6;Slc6a12;Slc7a5;Slc7a7;Slc7a11;Slc16a1;Slco1a5;Slc10a1
GO:0001191	RNA polymerase II transcription factor binding transcription factor activity involved in negative regulation of transcription	2	25	0.529248	0.893639	292301;79431	T;Bhlhe40
GO:0016887	ATPase activity	19	274	0.531029	0.893639	24212;361308;288026;360243;24891;171304;499870;29728;171529;29599;288079;24213;294286;293502;309523;170913;266714;685232;29639	Atp1a2;Kif20a;Atp13a4;Top2a;Abcb4;Kif11;Rad51;Mcm4;Kif2c;Atp2b3;Polq;Atp1a3;Kifc1;Kif22;Kif20b;Abcb1a;Myo7a;Atp6v1a;Fxyd2
GO:0019843	rRNA binding	3	40	0.533118	0.893639	100360781;25330;81772	LOC100360781;Lipe;Rps9
GO:0051117	ATPase binding	3	40	0.533118	0.893639	63848;680945;116831	Fxyd7;Sdf2l1;Fxyd3
GO:0019199	transmembrane receptor protein kinase activity	4	55	0.536301	0.893639	25589;89804;25054;29610	Kdr;Tek;Ntrk2;Tgfbr3
GO:0019212	phosphatase inhibitor activity	2	26	0.549107	0.893639	307472;259225	Sh3rf2;Ppp1r14b
GO:0030545	receptor regulator activity	2	26	0.549107	0.893639	498335;60582	Cxcl13;Il1rn
GO:0016620	oxidoreductase activity, acting on the aldehyde or oxo group of donors, NAD or NADP as acceptor	2	26	0.549107	0.893639	24383;25375	Gapdh;Aldh3a1
GO:0003705	RNA polymerase II distal enhancer sequence-specific DNA binding transcription factor activity	5	71	0.5511	0.893639	312897;292301;140586;79431;366126	Msc;T;Sox9;Bhlhe40;Spi1
GO:0019899	enzyme binding	83	1211	0.551645	0.893639	170568;25330;302976;291137;25154;680945;64515;63848;305827;364754;64041;308761;25203;114482;25316;155430;360243;25017;688090;24890;364018;310621;307472;361422;360161;170897;171304;81869;24533;680522;311406;315298;81651;301518;25553;502125;300027;113901;360847;170496;171099;24451;498840;360034;25060;50592;311167;361308;500987;191573;24832;311546;116510;117029;66015;25308;24778;81511;24599;360621;1…	Dmbt1;Lipe;Noxo1;Gmnn;Pgr;Sdf2l1;Cdc20;Fxyd7;Wdhd1;Fzd8;Birc5;Prc1;Ccnb1;Nek2;Ms4a2;Hey2;Top2a;Myo5a;RT1-Bb;Esr1;Ncf2;Iqgap3;Sh3rf2;Cotl1;Nek6;Sphk1;Kif11;Gstm7;Ldha;Hist1h1b;Dusp2;Racgap1;Cspg4;Prkag3;Slc6a4;Hist1h2ah;Gpihbp1;Chia;Ube2t;Lcn2;Rasd2;Hmox1;Tmem173;Myrip;Hk3;Gria1;Smtnl1;Kif20a;H2afx;Grin3a;Thy1;Tpx2;Timp1;Ccr5;Adamts4;Cstb;Slc2a1;Lat;Nos2;Cdc6;Ccna2;LOC100911545;Plk1;Cit;Rasgrf1;Pp…
GO:0042301	phosphate ion binding	1	11	0.552172	0.893639	680308	Mthfd2
GO:0005086	ARF guanyl-nucleotide exchange factor activity	1	11	0.552172	0.893639	500906	Cyth4
GO:0030228	lipoprotein particle receptor activity	1	11	0.552172	0.893639	499264	Apobr
GO:0030553	cGMP binding	1	11	0.552172	0.893639	81743	Pde2a
GO:0017017	MAP kinase tyrosine/serine/threonine phosphatase activity	1	11	0.552172	0.893639	311406	Dusp2
GO:0036002	pre-mRNA binding	1	11	0.552172	0.893639	140586	Sox9
GO:0004033	aldo-keto reductase (NADP) activity	1	11	0.552172	0.893639	25375	Aldh3a1
GO:0034236	protein kinase A catalytic subunit binding	1	11	0.552172	0.893639	140586	Sox9
GO:0015116	sulfate transmembrane transporter activity	1	11	0.552172	0.893639	29440	Slc26a4
GO:0031748	D1 dopamine receptor binding	1	11	0.552172	0.893639	24213	Atp1a3
GO:0050431	transforming growth factor beta binding	1	11	0.552172	0.893639	29610	Tgfbr3
GO:0004550	nucleoside diphosphate kinase activity	1	11	0.552172	0.893639	191575	Nme1
GO:0048185	activin binding	1	11	0.552172	0.893639	29610	Tgfbr3
GO:0016812	hydrolase activity, acting on carbon-nitrogen (but not peptide) bonds, in cyclic amides	1	11	0.552172	0.893639	25415	Crmp1
GO:0030898	actin-dependent ATPase activity	1	11	0.552172	0.893639	266714	Myo7a
GO:0005159	insulin-like growth factor receptor binding	1	11	0.552172	0.893639	24482	Igf1
GO:0044390	small protein conjugating enzyme binding	1	11	0.552172	0.893639	171099	Rasd2
GO:0000987	core promoter proximal region sequence-specific DNA binding	11	160	0.553066	0.893639	296344;366126;25154;311723;316129;304815;292301;81819;24890;24571;58940	Mybl2;Spi1;Pgr;Sox18;Uhrf1;Elf3;T;Pax8;Esr1;Muc1;H2afz
GO:0016462	pyrophosphatase activity	36	528	0.559801	0.893639	500377;29599;24212;24213;29213;170913;316077;25017;24891;293502;171304;291885;246118;29728;288079;29639;365901;365042;171529;360243;361308;100909441;685232;192249;89788;25686;300218;307351;294286;291081;288026;309523;266714;64626;499870;54410	Tuba8;Atp2b3;Atp1a2;Atp1a3;Tubb4a;Abcb1a;Entpd3;Myo5a;Abcb4;Kif22;Kif11;Mcm5;Tubb3;Mcm4;Polq;Fxyd2;Gnat2;Rab32;Kif2c;Top2a;Kif20a;LOC100909441;Atp6v1a;Ehd3;Gna15;Gnai1;Tuba1c;Tubb6;Kifc1;Tubb2b;Atp13a4;Kif20b;Myo7a;Rem2;Rad51;Enpp3
GO:0019900	kinase binding	30	441	0.563791	0.893639	25330;192213;24832;25316;113901;308761;25203;360243;360161;191575;171304;24533;315298;140586;301518;24778;24599;498840;50592;311406;311546;117029;114494;361308;81511;25515;360621;25083;685692;81651	Lipe;Rasgrf1;Thy1;Ms4a2;Chia;Prc1;Ccnb1;Top2a;Nek6;Nme1;Kif11;Ldha;Racgap1;Sox9;Prkag3;Slc2a1;Nos2;Tmem173;Gria1;Dusp2;Tpx2;Ccr5;Ccna2;Kif20a;Lat;Plk1;Cdc6;Adra2a;Gcsam;Cspg4
GO:0042623	ATPase activity, coupled	13	191	0.564165	0.893639	24212;288026;360243;24891;499870;29728;29599;288079;24213;170913;266714;685232;29639	Atp1a2;Atp13a4;Top2a;Abcb4;Rad51;Mcm4;Atp2b3;Polq;Atp1a3;Abcb1a;Myo7a;Atp6v1a;Fxyd2
GO:0008378	galactosyltransferase activity	2	27	0.568369	0.893639	316583;290638	B3gnt7;B3gnt3
GO:0008066	glutamate receptor activity	2	27	0.568369	0.893639	191573;50592	Grin3a;Gria1
GO:0048487	beta-tubulin binding	2	27	0.568369	0.893639	315298;24392	Racgap1;Gja1
GO:0016818	hydrolase activity, acting on acid anhydrides, in phosphorus-containing anhydrides	36	530	0.568483	0.893639	500377;29599;24212;24213;29213;170913;316077;25017;24891;293502;171304;291885;246118;29728;288079;29639;365901;365042;171529;360243;361308;100909441;685232;192249;89788;25686;300218;307351;294286;291081;288026;309523;266714;64626;499870;54410	Tuba8;Atp2b3;Atp1a2;Atp1a3;Tubb4a;Abcb1a;Entpd3;Myo5a;Abcb4;Kif22;Kif11;Mcm5;Tubb3;Mcm4;Polq;Fxyd2;Gnat2;Rab32;Kif2c;Top2a;Kif20a;LOC100909441;Atp6v1a;Ehd3;Gna15;Gnai1;Tuba1c;Tubb6;Kifc1;Tubb2b;Atp13a4;Kif20b;Myo7a;Rem2;Rad51;Enpp3
GO:0042826	histone deacetylase binding	4	58	0.576035	0.893639	680522;360243;291137;155430	Hist1h1b;Top2a;Gmnn;Hey2
GO:0001159	core promoter proximal region DNA binding	11	163	0.57655	0.893639	296344;366126;25154;311723;316129;304815;292301;81819;24890;24571;58940	Mybl2;Spi1;Pgr;Sox18;Uhrf1;Elf3;T;Pax8;Esr1;Muc1;H2afz
GO:0004714	transmembrane receptor protein tyrosine kinase activity	3	43	0.579421	0.893639	25589;89804;25054	Kdr;Tek;Ntrk2
GO:0015271	outward rectifier potassium channel activity	1	12	0.58117	0.893639	170899	Kcnk2
GO:0005337	nucleoside transmembrane transporter activity	1	12	0.58117	0.893639	63997	Slc29a1
GO:0070742	C2H2 zinc finger domain binding	1	12	0.58117	0.893639	24883	Wt1
GO:0005536	glucose binding	1	12	0.58117	0.893639	25059	Hk2
GO:0003995	acyl-CoA dehydrogenase activity	1	12	0.58117	0.893639	296138	Acoxl
GO:0034483	heparan sulfate sulfotransferase activity	1	12	0.58117	0.893639	302489	Hs6st2
GO:0004955	prostaglandin receptor activity	1	12	0.58117	0.893639	79242	Hpgd
GO:0004697	protein kinase C activity	1	12	0.58117	0.893639	25542	Ccl3
GO:0036041	long-chain fatty acid binding	1	12	0.58117	0.893639	316521	Vil1
GO:0031701	angiotensin receptor binding	1	12	0.58117	0.893639	50672	Ednrb
GO:0004983	neuropeptide Y receptor activity	1	12	0.58117	0.893639	246075	Prlhr
GO:0033549	MAP kinase phosphatase activity	1	12	0.58117	0.893639	311406	Dusp2
GO:0005024	transforming growth factor beta-activated receptor activity	1	12	0.58117	0.893639	29610	Tgfbr3
GO:0005416	cation:amino acid symporter activity	1	12	0.58117	0.893639	50676	Slc6a12
GO:0004675	transmembrane receptor protein serine/threonine kinase activity	1	12	0.58117	0.893639	29610	Tgfbr3
GO:0004143	diacylglycerol kinase activity	1	12	0.58117	0.893639	170897	Sphk1
GO:0001784	phosphotyrosine binding	1	12	0.58117	0.893639	292699	Cblc
GO:0031996	thioesterase binding	1	12	0.58117	0.893639	25083	Adra2a
GO:0017110	nucleoside-diphosphatase activity	1	12	0.58117	0.893639	316077	Entpd3
GO:0015149	hexose transmembrane transporter activity	1	12	0.58117	0.893639	24778	Slc2a1
GO:0070403	NAD+ binding	1	12	0.58117	0.893639	79242	Hpgd
GO:0016307	phosphatidylinositol phosphate kinase activity	1	12	0.58117	0.893639	116720	Pik3c2g
GO:0005547	phosphatidylinositol-3,4,5-trisphosphate binding	2	28	0.587027	0.899134	306283;315298	Anxa8;Racgap1
GO:0016877	ligase activity, forming carbon-sulfur bonds	2	28	0.587027	0.899134	311569;113976	Acss2;Acsl4
GO:0005253	anion channel activity	4	59	0.588841	0.899134	29695;314847;81658;406864	Gabrr2;Best3;Gabrp;Clic1
GO:0051213	dioxygenase activity	4	59	0.588841	0.899134	81639;296621;287424;81718	Alox15;Phyhd1;Aloxe3;Cdo1
GO:0060090	binding, bridging	5	75	0.597251	0.905718	290361;24367;24366;81511;114203	Dok2;Fgg;Fgb;Lat;Sh2b2
GO:0001085	RNA polymerase II transcription factor binding	5	75	0.597251	0.905718	155430;292301;79431;366126;114090	Hey2;T;Bhlhe40;Spi1;Egr2
GO:0000149	SNARE binding	4	60	0.601417	0.905718	59267;25017;81820;25553	Syt7;Myo5a;Doc2b;Slc6a4
GO:0019205	nucleobase-containing compound kinase activity	2	29	0.605078	0.905718	24834;191575	Tk1;Nme1
GO:0070330	aromatase activity	2	29	0.605078	0.905718	24299;266684	Cyp2a3;Cyp2d1
GO:0008509	anion transmembrane transporter activity	13	197	0.606511	0.905718	84012;50676;50719;406864;314847;29695;80900;29440;83509;25027;81658;310392;24777	Slc1a6;Slc6a12;Slc7a5;Clic1;Best3;Gabrr2;Slco1a5;Slc26a4;Slc7a7;Slc16a1;Gabrp;Slc7a11;Slc10a1
GO:0043539	protein serine/threonine kinase activator activity	1	13	0.608291	0.905718	24482	Igf1
GO:0052742	phosphatidylinositol kinase activity	1	13	0.608291	0.905718	116720	Pik3c2g
GO:0004659	prenyltransferase activity	1	13	0.608291	0.905718	83791	Fdps
GO:0004954	prostanoid receptor activity	1	13	0.608291	0.905718	79242	Hpgd
GO:0050750	low-density lipoprotein particle receptor binding	1	13	0.608291	0.905718	25728	Apoe
GO:0008353	RNA polymerase II carboxy-terminal domain kinase activity	1	13	0.608291	0.905718	54237	Cdk1
GO:0046961	proton-transporting ATPase activity, rotational mechanism	1	13	0.608291	0.905718	685232	Atp6v1a
GO:1901338	catecholamine binding	1	13	0.608291	0.905718	25083	Adra2a
GO:0003707	steroid hormone receptor activity	3	45	0.608626	0.905718	24890;25154;299210	Esr1;Pgr;Esrrb
GO:0009055	electron carrier activity	4	61	0.613757	0.911808	54349;79129;100363502;66021	Aox1;Cyba;LOC100363502;Cybb
GO:0000978	RNA polymerase II core promoter proximal region sequence-specific DNA binding	10	153	0.615421	0.912736	296344;366126;25154;311723;304815;292301;81819;24890;24571;58940	Mybl2;Spi1;Pgr;Sox18;Elf3;T;Pax8;Esr1;Muc1;H2afz
GO:0019901	protein kinase binding	26	393	0.617073	0.913257	25330;192213;24832;25316;308761;25203;50592;360161;191575;171304;315298;140586;301518;24599;498840;360243;311406;311546;117029;114494;361308;81511;25515;25083;685692;81651	Lipe;Rasgrf1;Thy1;Ms4a2;Prc1;Ccnb1;Gria1;Nek6;Nme1;Kif11;Racgap1;Sox9;Prkag3;Nos2;Tmem173;Top2a;Dusp2;Tpx2;Ccr5;Ccna2;Kif20a;Lat;Plk1;Adra2a;Gcsam;Cspg4
GO:0046875	ephrin receptor binding	2	30	0.622523	0.913257	306636;25054	Efnb2;Ntrk2
GO:0005231	excitatory extracellular ligand-gated ion channel activity	3	46	0.622709	0.913257	191573;25753;50592	Grin3a;Chrng;Gria1
GO:0030594	neurotransmitter receptor activity	4	62	0.625856	0.913257	29235;24807;25033;246075	Galr3;Tacr1;Sstr1;Prlhr
GO:0004889	acetylcholine-activated cation-selective channel activity	1	14	0.633656	0.913257	25753	Chrng
GO:0015145	monosaccharide transmembrane transporter activity	1	14	0.633656	0.913257	24778	Slc2a1
GO:0000175	3'-5'-exoribonuclease activity	1	14	0.633656	0.913257	310395	Ccr4
GO:0004629	phospholipase C activity	1	14	0.633656	0.913257	29290	Adora1
GO:0015645	fatty acid ligase activity	1	14	0.633656	0.913257	113976	Acsl4
GO:0003951	NAD+ kinase activity	1	14	0.633656	0.913257	170897	Sphk1
GO:0016896	exoribonuclease activity, producing 5'-phosphomonoesters	1	14	0.633656	0.913257	310395	Ccr4
GO:0016594	glycine binding	1	14	0.633656	0.913257	191573	Grin3a
GO:0008320	protein transmembrane transporter activity	1	14	0.633656	0.913257	300027	Gpihbp1
GO:0016408	C-acyltransferase activity	1	14	0.633656	0.913257	308100	Acat2
GO:0030170	pyridoxal phosphate binding	3	47	0.636441	0.913257	690745;24962;286896	Marc1;Cth;Sgpl1
GO:0000977	RNA polymerase II regulatory region sequence-specific DNA binding	16	247	0.637473	0.913257	296344;25334;366126;299210;25154;687536;191575;312897;314818;81819;304815;292301;311723;24890;24571;58940	Mybl2;Bhlha15;Spi1;Esrrb;Pgr;Foxf1;Nme1;Msc;E2f7;Pax8;Elf3;T;Sox18;Esr1;Muc1;H2afz
GO:0005504	fatty acid binding	2	31	0.639365	0.913257	316521;140868	Vil1;Fabp5
GO:0051721	protein phosphatase 2A binding	2	31	0.639365	0.913257	191573;170897	Grin3a;Sphk1
GO:0005109	frizzled binding	2	31	0.639365	0.913257	282836;498997	Cthrc1;Rspo3
GO:0004725	protein tyrosine phosphatase activity	5	79	0.640606	0.913257	116680;246781;64576;289993;311406	Ptpru;Ptpn7;Ptprv;Cdkn3;Dusp2
GO:0032561	guanyl ribonucleotide binding	22	338	0.640979	0.913257	500377;29213;171099;25686;353250;246118;307415;81743;365901;498840;365042;501854;191575;100909441;192249;89788;364396;300218;307351;29244;291081;64626	Tuba8;Tubb4a;Rasd2;Gnai1;Niacr1;Tubb3;RGD1309362;Pde2a;Gnat2;Tmem173;Rab32;Rab7b;Nme1;LOC100909441;Ehd3;Gna15;Arl11;Tuba1c;Tubb6;Gch1;Tubb2b;Rem2
GO:0019001	guanyl nucleotide binding	22	338	0.640979	0.913257	500377;29213;171099;25686;353250;246118;307415;81743;365901;498840;365042;501854;191575;100909441;192249;89788;364396;300218;307351;29244;291081;64626	Tuba8;Tubb4a;Rasd2;Gnai1;Niacr1;Tubb3;RGD1309362;Pde2a;Gnat2;Tmem173;Rab32;Rab7b;Nme1;LOC100909441;Ehd3;Gna15;Arl11;Tuba1c;Tubb6;Gch1;Tubb2b;Rem2
GO:0060589	nucleoside-triphosphatase regulator activity	12	187	0.641732	0.913257	83620;293693;306279;361442;288589;24832;315298;54296;289076;192213;54289;310621	Cit;Cdc42bpg;Arhgap22;Sipa1l2;Rasa4;Thy1;Racgap1;Rgs7;Rgs18;Rasgrf1;Rgs1;Iqgap3
GO:0048029	monosaccharide binding	4	64	0.649318	0.913257	24375;25350;25651;25059	Fuca1;Sftpd;Selp;Hk2
GO:0008565	protein transporter activity	4	64	0.649318	0.913257	315215;65046;300027;58966	Mlc1;Ap2s1;Gpihbp1;Ramp2
GO:0005507	copper ion binding	3	48	0.649819	0.913257	117038;24493;113910	Mt3;Il1a;Prnd
GO:0016874	ligase activity	16	250	0.655237	0.913257	307472;64557;316395;303596;311569;140939;362415;296368;298692;497672;292699;316129;114090;360847;316326;113976	Sh3rf2;Bard1;Hecw2;March10;Acss2;Trim63;Ttll3;Ube2c;Ttll10;Brca1;Cblc;Uhrf1;Egr2;Ube2t;Neurl3;Acsl4
GO:0016229	steroid dehydrogenase activity	2	32	0.655609	0.913257	170635;24950	Dhrs9;Srd5a1
GO:0030551	cyclic nucleotide binding	2	32	0.655609	0.913257	81743;498840	Pde2a;Tmem173
GO:0004602	glutathione peroxidase activity	1	15	0.657378	0.913257	114097	Ltc4s
GO:0017091	AU-rich element binding	1	15	0.657378	0.913257	25383	Apobec1
GO:0016538	cyclin-dependent protein serine/threonine kinase regulator activity	1	15	0.657378	0.913257	498709	Cks2
GO:0043325	phosphatidylinositol-3,4-bisphosphate binding	1	15	0.657378	0.913257	306283	Anxa8
GO:0004532	exoribonuclease activity	1	15	0.657378	0.913257	310395	Ccr4
GO:0005385	zinc ion transmembrane transporter activity	1	15	0.657378	0.913257	306009	Slc39a14
GO:0005160	transforming growth factor beta receptor binding	1	15	0.657378	0.913257	29610	Tgfbr3
GO:0003785	actin monomer binding	1	15	0.657378	0.913257	50665	Tmsb10
GO:0031489	myosin V binding	1	15	0.657378	0.913257	50592	Gria1
GO:0015269	calcium-activated potassium channel activity	1	15	0.657378	0.913257	83731	Kcnma1
GO:0005310	dicarboxylic acid transmembrane transporter activity	1	15	0.657378	0.913257	84012	Slc1a6
GO:0016881	acid-amino acid ligase activity	4	65	0.660674	0.916385	298692;360847;296368;362415	Ttll10;Ube2t;Ube2c;Ttll3
GO:1902936	phosphatidylinositol bisphosphate binding	3	49	0.662841	0.917941	81639;306283;316521	Alox15;Anxa8;Vil1
GO:0001012	RNA polymerase II regulatory region DNA binding	16	252	0.66682	0.921145	296344;25334;366126;299210;25154;687536;191575;312897;314818;81819;304815;292301;311723;24890;24571;58940	Mybl2;Bhlha15;Spi1;Esrrb;Pgr;Foxf1;Nme1;Msc;E2f7;Pax8;Elf3;T;Sox18;Esr1;Muc1;H2afz
GO:0015179	L-amino acid transmembrane transporter activity	2	33	0.671261	0.921145	84012;50719	Slc1a6;Slc7a5
GO:0031490	chromatin DNA binding	4	66	0.671778	0.921145	680522;291145;83516;58940	Hist1h1b;Hist1h1a;Ppargc1a;H2afz
GO:0035091	phosphatidylinositol binding	9	146	0.678973	0.921145	306283;302976;315298;24832;81639;116720;288504;316521;65178	Anxa8;Noxo1;Racgap1;Thy1;Alox15;Pik3c2g;Snx8;Vil1;Snap91
GO:0043274	phospholipase binding	1	16	0.679565	0.921145	25544	Sele
GO:0070325	lipoprotein particle receptor binding	1	16	0.679565	0.921145	25728	Apoe
GO:0005247	voltage-gated chloride channel activity	1	16	0.679565	0.921145	406864	Clic1
GO:0004003	ATP-dependent DNA helicase activity	1	16	0.679565	0.921145	29728	Mcm4
GO:0032451	demethylase activity	1	16	0.679565	0.921145	25427	Cyp51
GO:0032794	GTPase activating protein binding	1	16	0.679565	0.921145	25686	Gnai1
GO:0044769	ATPase activity, coupled to transmembrane movement of ions, rotational mechanism	1	16	0.679565	0.921145	685232	Atp6v1a
GO:0008307	structural constituent of muscle	1	16	0.679565	0.921145	308709	Synm
GO:0017124	SH3 domain binding	5	83	0.68093	0.921145	309760;79129;24392;679837;292699	Mypn;Cyba;Gja1;Adam12;Cblc
GO:0015103	inorganic anion transmembrane transporter activity	5	83	0.68093	0.921145	29695;29440;81658;406864;314847	Gabrr2;Slc26a4;Gabrp;Clic1;Best3
GO:0004713	protein tyrosine kinase activity	6	99	0.681063	0.921145	89804;25054;60450;362510;25589;84492	Tek;Ntrk2;Matk;Melk;Kdr;Tec
GO:0098531	direct ligand regulated sequence-specific DNA binding transcription factor activity	2	34	0.68633	0.921145	24890;25154	Esr1;Pgr
GO:0003755	peptidyl-prolyl cis-trans isomerase activity	2	34	0.68633	0.921145	100360977;300211	LOC100360977;Fkbp11
GO:0004879	ligand-activated sequence-specific DNA binding RNA polymerase II transcription factor activity	2	34	0.68633	0.921145	24890;25154	Esr1;Pgr
GO:0004674	protein serine/threonine kinase activity	21	332	0.68665	0.921145	83620;24649;293693;171576;89813;296137;54237;290326;117558;315852;310344;301518;362510;25542;306811;365298;29610;114482;304334;360161;25515	Cit;Pim1;Cdc42bpg;Bub1b;Pdk4;Bub1;Cdk1;Pbk;Mylk2;Ttk;Plk4;Prkag3;Melk;Ccl3;Wnk2;Alpk3;Tgfbr3;Nek2;Fam20c;Nek6;Plk1
GO:0035035	histone acetyltransferase binding	1	17	0.700314	0.921145	29452	Epas1
GO:0030332	cyclin binding	1	17	0.700314	0.921145	54237	Cdk1
GO:0004953	icosanoid receptor activity	1	17	0.700314	0.921145	79242	Hpgd
GO:0023023	MHC protein complex binding	1	17	0.700314	0.921145	294269	RT1-Da
GO:0005528	FK506 binding	1	17	0.700314	0.921145	300211	Fkbp11
GO:0016922	ligand-dependent nuclear receptor binding	1	17	0.700314	0.921145	83516	Ppargc1a
GO:0001786	phosphatidylserine binding	1	17	0.700314	0.921145	365377	Trim72
GO:0008536	Ran GTPase binding	1	17	0.700314	0.921145	64041	Birc5
GO:0023026	MHC class II protein complex binding	1	17	0.700314	0.921145	294269	RT1-Da
GO:0005527	macrolide binding	1	17	0.700314	0.921145	300211	Fkbp11
GO:0022884	macromolecule transmembrane transporter activity	1	17	0.700314	0.921145	300027	Gpihbp1
GO:0005184	neuropeptide hormone activity	1	17	0.700314	0.921145	25569	Trh
GO:0015101	organic cation transmembrane transporter activity	1	17	0.700314	0.921145	24904	Slc22a1
GO:0051019	mitogen-activated protein kinase binding	1	17	0.700314	0.921145	311406	Dusp2
GO:0050840	extracellular matrix binding	2	35	0.700826	0.921145	83781;50654	Lgals3;Ctss
GO:0017137	Rab GTPase binding	4	69	0.703561	0.922503	360034;25017;302538;25553	Myrip;Myo5a;Sytl5;Slc6a4
GO:0001067	regulatory region nucleic acid binding	27	428	0.707262	0.922503	85497;81819;292060;25334;299210;79431;312897;497672;316129;24890;24571;296344;25154;113898;291100;58940;687536;191575;24883;314818;311723;304815;366126;140586;114090;64160;292301	Klf15;Pax8;Irf8;Bhlha15;Esrrb;Bhlhe40;Msc;Brca1;Uhrf1;Esr1;Muc1;Mybl2;Pgr;Prdx5;Irf4;H2afz;Foxf1;Nme1;Wt1;E2f7;Sox18;Elf3;Spi1;Sox9;Egr2;Basp1;T
GO:0000975	regulatory region DNA binding	27	428	0.707262	0.922503	85497;81819;292060;25334;299210;79431;312897;497672;316129;24890;24571;296344;25154;113898;291100;58940;687536;191575;24883;314818;311723;304815;366126;140586;114090;64160;292301	Klf15;Pax8;Irf8;Bhlha15;Esrrb;Bhlhe40;Msc;Brca1;Uhrf1;Esr1;Muc1;Mybl2;Pgr;Prdx5;Irf4;H2afz;Foxf1;Nme1;Wt1;E2f7;Sox18;Elf3;Spi1;Sox9;Egr2;Basp1;T
GO:0005525	GTP binding	20	321	0.70746	0.922503	365042;501854;25686;364396;353250;300218;307351;246118;89788;29244;291081;191575;307415;29213;100909441;64626;171099;500377;192249;365901	Rab32;Rab7b;Gnai1;Arl11;Niacr1;Tuba1c;Tubb6;Tubb3;Gna15;Gch1;Tubb2b;Nme1;RGD1309362;Tubb4a;LOC100909441;Rem2;Rasd2;Tuba8;Ehd3;Gnat2
GO:0000976	transcription regulatory region sequence-specific DNA binding	18	291	0.711346	0.922503	296344;25334;366126;299210;25154;687536;191575;312897;314818;140586;81819;316129;304815;292301;311723;24890;24571;58940	Mybl2;Bhlha15;Spi1;Esrrb;Pgr;Foxf1;Nme1;Msc;E2f7;Sox9;Pax8;Uhrf1;Elf3;T;Sox18;Esr1;Muc1;H2afz
GO:0017048	Rho GTPase binding	3	53	0.711378	0.922503	83620;364018;310621	Cit;Ncf2;Iqgap3
GO:0043566	structure-specific DNA binding	12	198	0.712629	0.922503	291145;83516;58940;29728;191575;363227;24883;304988;316129;680522;360243;499870	Hist1h1a;Ppargc1a;H2afz;Mcm4;Nme1;Nabp1;Wt1;Mnda;Uhrf1;Hist1h1b;Top2a;Rad51
GO:0016859	cis-trans isomerase activity	2	36	0.714759	0.922503	100360977;300211	LOC100360977;Fkbp11
GO:0001205	RNA polymerase II distal enhancer sequence-specific DNA binding transcription factor activity involved in positive regulation of transcription	1	18	0.71972	0.922503	366126	Spi1
GO:0043014	alpha-tubulin binding	1	18	0.71972	0.922503	315298	Racgap1
GO:0005212	structural constituent of eye lens	1	18	0.71972	0.922503	64348	Cryba4
GO:0051879	Hsp90 protein binding	1	18	0.71972	0.922503	24599	Nos2
GO:0051537	2 iron, 2 sulfur cluster binding	1	18	0.71972	0.922503	54349	Aox1
GO:0016849	phosphorus-oxygen lyase activity	1	18	0.71972	0.922503	305509	Adcy1
GO:0009975	cyclase activity	1	18	0.71972	0.922503	305509	Adcy1
GO:0030546	receptor activator activity	1	18	0.71972	0.922503	498335	Cxcl13
GO:0017112	Rab guanyl-nucleotide exchange factor activity	1	18	0.71972	0.922503	310772	Dennd2d
GO:0001227	RNA polymerase II transcription regulatory region sequence-specific DNA binding transcription factor activity involved in negative regulation of transcription	4	71	0.723476	0.925965	312897;314818;79431;366126	Msc;E2f7;Bhlhe40;Spi1
GO:0016773	phosphotransferase activity, alcohol group as acceptor	35	555	0.72734	0.928151	171576;170897;290326;25054;315852;89804;114482;25203;25542;365298;360161;25059;310344;301518;306811;29610;304334;84492;25060;116720;54237;89813;117558;362510;367146;25515;83620;293693;287562;296137;60450;24649;140586;79223;25589	Bub1b;Sphk1;Pbk;Ntrk2;Ttk;Tek;Nek2;Ccnb1;Ccl3;Alpk3;Nek6;Hk2;Plk4;Prkag3;Wnk2;Tgfbr3;Fam20c;Tec;Hk3;Pik3c2g;Cdk1;Pdk4;Mylk2;Melk;Gk5;Plk1;Cit;Cdc42bpg;Ccl12;Bub1;Matk;Pim1;Sox9;Gk;Kdr
GO:0030971	receptor tyrosine kinase binding	2	37	0.728143	0.928151	114203;290361	Sh2b2;Dok2
GO:0004672	protein kinase activity	29	465	0.733016	0.928151	171576;89813;290326;25054;54237;114482;25203;25542;365298;360161;310344;301518;306811;29610;304334;84492;89804;315852;117558;362510;25515;83620;293693;287562;296137;60450;24649;140586;25589	Bub1b;Pdk4;Pbk;Ntrk2;Cdk1;Nek2;Ccnb1;Ccl3;Alpk3;Nek6;Plk4;Prkag3;Wnk2;Tgfbr3;Fam20c;Tec;Tek;Ttk;Mylk2;Melk;Plk1;Cit;Cdc42bpg;Ccl12;Bub1;Matk;Pim1;Sox9;Kdr
GO:0051119	sugar transmembrane transporter activity	1	19	0.737869	0.928151	24778	Slc2a1
GO:0070063	RNA polymerase binding	1	19	0.737869	0.928151	305827	Wdhd1
GO:0045309	protein phosphorylated amino acid binding	1	19	0.737869	0.928151	292699	Cblc
GO:0036442	hydrogen-exporting ATPase activity	1	19	0.737869	0.928151	685232	Atp6v1a
GO:0004114	3',5'-cyclic-nucleotide phosphodiesterase activity	1	19	0.737869	0.928151	81743	Pde2a
GO:0097472	cyclin-dependent protein kinase activity	1	19	0.737869	0.928151	54237	Cdk1
GO:0051861	glycolipid binding	1	19	0.737869	0.928151	24832	Thy1
GO:1901682	sulfur compound transmembrane transporter activity	1	19	0.737869	0.928151	29440	Slc26a4
GO:0004693	cyclin-dependent protein serine/threonine kinase activity	1	19	0.737869	0.928151	54237	Cdk1
GO:0052689	carboxylic ester hydrolase activity	5	90	0.743871	0.930832	291437;25330;50559;690625;29692	Lipg;Lipe;Acot1;Oc90;Pla2g2a
GO:0016790	thiolester hydrolase activity	3	56	0.744107	0.930832	50559;50671;361993	Acot1;Fasn;Them5
GO:0003824	catalytic activity	285	4280	0.746604	0.930832	288617;29592;64576;89813;298282;29599;113901;29213;84387;316077;25375;24310;81726;286896;246118;293504;25335;304860;296368;29692;54269;295934;289185;305253;29610;24962;497009;85266;29290;84492;84493;63865;365042;58962;89804;294257;360243;311406;291100;362510;191575;66015;312705;24787;54282;24299;362619;25694;266684;25515;83620;89788;24383;300218;50671;83627;83783;294286;297814;259235;89784;290757…	Tpst1;Bcat1;Ptprv;Pdk4;Oma1;Atp2b3;Chia;Tubb4a;Pglyrp1;Entpd3;Aldh3a1;Ace;Mvd;Sgpl1;Tubb3;Qprt;Mmp7;Npl;Ube2c;Pla2g2a;Mcpt10;Chst1;Creg1;Adamts3;Tgfbr3;Cth;Naaa;Prss12;Adora1;Tec;Fmo3;Lgmn;Rab32;Hpgds;Tek;Cfb;Top2a;Dusp2;Irf4;Melk;Nme1;Adamts4;C1r;Sod2;Padi1;Cyp2a3;Smpdl3b;Has2;Cyp2d1;Plk1;Cit;Gna15;Gapdh;Tuba1c;Fasn;Galnt5;Sult1a1;Kifc1;Car8;Sdr9c7;Idi1;F11;Ctsz;Alox15;Hp;Gm2a;Gusb;Kdr;Atp13a4;R…
GO:0005099	Ras GTPase activator activity	4	74	0.751451	0.930832	288589;24832;192213;310621	Rasa4;Thy1;Rasgrf1;Iqgap3
GO:0016667	oxidoreductase activity, acting on a sulfur group of donors	2	39	0.753313	0.930832	290644;84491	Ifi30;Qsox1
GO:0031491	nucleosome binding	2	39	0.753313	0.930832	58940;316129	H2afz;Uhrf1
GO:0004536	deoxyribonuclease activity	2	39	0.753313	0.930832	298884;191575	Gen1;Nme1
GO:0016301	kinase activity	39	624	0.754217	0.930832	171576;25059;24834;25054;315852;89804;114482;25203;25542;360161;81726;365298;170897;310344;301518;306811;29610;304334;84492;290326;25060;116720;54237;89813;117558;362510;191575;498709;367146;25515;83620;293693;287562;296137;60450;24649;140586;79223;25589	Bub1b;Hk2;Tk1;Ntrk2;Ttk;Tek;Nek2;Ccnb1;Ccl3;Nek6;Mvd;Alpk3;Sphk1;Plk4;Prkag3;Wnk2;Tgfbr3;Fam20c;Tec;Pbk;Hk3;Pik3c2g;Cdk1;Pdk4;Mylk2;Melk;Nme1;Cks2;Gk5;Plk1;Cit;Cdc42bpg;Ccl12;Bub1;Matk;Pim1;Sox9;Gk;Kdr
GO:0043178	alcohol binding	3	57	0.754336	0.930832	25557;192211;679975	Star;Prom2;Gpr183
GO:0003682	chromatin binding	21	347	0.75484	0.930832	300795;684762;360243;58940;114090;361623;360621;361514;291145;83516;305827;140586;684841;316129;680522;296344;308768;24890;360847;310678;294071	Ns5atp9;LOC684762;Top2a;H2afz;Egr2;Trim66;Cdc6;Meis3;Hist1h1a;Ppargc1a;Wdhd1;Sox9;LOC684841;Uhrf1;Hist1h1b;Mybl2;Ticrr;Esr1;Ube2t;Hist2h3c2;Hells
GO:0004112	cyclic-nucleotide phosphodiesterase activity	1	20	0.754844	0.930832	81743	Pde2a
GO:0050780	dopamine receptor binding	1	20	0.754844	0.930832	24213	Atp1a3
GO:0051393	alpha-actinin binding	1	20	0.754844	0.930832	309760	Mypn
GO:0016776	phosphotransferase activity, phosphate group as acceptor	1	20	0.754844	0.930832	191575	Nme1
GO:0042578	phosphoric ester hydrolase activity	16	269	0.756132	0.931114	361527;64576;311406;116680;363781;309014;25732;362619;246781;81743;294422;29290;289997;24451;289993;54410	Pld3;Ptprv;Dusp2;Ptpru;Plcxd2;Ppapdc1a;Acp5;Smpdl3b;Ptpn7;Pde2a;Smpdl3a;Adora1;Dlgap5;Hmox1;Cdkn3;Enpp3
GO:0015078	hydrogen ion transmembrane transporter activity	5	92	0.760063	0.934643	360539;685232;293650;297932;317170	Slc47a1;Atp6v1a;Tcirg1;Atp6v0d2;Slc9a7
GO:0043621	protein self-association	2	40	0.765125	0.939553	24778;25425	Slc2a1;Ctsh
GO:0005100	Rho GTPase activator activity	1	21	0.770719	0.942466	24832	Thy1
GO:0008483	transaminase activity	1	21	0.770719	0.942466	29592	Bcat1
GO:0008308	voltage-gated anion channel activity	1	21	0.770719	0.942466	406864	Clic1
GO:0031267	small GTPase binding	9	160	0.771836	0.94252	83620;360034;50592;25553;64041;302538;25017;364018;310621	Cit;Myrip;Gria1;Slc6a4;Birc5;Sytl5;Myo5a;Ncf2;Iqgap3
GO:0051219	phosphoprotein binding	3	59	0.773802	0.943609	25415;25316;292699	Crmp1;Ms4a2;Cblc
GO:0008234	cysteine-type peptidase activity	7	128	0.777751	0.947108	252929;293676;63865;29175;315330;50654;25425	Ctsz;Ctsw;Lgmn;Ctsk;Espl1;Ctss;Ctsh
GO:0000981	sequence-specific DNA binding RNA polymerase II transcription factor activity	19	322	0.781187	0.949975	24883;687536;296344;25334;366126;25154;117232;361514;79431;29452;312897;314818;140586;304815;155430;292301;311723;24890;81819	Wt1;Foxf1;Mybl2;Bhlha15;Spi1;Pgr;Barhl1;Meis3;Bhlhe40;Epas1;Msc;E2f7;Sox9;Elf3;Hey2;T;Sox18;Esr1;Pax8
GO:0008376	acetylgalactosaminyltransferase activity	1	22	0.785566	0.950037	83627	Galnt5
GO:0005104	fibroblast growth factor receptor binding	1	22	0.785566	0.950037	83504	Kl
GO:0016796	exonuclease activity, active with either ribo- or deoxyribonucleic acids and producing 5'-phosphomonoesters	1	22	0.785566	0.950037	310395	Ccr4
GO:0042165	neurotransmitter binding	1	22	0.785566	0.950037	191573	Grin3a
GO:0030295	protein kinase activator activity	2	42	0.78728	0.9508	117038;24482	Mt3;Igf1
GO:0005057	receptor signaling protein activity	4	79	0.793152	0.952399	361537;89804;365183;290361	Tyrobp;Tek;Fcar;Dok2
GO:0005083	small GTPase regulator activity	6	114	0.796026	0.952399	83620;293693;24832;288589;192213;310621	Cit;Cdc42bpg;Thy1;Rasa4;Rasgrf1;Iqgap3
GO:0004540	ribonuclease activity	2	43	0.79765	0.952399	310395;292306	Ccr4;Rnaset2
GO:0044212	transcription regulatory region DNA binding	25	421	0.798203	0.952399	85497;81819;25334;299210;79431;312897;497672;316129;24890;24571;296344;25154;113898;58940;687536;191575;24883;314818;311723;304815;366126;140586;114090;64160;292301	Klf15;Pax8;Bhlha15;Esrrb;Bhlhe40;Msc;Brca1;Uhrf1;Esr1;Muc1;Mybl2;Pgr;Prdx5;H2afz;Foxf1;Nme1;Wt1;E2f7;Sox18;Elf3;Spi1;Sox9;Egr2;Basp1;T
GO:0015932	nucleobase-containing compound transmembrane transporter activity	1	23	0.799451	0.952399	63997	Slc29a1
GO:0003887	DNA-directed DNA polymerase activity	1	23	0.799451	0.952399	288079	Polq
GO:0001965	G-protein alpha-subunit binding	1	23	0.799451	0.952399	50592	Gria1
GO:0019894	kinesin binding	1	23	0.799451	0.952399	360161	Nek6
GO:0030552	cAMP binding	1	23	0.799451	0.952399	81743	Pde2a
GO:0005548	phospholipid transporter activity	1	23	0.799451	0.952399	298504	Mfsd2a
GO:0043021	ribonucleoprotein complex binding	3	62	0.800607	0.952484	24649;191575;298068	Pim1;Nme1;Sec61b
GO:0015297	antiporter activity	2	44	0.80757	0.958585	360539;317170	Slc47a1;Slc9a7
GO:0004521	endoribonuclease activity	1	24	0.812438	0.958585	292306	Rnaset2
GO:0016417	S-acyltransferase activity	1	24	0.812438	0.958585	50671	Fasn
GO:0005251	delayed rectifier potassium channel activity	1	24	0.812438	0.958585	116695	Kcnd1
GO:0015144	carbohydrate transmembrane transporter activity	1	24	0.812438	0.958585	24778	Slc2a1
GO:1901476	carbohydrate transporter activity	1	24	0.812438	0.958585	24778	Slc2a1
GO:0017016	Ras GTPase binding	8	151	0.814286	0.958585	83620;360034;25553;64041;302538;25017;364018;310621	Cit;Myrip;Slc6a4;Birc5;Sytl5;Myo5a;Ncf2;Iqgap3
GO:0004842	ubiquitin-protein transferase activity	11	201	0.81447	0.958585	64557;316395;140939;363790;296368;497672;316129;292699;360847;316326;291597	Bard1;Hecw2;Trim63;Fbxo40;Ube2c;Brca1;Uhrf1;Cblc;Ube2t;Neurl3;Trim36
GO:1901981	phosphatidylinositol phosphate binding	4	83	0.822299	0.965439	81639;306283;316521;315298	Alox15;Anxa8;Vil1;Racgap1
GO:0048365	Rac GTPase binding	1	25	0.824583	0.965439	364018	Ncf2
GO:0001540	beta-amyloid binding	1	25	0.824583	0.965439	25728	Apoe
GO:0031072	heat shock protein binding	3	65	0.824691	0.965439	81726;54237;24599	Mvd;Cdk1;Nos2
GO:0003677	DNA binding	83	1329	0.832893	0.96956	85497;684762;81819;292060;25334;299210;100910554;64647;311723;680615;79431;689399;24890;312897;291159;65199;684841;316129;100360950;680097;100359692;100912290;24571;291157;291100;293502;296344;25154;291885;252915;29728;100910200;691488;170897;288079;502125;304988;26296;298850;100360754;306970;113898;497672;502129;687536;291145;361247;360243;58940;155430;500987;317252;680312;114090;191575;363227;2…	Klf15;LOC684762;Pax8;Irf8;Bhlha15;Esrrb;LOC100910554;Hist1h2bl;Sox18;Hist1h2ak;Bhlhe40;Cenpw;Esr1;Msc;Hist1h2ail;Kcnip3;LOC684841;Uhrf1;LOC100360950;LOC680097;LOC100359692;LOC100912290;Muc1;Hist1h2bo;Irf4;Kif22;Mybl2;Pgr;Mcm5;Mxd3;Mcm4;LOC100910200;Hist3h2bb;Sphk1;Polq;Hist1h2ah;Mnda;Tfec;Cenpa;LOC100360754;Hist1h2an;Prdx5;Brca1;Hist1h2ai;Foxf1;Hist1h1a;Hist1h2bd;Top2a;H2afz;Hey2;H2afx;Ercc6l;His…
GO:0051020	GTPase binding	9	172	0.834674	0.96956	83620;360034;50592;25553;64041;302538;25017;364018;310621	Cit;Myrip;Gria1;Slc6a4;Birc5;Sytl5;Myo5a;Ncf2;Iqgap3
GO:0019888	protein phosphatase regulator activity	2	47	0.834771	0.96956	307472;259225	Sh3rf2;Ppp1r14b
GO:0046915	transition metal ion transmembrane transporter activity	1	26	0.835942	0.96956	306009	Slc39a14
GO:0070888	E-box binding	1	26	0.835942	0.96956	79431	Bhlhe40
GO:0043531	ADP binding	1	26	0.835942	0.96956	266714	Myo7a
GO:0033764	steroid dehydrogenase activity, acting on the CH-OH group of donors, NAD or NADP as acceptor	1	26	0.835942	0.96956	170635	Dhrs9
GO:0070491	repressing transcription factor binding	2	48	0.843034	0.97521	688090;291137	RT1-Bb;Gmnn
GO:0019209	kinase activator activity	2	48	0.843034	0.97521	117038;24482	Mt3;Igf1
GO:0005164	tumor necrosis factor receptor binding	1	27	0.846566	0.975439	353218	Tnfsf9
GO:0034061	DNA polymerase activity	1	27	0.846566	0.975439	288079	Polq
GO:1901505	carbohydrate derivative transporter activity	1	27	0.846566	0.975439	63997	Slc29a1
GO:0008757	S-adenosylmethionine-dependent methyltransferase activity	4	87	0.847961	0.975766	368066;291100;300691;690050	Inmt;Irf4;Nnmt;Tpmt
GO:0033293	monocarboxylic acid binding	2	49	0.850921	0.97789	316521;140868	Vil1;Fabp5
GO:0042393	histone binding	5	106	0.852323	0.978222	304648;316129;307106;79223;500987	Asf1b;Uhrf1;Sfmbt2;Gk;H2afx
GO:0031492	nucleosomal DNA binding	1	28	0.856501	0.980454	58940	H2afz
GO:0019213	deacetylase activity	1	28	0.856501	0.980454	302972	Amdhd2
GO:0019903	protein phosphatase binding	5	108	0.862727	0.984773	191573;307472;114482;170897;311167	Grin3a;Sh3rf2;Nek2;Sphk1;Smtnl1
GO:0004712	protein serine/threonine/tyrosine kinase activity	1	29	0.865794	0.984773	315852	Ttk
GO:0071855	neuropeptide receptor binding	1	29	0.865794	0.984773	58812	Apln
GO:0031625	ubiquitin protein ligase binding	8	162	0.865882	0.984773	83516;364754;497672;114090;360847;688090;64625;498840	Ppargc1a;Fzd8;Brca1;Egr2;Ube2t;RT1-Bb;Bid;Tmem173
GO:0044389	small conjugating protein ligase binding	8	162	0.865882	0.984773	83516;364754;497672;114090;360847;688090;64625;498840	Ppargc1a;Fzd8;Brca1;Egr2;Ube2t;RT1-Bb;Bid;Tmem173
GO:0016879	ligase activity, forming carbon-nitrogen bonds	4	91	0.870414	0.987135	298692;360847;296368;362415	Ttll10;Ube2t;Ube2c;Ttll3
GO:0019887	protein kinase regulator activity	4	91	0.870414	0.987135	117038;24599;498709;24482	Mt3;Nos2;Cks2;Igf1
GO:0004721	phosphoprotein phosphatase activity	6	128	0.871732	0.987135	64576;311406;116680;246781;289997;289993	Ptprv;Dusp2;Ptpru;Ptpn7;Dlgap5;Cdkn3
GO:0004527	exonuclease activity	2	52	0.872456	0.987135	310395;54410	Ccr4;Enpp3
GO:0043022	ribosome binding	1	30	0.874484	0.988156	298068	Sec61b
GO:0019208	phosphatase regulator activity	2	53	0.878973	0.991951	307472;259225	Sh3rf2;Ppp1r14b
GO:0003690	double-stranded DNA binding	4	93	0.880527	0.99243	24883;304988;499870;316129	Wt1;Mnda;Rad51;Uhrf1
GO:0004520	endodeoxyribonuclease activity	1	31	0.882612	0.993504	298884	Gen1
GO:0032553	ribonucleotide binding	86	1411	0.886717	0.996847	29597;89813;29599;29213;81726;353250;246118;289185;84492;498840;365042;89804;360243;294071;117558;362510;191575;25515;83620;89788;83783;294286;60450;288026;25589;25059;24834;25054;54237;365298;25686;291885;29728;81743;116720;63843;113976;360621;691998;291081;29437;500377;171576;289777;315852;24212;24213;360161;24891;170897;310344;306811;24599;293693;307415;300218;296137;29244;307351;64626;499870;…	P2ry2;Pdk4;Atp2b3;Tubb4a;Mvd;Niacr1;Tubb3;Creg1;Tec;Tmem173;Rab32;Tek;Top2a;Hells;Mylk2;Melk;Nme1;Plk1;Cit;Gna15;Sult1a1;Kifc1;Matk;Atp13a4;Kdr;Hk2;Tk1;Ntrk2;Cdk1;Alpk3;Gnai1;Mcm5;Mcm4;Pde2a;Pik3c2g;P2ry4;Acsl4;Cdc6;Nlrp1b;Tubb2b;Acta1;Tuba8;Bub1b;Fignl1;Ttk;Atp1a2;Atp1a3;Nek6;Abcb4;Sphk1;Plk4;Wnk2;Nos2;Cdc42bpg;RGD1309362;Tuba1c;Bub1;Gch1;Tubb6;Rem2;Rad51;Pbk;Ercc6l;Hk3;Nek2;Abcb1a;Rasd2;Myo5a;K…
GO:0008408	3'-5' exonuclease activity	1	32	0.890213	0.99793	310395	Ccr4
GO:0046332	SMAD binding	2	55	0.891091	0.99793	84032;29610	Col3a1;Tgfbr3
GO:0001078	RNA polymerase II core promoter proximal region sequence-specific DNA binding transcription factor activity involved in negative regulation of transcription	2	55	0.891091	0.99793	79431;366126	Bhlhe40;Spi1
GO:0008170	N-methyltransferase activity	2	56	0.896717	0.999809	291100;300691	Irf4;Nnmt
GO:0016278	lysine N-methyltransferase activity	1	33	0.897323	0.999809	291100	Irf4
GO:0016279	protein-lysine N-methyltransferase activity	1	33	0.897323	0.999809	291100	Irf4
GO:0030374	ligand-dependent nuclear receptor transcription coactivator activity	1	33	0.897323	0.999809	83516	Ppargc1a
GO:0032559	adenyl ribonucleotide binding	65	1095	0.899483	1	29597;361308;171576;289777;24834;25054;315852;89804;114482;29599;24212;24213;171529;24649;170913;317252;360161;25017;24891;81726;365298;25059;171304;291885;29728;310344;170897;288079;117596;306811;81743;63843;25515;84492;691998;498840;25060;116720;360243;294071;54237;89813;117558;362510;191575;25589;293502;685232;192249;290326;113976;83620;293693;360621;292206;296137;294286;60450;288026;83783;309…	P2ry2;Kif20a;Bub1b;Fignl1;Tk1;Ntrk2;Ttk;Tek;Nek2;Atp2b3;Atp1a2;Atp1a3;Kif2c;Pim1;Abcb1a;Ercc6l;Nek6;Myo5a;Abcb4;Mvd;Alpk3;Hk2;Kif11;Mcm5;Mcm4;Plk4;Sphk1;Polq;Atp6v1b2;Wnk2;Pde2a;P2ry4;Plk1;Tec;Nlrp1b;Tmem173;Hk3;Pik3c2g;Top2a;Hells;Cdk1;Pdk4;Mylk2;Melk;Nme1;Kdr;Kif22;Atp6v1a;Ehd3;Pbk;Acsl4;Cit;Cdc42bpg;Cdc6;Trip13;Bub1;Kifc1;Matk;Atp13a4;Sult1a1;Kif20b;Gk;Myo7a;Acta1;Rad51
GO:0016763	transferase activity, transferring pentosyl groups	1	34	0.903971	1	293504	Qprt
GO:0030554	adenyl nucleotide binding	66	1115	0.905114	1	29597;361308;171576;289777;24834;25054;315852;89804;114482;29599;24212;24213;171529;24649;301518;170913;317252;360161;25017;24891;81726;365298;25059;171304;291885;29728;310344;170897;288079;117596;306811;81743;63843;25515;84492;691998;498840;25060;116720;360243;294071;54237;89813;117558;362510;191575;25589;293502;685232;192249;290326;113976;83620;293693;360621;292206;296137;294286;60450;288026;83…	P2ry2;Kif20a;Bub1b;Fignl1;Tk1;Ntrk2;Ttk;Tek;Nek2;Atp2b3;Atp1a2;Atp1a3;Kif2c;Pim1;Prkag3;Abcb1a;Ercc6l;Nek6;Myo5a;Abcb4;Mvd;Alpk3;Hk2;Kif11;Mcm5;Mcm4;Plk4;Sphk1;Polq;Atp6v1b2;Wnk2;Pde2a;P2ry4;Plk1;Tec;Nlrp1b;Tmem173;Hk3;Pik3c2g;Top2a;Hells;Cdk1;Pdk4;Mylk2;Melk;Nme1;Kdr;Kif22;Atp6v1a;Ehd3;Pbk;Acsl4;Cit;Cdc42bpg;Cdc6;Trip13;Bub1;Kifc1;Matk;Atp13a4;Sult1a1;Kif20b;Gk;Myo7a;Acta1;Rad51
GO:0043167	ion binding	266	4166	0.906646	1	29597;85497;89813;140868;298282;293154;29599;29213;302976;84387;25503;24493;24310;245920;81726;353250;286896;246118;361623;25335;315298;29692;81869;289185;305253;29610;24962;83731;29292;84492;84493;498840;498335;58962;89804;360243;294071;89788;191573;117558;362510;191575;66015;312705;24787;54282;24770;24299;83627;266684;25515;83620;117038;50671;25544;83783;294286;297814;60450;89784;81639;192262;2…	P2ry2;Klf15;Pdk4;Fabp5;Oma1;Folr2;Atp2b3;Tubb4a;Noxo1;Pglyrp1;Ocm2;Il1a;Ace;Cxcl10;Mvd;Niacr1;Sgpl1;Tubb3;Trim66;Mmp7;Racgap1;Pla2g2a;Gstm7;Creg1;Adamts3;Tgfbr3;Cth;Kcnma1;Ftl1;Tec;Fmo3;Tmem173;Cxcl13;Hpgds;Tek;Top2a;Hells;Gna15;Grin3a;Mylk2;Melk;Nme1;Adamts4;C1r;Sod2;Padi1;Ccl2;Cyp2a3;Galnt5;Cyp2d1;Plk1;Cit;Mt3;Fasn;Sele;Sult1a1;Kifc1;Car8;Matk;Idi1;Alox15;C1s;Pdlim4;Mmp14;Kdr;Prnd;Duox1;Apoe;Hk…
GO:0008270	zinc ion binding	48	833	0.907174	1	64557;25154;299210;24834;56777;117038;360772;64041;63849;84387;316129;117033;24890;304608;81687;307472;293783;361623;25335;363790;54242;292699;24310;303596;81707;305253;365377;691657;691857;291597;140939;66015;24883;113936;25383;679837;361303;316326;311827;50671;29244;297814;29242;296156;497672;24915;689415;295498	Bard1;Pgr;Esrrb;Tk1;Adam1a;Mt3;Zfand2a;Birc5;Mmp8;Pglyrp1;Uhrf1;Mmp12;Esr1;Mmp19;Mmp9;Sh3rf2;Lpxn;Trim66;Mmp7;Fbxo40;Cpa3;Cblc;Ace;March10;Mmp14;Adamts3;Trim72;Crip1;Pygo1;Trim36;Trim63;Adamts4;Wt1;Cpb2;Apobec1;Adam12;Lims2;Neurl3;Adamtsl2;Fasn;Gch1;Car8;Car4;Cpxm1;Brca1;Pdlim4;Mt2A;Adh6a
GO:0004722	protein serine/threonine phosphatase activity	1	35	0.91019	1	289993	Cdkn3
GO:0008138	protein tyrosine/serine/threonine phosphatase activity	1	35	0.91019	1	311406	Dusp2
GO:0001883	purine nucleoside binding	82	1370	0.911398	1	500377;29597;361308;171576;289777;292206;24834;25054;315852;89804;114482;29599;24212;24213;29213;171529;24649;170913;317252;360161;25017;24891;81726;288079;25059;171304;291885;246118;29728;310344;170897;307415;117596;25686;306811;63843;29290;25515;171099;691998;365901;84492;365042;501854;25060;116720;360243;294071;54237;89813;117558;362510;191575;25589;293502;100909441;685232;192249;290326;113976…	Tuba8;P2ry2;Kif20a;Bub1b;Fignl1;Trip13;Tk1;Ntrk2;Ttk;Tek;Nek2;Atp2b3;Atp1a2;Atp1a3;Tubb4a;Kif2c;Pim1;Abcb1a;Ercc6l;Nek6;Myo5a;Abcb4;Mvd;Polq;Hk2;Kif11;Mcm5;Tubb3;Mcm4;Plk4;Sphk1;RGD1309362;Atp6v1b2;Gnai1;Wnk2;P2ry4;Adora1;Plk1;Rasd2;Nlrp1b;Gnat2;Tec;Rab32;Rab7b;Hk3;Pik3c2g;Top2a;Hells;Cdk1;Pdk4;Mylk2;Melk;Nme1;Kdr;Kif22;LOC100909441;Atp6v1a;Ehd3;Pbk;Acsl4;Cit;Gna15;Cdc42bpg;Arl11;Cdc6;Niacr1;Tuba…
GO:0008134	transcription factor binding	18	349	0.912721	1	83516;291137;366126;299210;54264;114090;79431;29452;24649;367166;140586;289185;497009;155430;292301;688090;24890;498840	Ppargc1a;Gmnn;Spi1;Esrrb;Mafb;Egr2;Bhlhe40;Epas1;Pim1;Hyal1;Sox9;Creg1;Naaa;Hey2;T;RT1-Bb;Esr1;Tmem173
GO:0008022	protein C-terminus binding	7	158	0.914719	1	360243;192213;64515;65199;83567;499870;364018	Top2a;Rasgrf1;Cdc20;Kcnip3;Mchr1;Rad51;Ncf2
GO:0016407	acetyltransferase activity	3	81	0.915019	1	50671;171084;308100	Fasn;Nat8;Acat2
GO:0005524	ATP binding	62	1063	0.918159	1	29597;361308;171576;289777;24834;25054;315852;89804;114482;29599;24212;24213;171529;24649;170913;317252;360161;25017;24891;81726;365298;25059;171304;291885;29728;310344;170897;288079;117596;306811;63843;113976;84492;290326;25060;116720;360243;294071;54237;89813;117558;362510;191575;25589;293502;685232;192249;25515;83620;293693;360621;292206;296137;294286;60450;288026;691998;309523;79223;266714;29…	P2ry2;Kif20a;Bub1b;Fignl1;Tk1;Ntrk2;Ttk;Tek;Nek2;Atp2b3;Atp1a2;Atp1a3;Kif2c;Pim1;Abcb1a;Ercc6l;Nek6;Myo5a;Abcb4;Mvd;Alpk3;Hk2;Kif11;Mcm5;Mcm4;Plk4;Sphk1;Polq;Atp6v1b2;Wnk2;P2ry4;Acsl4;Tec;Pbk;Hk3;Pik3c2g;Top2a;Hells;Cdk1;Pdk4;Mylk2;Melk;Nme1;Kdr;Kif22;Atp6v1a;Ehd3;Plk1;Cit;Cdc42bpg;Cdc6;Trip13;Bub1;Kifc1;Matk;Atp13a4;Nlrp1b;Kif20b;Gk;Myo7a;Acta1;Rad51
GO:0032813	tumor necrosis factor receptor superfamily binding	1	37	0.921445	1	353218	Tnfsf9
GO:0032555	purine ribonucleotide binding	83	1396	0.92208	1	500377;29597;361308;171576;289777;292206;24834;25054;315852;89804;114482;29599;24212;24213;29213;171529;24649;170913;317252;360161;25017;24891;81726;288079;25059;171304;291885;246118;29728;310344;170897;307415;117596;25686;306811;81743;63843;309523;25515;171099;691998;365901;498840;365042;501854;25060;116720;360243;294071;54237;89813;117558;362510;191575;25589;293502;100909441;685232;192249;29032…	Tuba8;P2ry2;Kif20a;Bub1b;Fignl1;Trip13;Tk1;Ntrk2;Ttk;Tek;Nek2;Atp2b3;Atp1a2;Atp1a3;Tubb4a;Kif2c;Pim1;Abcb1a;Ercc6l;Nek6;Myo5a;Abcb4;Mvd;Polq;Hk2;Kif11;Mcm5;Tubb3;Mcm4;Plk4;Sphk1;RGD1309362;Atp6v1b2;Gnai1;Wnk2;Pde2a;P2ry4;Kif20b;Plk1;Rasd2;Nlrp1b;Gnat2;Tmem173;Rab32;Rab7b;Hk3;Pik3c2g;Top2a;Hells;Cdk1;Pdk4;Mylk2;Melk;Nme1;Kdr;Kif22;LOC100909441;Atp6v1a;Ehd3;Pbk;Acsl4;Cit;Gna15;Cdc42bpg;Arl11;Cdc6;N…
GO:0001882	nucleoside binding	82	1382	0.92364	1	500377;29597;361308;171576;289777;292206;24834;25054;315852;89804;114482;29599;24212;24213;29213;171529;24649;170913;317252;360161;25017;24891;81726;288079;25059;171304;291885;246118;29728;310344;170897;307415;117596;25686;306811;63843;29290;25515;171099;691998;365901;84492;365042;501854;25060;116720;360243;294071;54237;89813;117558;362510;191575;25589;293502;100909441;685232;192249;290326;113976…	Tuba8;P2ry2;Kif20a;Bub1b;Fignl1;Trip13;Tk1;Ntrk2;Ttk;Tek;Nek2;Atp2b3;Atp1a2;Atp1a3;Tubb4a;Kif2c;Pim1;Abcb1a;Ercc6l;Nek6;Myo5a;Abcb4;Mvd;Polq;Hk2;Kif11;Mcm5;Tubb3;Mcm4;Plk4;Sphk1;RGD1309362;Atp6v1b2;Gnai1;Wnk2;P2ry4;Adora1;Plk1;Rasd2;Nlrp1b;Gnat2;Tec;Rab32;Rab7b;Hk3;Pik3c2g;Top2a;Hells;Cdk1;Pdk4;Mylk2;Melk;Nme1;Kdr;Kif22;LOC100909441;Atp6v1a;Ehd3;Pbk;Acsl4;Cit;Gna15;Cdc42bpg;Arl11;Cdc6;Niacr1;Tuba…
GO:0032550	purine ribonucleoside binding	81	1367	0.924243	1	500377;29597;361308;171576;289777;292206;24834;25054;315852;89804;114482;29599;24212;24213;29213;171529;24649;170913;317252;360161;25017;24891;81726;288079;25059;171304;291885;246118;29728;310344;170897;307415;117596;25686;306811;63843;309523;25515;171099;691998;365901;84492;365042;501854;25060;116720;360243;294071;54237;89813;117558;362510;191575;25589;293502;100909441;685232;192249;290326;11397…	Tuba8;P2ry2;Kif20a;Bub1b;Fignl1;Trip13;Tk1;Ntrk2;Ttk;Tek;Nek2;Atp2b3;Atp1a2;Atp1a3;Tubb4a;Kif2c;Pim1;Abcb1a;Ercc6l;Nek6;Myo5a;Abcb4;Mvd;Polq;Hk2;Kif11;Mcm5;Tubb3;Mcm4;Plk4;Sphk1;RGD1309362;Atp6v1b2;Gnai1;Wnk2;P2ry4;Kif20b;Plk1;Rasd2;Nlrp1b;Gnat2;Tec;Rab32;Rab7b;Hk3;Pik3c2g;Top2a;Hells;Cdk1;Pdk4;Mylk2;Melk;Nme1;Kdr;Kif22;LOC100909441;Atp6v1a;Ehd3;Pbk;Acsl4;Cit;Gna15;Cdc42bpg;Arl11;Cdc6;Niacr1;Tuba…
GO:0019842	vitamin binding	2	62	0.92516	1	171049;293154	Folr1;Folr2
GO:0017076	purine nucleotide binding	84	1417	0.927156	1	500377;29597;361308;171576;289777;292206;24834;25054;315852;89804;114482;29599;24212;24213;29213;171529;24649;301518;170913;317252;360161;25017;24891;81726;288079;25059;171304;291885;246118;29728;310344;170897;307415;117596;25686;306811;81743;63843;309523;25515;171099;691998;365901;498840;365042;501854;25060;116720;360243;294071;54237;89813;117558;362510;191575;25589;293502;100909441;685232;19224…	Tuba8;P2ry2;Kif20a;Bub1b;Fignl1;Trip13;Tk1;Ntrk2;Ttk;Tek;Nek2;Atp2b3;Atp1a2;Atp1a3;Tubb4a;Kif2c;Pim1;Prkag3;Abcb1a;Ercc6l;Nek6;Myo5a;Abcb4;Mvd;Polq;Hk2;Kif11;Mcm5;Tubb3;Mcm4;Plk4;Sphk1;RGD1309362;Atp6v1b2;Gnai1;Wnk2;Pde2a;P2ry4;Kif20b;Plk1;Rasd2;Nlrp1b;Gnat2;Tmem173;Rab32;Rab7b;Hk3;Pik3c2g;Top2a;Hells;Cdk1;Pdk4;Mylk2;Melk;Nme1;Kdr;Kif22;LOC100909441;Atp6v1a;Ehd3;Pbk;Acsl4;Cit;Gna15;Cdc42bpg;Arl11…
GO:0032549	ribonucleoside binding	81	1371	0.928006	1	500377;29597;361308;171576;289777;292206;24834;25054;315852;89804;114482;29599;24212;24213;29213;171529;24649;170913;317252;360161;25017;24891;81726;288079;25059;171304;291885;246118;29728;310344;170897;307415;117596;25686;306811;63843;309523;25515;171099;691998;365901;84492;365042;501854;25060;116720;360243;294071;54237;89813;117558;362510;191575;25589;293502;100909441;685232;192249;290326;11397…	Tuba8;P2ry2;Kif20a;Bub1b;Fignl1;Trip13;Tk1;Ntrk2;Ttk;Tek;Nek2;Atp2b3;Atp1a2;Atp1a3;Tubb4a;Kif2c;Pim1;Abcb1a;Ercc6l;Nek6;Myo5a;Abcb4;Mvd;Polq;Hk2;Kif11;Mcm5;Tubb3;Mcm4;Plk4;Sphk1;RGD1309362;Atp6v1b2;Gnai1;Wnk2;P2ry4;Kif20b;Plk1;Rasd2;Nlrp1b;Gnat2;Tec;Rab32;Rab7b;Hk3;Pik3c2g;Top2a;Hells;Cdk1;Pdk4;Mylk2;Melk;Nme1;Kdr;Kif22;LOC100909441;Atp6v1a;Ehd3;Pbk;Acsl4;Cit;Gna15;Cdc42bpg;Arl11;Cdc6;Niacr1;Tuba…
GO:0004518	nuclease activity	5	125	0.928588	1	298884;310395;191575;292306;54410	Gen1;Ccr4;Nme1;Rnaset2;Enpp3
GO:0036094	small molecule binding	123	2027	0.930851	1	29597;89813;140868;293154;29599;679975;29213;81726;353250;246118;81869;289185;24848;29290;84492;84493;498840;365042;89804;360243;294071;191573;117558;362510;191575;25515;83620;89788;24383;50671;25544;83783;294286;60450;288026;25589;170897;24834;25054;54237;365377;365298;25686;29230;291885;29728;24891;29637;81743;24479;116720;63843;113976;100363469;360621;246245;691998;291081;66021;29437;171049;50…	P2ry2;Pdk4;Fabp5;Folr2;Atp2b3;Gpr183;Tubb4a;Mvd;Niacr1;Tubb3;Gstm7;Creg1;Tph1;Adora1;Tec;Fmo3;Tmem173;Rab32;Tek;Top2a;Hells;Grin3a;Mylk2;Melk;Nme1;Plk1;Cit;Gna15;Gapdh;Fasn;Sele;Sult1a1;Kifc1;Matk;Atp13a4;Kdr;Sphk1;Tk1;Ntrk2;Cdk1;Trim72;Alpk3;Gnai1;Sqle;Mcm5;Mcm4;Abcb4;Hmgcs1;Pde2a;Idh1;Pik3c2g;P2ry4;Acsl4;LOC100363469;Cdc6;Fmo2;Nlrp1b;Tubb2b;Cybb;Acta1;Folr1;Tuba8;Bub1b;Fignl1;Ttk;Srd5a1;Atp1a2;…
GO:0003714	transcription corepressor activity	4	106	0.930945	1	64160;314818;79431;291137	Basp1;E2f7;Bhlhe40;Gmnn
GO:0005080	protein kinase C binding	1	39	0.931289	1	360243	Top2a
GO:0035639	purine ribonucleoside triphosphate binding	80	1359	0.931335	1	500377;29597;361308;171576;289777;292206;24834;25054;315852;89804;114482;29599;24212;24213;29213;171529;24649;170913;317252;360161;25017;24891;81726;288079;25059;171304;291885;246118;29728;310344;170897;307415;117596;25686;306811;63843;309523;25515;171099;290326;365901;84492;365042;501854;25060;116720;360243;294071;54237;89813;117558;362510;191575;25589;293502;100909441;685232;192249;113976;83620…	Tuba8;P2ry2;Kif20a;Bub1b;Fignl1;Trip13;Tk1;Ntrk2;Ttk;Tek;Nek2;Atp2b3;Atp1a2;Atp1a3;Tubb4a;Kif2c;Pim1;Abcb1a;Ercc6l;Nek6;Myo5a;Abcb4;Mvd;Polq;Hk2;Kif11;Mcm5;Tubb3;Mcm4;Plk4;Sphk1;RGD1309362;Atp6v1b2;Gnai1;Wnk2;P2ry4;Kif20b;Plk1;Rasd2;Pbk;Gnat2;Tec;Rab32;Rab7b;Hk3;Pik3c2g;Top2a;Hells;Cdk1;Pdk4;Mylk2;Melk;Nme1;Kdr;Kif22;LOC100909441;Atp6v1a;Ehd3;Acsl4;Cit;Gna15;Cdc42bpg;Arl11;Cdc6;Niacr1;Tuba1c;Tubb…
GO:0043565	sequence-specific DNA binding	33	610	0.932566	1	81819;25334;299210;29452;312897;65199;316129;304815;24890;24571;296344;25154;266813;54264;687536;360243;58940;155430;291100;191575;24883;314818;691657;311723;117232;299206;361514;366126;83516;315341;140586;292301;366949	Pax8;Bhlha15;Esrrb;Epas1;Msc;Kcnip3;Uhrf1;Elf3;Esr1;Muc1;Mybl2;Pgr;Prrx1;Mafb;Foxf1;Top2a;H2afz;Hey2;Irf4;Nme1;Wt1;E2f7;Crip1;Sox18;Barhl1;Batf;Meis3;Spi1;Ppargc1a;Hoxc5;Sox9;T;Mafa
GO:0046872	metal ion binding	160	2599	0.932892	1	85497;298282;29599;84387;25503;24493;24310;361623;25335;315298;29692;362474;83731;29292;360034;58962;305253;360243;89788;362510;191575;66015;312705;24787;54282;266684;113910;83620;117038;50671;83627;297814;89784;81639;24915;25728;170897;24834;59267;100360781;64041;63849;83791;83792;246074;296184;25686;306071;288026;79126;170955;293783;84032;79129;81743;24773;291597;24479;365377;691857;500446;1409…	Klf15;Oma1;Atp2b3;Pglyrp1;Ocm2;Il1a;Ace;Trim66;Mmp7;Racgap1;Pla2g2a;Adhfe1;Kcnma1;Ftl1;Myrip;Hpgds;Adamts3;Top2a;Gna15;Melk;Nme1;Adamts4;C1r;Sod2;Padi1;Cyp2d1;Prnd;Cit;Mt3;Fasn;Galnt5;Car8;Idi1;Alox15;Pdlim4;Apoe;Sphk1;Tk1;Syt7;LOC100360781;Birc5;Mmp8;Fdps;Scd;Scd1;Ankef1;Gnai1;Lcp1;Atp13a4;Cfi;Zfp483;Lpxn;Col3a1;Cyba;Pde2a;Sftpa1;Trim36;Idh1;Trim72;Pygo1;RGD1559864;Trim63;Acp5;Spon2;Steap3;Tbxas…
GO:0008194	UDP-glycosyltransferase activity	3	86	0.932972	1	367166;25694;83627	Hyal1;Has2;Galnt5
GO:0019902	phosphatase binding	6	146	0.933178	1	307472;170897;191573;311167;114482;288512	Sh3rf2;Sphk1;Grin3a;Smtnl1;Nek2;Elfn1
GO:0035064	methylated histone binding	1	40	0.935738	1	316129	Uhrf1
GO:0005488	binding	565	8713	0.938732	1	684984;500996;65154;500337;689399;679975;29213;81819;286896;361623;315611;315615;294883;497009;54264;25060;360243;311406;117558;25349;54282;60350;113910;83620;361537;83627;83783;29455;29452;306636;100365043;29200;292301;292306;25524;24834;64515;298068;117254;100360781;50592;365298;117258;502852;24571;56765;24375;100910554;117099;24904;288504;63848;365377;26989;50719;89824;63843;140939;362431;2488…	Cd300lg;Layn;Wisp1;Clec1a;Cenpw;Gpr183;Tubb4a;Pax8;Sgpl1;Trim66;Scn4b;Dscaml1;Ralyl;Naaa;Mafb;Hk3;Top2a;Dusp2;Mylk2;Scn2b;Padi1;Cd14;Prnd;Cit;Tyrobp;Galnt5;Sult1a1;Gdf15;Epas1;Efnb2;LOC100365043;Inhba;T;Rnaset2;Psap;Tk1;Cdc20;Sec61b;Prdx1;LOC100360781;Gria1;Alpk3;Cntn1;Cd207;Muc1;Plvap;Fuca1;LOC100910554;Bdh1;Slc22a1;Snx8;Fxyd7;Trim72;Cadps;Slc7a5;Chi3l1;P2ry4;Trim63;Clec4a3;Wt1;Tbxas1;LOC1003609…
GO:0015085	calcium ion transmembrane transporter activity	3	88	0.939119	1	191573;29465;29599	Grin3a;Trpv2;Atp2b3
GO:0019207	kinase regulator activity	4	109	0.939425	1	117038;24599;498709;24482	Mt3;Nos2;Cks2;Igf1
GO:0005198	structural molecule activity	27	519	0.943041	1	500377;64348;361923;100360781;29213;690625;315318;290485;308709;102555453;246118;84032;54227;363265;29393;25654;60379;299106;100909441;100363469;24171;300218;307351;24366;24367;291081;81772	Tuba8;Cryba4;Rpl22l1;LOC100360781;Tubb4a;Oc90;Krt80;Cldn10;Synm;LOC102555453;Tubb3;Col3a1;Arpc1b;Col4a3;Col1a1;Col11a1;Col5a3;Rpl10l;LOC100909441;LOC100363469;Add2;Tuba1c;Tubb6;Fgb;Fgg;Tubb2b;Rps9
GO:0005089	Rho guanyl-nucleotide exchange factor activity	1	42	0.943791	1	192213	Rasgrf1
GO:0002039	p53 binding	1	42	0.943791	1	24571	Muc1
GO:0016772	transferase activity, transferring phosphorus-containing groups	40	739	0.948526	1	171576;25059;24834;25054;315852;89804;114482;25203;25542;360161;81726;365298;170897;310344;301518;288079;306811;29610;304334;84492;290326;25060;116720;54237;89813;117558;498709;191575;362510;367146;25515;83620;293693;287562;296137;60450;24649;140586;79223;25589	Bub1b;Hk2;Tk1;Ntrk2;Ttk;Tek;Nek2;Ccnb1;Ccl3;Nek6;Mvd;Alpk3;Sphk1;Plk4;Prkag3;Polq;Wnk2;Tgfbr3;Fam20c;Tec;Pbk;Hk3;Pik3c2g;Cdk1;Pdk4;Mylk2;Cks2;Nme1;Melk;Gk5;Plk1;Cit;Cdc42bpg;Ccl12;Bub1;Matk;Pim1;Sox9;Gk;Kdr
GO:0072509	divalent inorganic cation transmembrane transporter activity	4	113	0.949254	1	191573;306009;29465;29599	Grin3a;Slc39a14;Trpv2;Atp2b3
GO:0043169	cation binding	162	2668	0.953921	1	85497;298282;29599;84387;25503;24493;24310;361623;25335;315298;29692;362474;83731;29292;360034;58962;305253;360243;89788;191573;362510;191575;66015;312705;24787;54282;266684;113910;83620;117038;50671;83627;297814;89784;81639;24915;25728;170897;24834;59267;100360781;64041;63849;83791;83792;246074;296184;25686;306071;288026;79126;170955;293783;84032;79129;81743;24773;291597;24479;365377;691857;5004…	Klf15;Oma1;Atp2b3;Pglyrp1;Ocm2;Il1a;Ace;Trim66;Mmp7;Racgap1;Pla2g2a;Adhfe1;Kcnma1;Ftl1;Myrip;Hpgds;Adamts3;Top2a;Gna15;Grin3a;Melk;Nme1;Adamts4;C1r;Sod2;Padi1;Cyp2d1;Prnd;Cit;Mt3;Fasn;Galnt5;Car8;Idi1;Alox15;Pdlim4;Apoe;Sphk1;Tk1;Syt7;LOC100360781;Birc5;Mmp8;Fdps;Scd;Scd1;Ankef1;Gnai1;Lcp1;Atp13a4;Cfi;Zfp483;Lpxn;Col3a1;Cyba;Pde2a;Sftpa1;Trim36;Idh1;Trim72;Pygo1;RGD1559864;Trim63;Acp5;Spon2;Steap…
GO:0004519	endonuclease activity	2	71	0.95433	1	298884;292306	Gen1;Rnaset2
GO:0016758	transferase activity, transferring hexosyl groups	5	136	0.954478	1	367166;316583;25694;290638;83627	Hyal1;B3gnt7;Has2;B3gnt3;Galnt5
GO:0008227	G-protein coupled amine receptor activity	1	46	0.956997	1	25083	Adra2a
GO:0000166	nucleotide binding	105	1791	0.958586	1	29597;89813;29599;29213;81726;353250;246118;289185;84492;84493;498840;365042;89804;360243;294071;117558;362510;191575;25515;83620;89788;24383;50671;83783;294286;60450;288026;25589;25059;24834;25054;54237;365298;25686;29230;291885;29728;81743;24479;116720;63843;113976;100363469;360621;246245;691998;291081;66021;29437;500377;171576;289777;315852;24950;24212;24213;316129;360161;24891;170897;310344;3…	P2ry2;Pdk4;Atp2b3;Tubb4a;Mvd;Niacr1;Tubb3;Creg1;Tec;Fmo3;Tmem173;Rab32;Tek;Top2a;Hells;Mylk2;Melk;Nme1;Plk1;Cit;Gna15;Gapdh;Fasn;Sult1a1;Kifc1;Matk;Atp13a4;Kdr;Hk2;Tk1;Ntrk2;Cdk1;Alpk3;Gnai1;Sqle;Mcm5;Mcm4;Pde2a;Idh1;Pik3c2g;P2ry4;Acsl4;LOC100363469;Cdc6;Fmo2;Nlrp1b;Tubb2b;Cybb;Acta1;Tuba8;Bub1b;Fignl1;Ttk;Srd5a1;Atp1a2;Atp1a3;Uhrf1;Nek6;Abcb4;Sphk1;Plk4;Prkag3;Wnk2;Nos2;Ercc6l;Fmo1;Cdc42bpg;RGD1…
GO:1901265	nucleoside phosphate binding	105	1791	0.958586	1	29597;89813;29599;29213;81726;353250;246118;289185;84492;84493;498840;365042;89804;360243;294071;117558;362510;191575;25515;83620;89788;24383;50671;83783;294286;60450;288026;25589;25059;24834;25054;54237;365298;25686;29230;291885;29728;81743;24479;116720;63843;113976;100363469;360621;246245;691998;291081;66021;29437;500377;171576;289777;315852;24950;24212;24213;316129;360161;24891;170897;310344;3…	P2ry2;Pdk4;Atp2b3;Tubb4a;Mvd;Niacr1;Tubb3;Creg1;Tec;Fmo3;Tmem173;Rab32;Tek;Top2a;Hells;Mylk2;Melk;Nme1;Plk1;Cit;Gna15;Gapdh;Fasn;Sult1a1;Kifc1;Matk;Atp13a4;Kdr;Hk2;Tk1;Ntrk2;Cdk1;Alpk3;Gnai1;Sqle;Mcm5;Mcm4;Pde2a;Idh1;Pik3c2g;P2ry4;Acsl4;LOC100363469;Cdc6;Fmo2;Nlrp1b;Tubb2b;Cybb;Acta1;Tuba8;Bub1b;Fignl1;Ttk;Srd5a1;Atp1a2;Atp1a3;Uhrf1;Nek6;Abcb4;Sphk1;Plk4;Prkag3;Wnk2;Nos2;Ercc6l;Fmo1;Cdc42bpg;RGD1…
GO:0044325	ion channel binding	2	73	0.95914	1	315611;65199	Scn4b;Kcnip3
GO:0005262	calcium channel activity	2	73	0.95914	1	191573;29465	Grin3a;Trpv2
GO:0005088	Ras guanyl-nucleotide exchange factor activity	2	73	0.95914	1	310772;192213	Dennd2d;Rasgrf1
GO:0016791	phosphatase activity	8	203	0.966404	1	64576;311406;116680;309014;25732;246781;289997;289993	Ptprv;Dusp2;Ptpru;Ppapdc1a;Acp5;Ptpn7;Dlgap5;Cdkn3
GO:0051540	metal cluster binding	1	50	0.967099	1	54349	Aox1
GO:0051536	iron-sulfur cluster binding	1	50	0.967099	1	54349	Aox1
GO:0019003	GDP binding	1	52	0.971222	1	25686	Gnai1
GO:0016788	hydrolase activity, acting on ester bonds	27	553	0.973679	1	25330;64576;309014;362619;690625;29692;361527;291437;50559;361993;81743;29290;289997;24451;289993;311406;116680;25732;191575;298884;310395;50671;363781;246781;294422;292306;54410	Lipe;Ptprv;Ppapdc1a;Smpdl3b;Oc90;Pla2g2a;Pld3;Lipg;Acot1;Them5;Pde2a;Adora1;Dlgap5;Hmox1;Cdkn3;Dusp2;Ptpru;Acp5;Nme1;Gen1;Ccr4;Fasn;Plcxd2;Ptpn7;Smpdl3a;Rnaset2;Enpp3
GO:0008168	methyltransferase activity	5	149	0.973886	1	368066;291100;300691;690050;499465	Inmt;Irf4;Nnmt;Tpmt;Mettl24
GO:0004386	helicase activity	2	83	0.976742	1	29728;291885	Mcm4;Mcm5
GO:0008276	protein methyltransferase activity	1	57	0.979409	1	291100	Irf4
GO:0016741	transferase activity, transferring one-carbon groups	5	155	0.979949	1	368066;291100;300691;690050;499465	Inmt;Irf4;Nnmt;Tpmt;Mettl24
GO:0070035	purine NTP-dependent helicase activity	1	58	0.980742	1	29728	Mcm4
GO:0008026	ATP-dependent helicase activity	1	58	0.980742	1	29728	Mcm4
GO:0051082	unfolded protein binding	1	61	0.984246	1	308857	Dnajb13
GO:0043130	ubiquitin binding	1	62	0.985267	1	360243	Top2a
GO:0005085	guanyl-nucleotide exchange factor activity	3	117	0.985878	1	310772;192213;500906	Dennd2d;Rasgrf1;Cyth4
GO:0001076	RNA polymerase II transcription factor binding transcription factor activity	2	92	0.986116	1	292301;79431	T;Bhlhe40
GO:0008080	N-acetyltransferase activity	1	69	0.990779	1	171084	Nat8
GO:0032182	small conjugating protein binding	1	71	0.991935	1	360243	Top2a
GO:0016757	transferase activity, transferring glycosyl groups	6	198	0.992214	1	293504;83627;290638;367166;316583;25694	Qprt;Galnt5;B3gnt3;Hyal1;B3gnt7;Has2
GO:0003712	transcription cofactor activity	10	286	0.993382	1	83516;291137;299210;293783;79431;314818;304988;64160;304815;24571	Ppargc1a;Gmnn;Esrrb;Lpxn;Bhlhe40;E2f7;Mnda;Basp1;Elf3;Muc1
GO:0003700	sequence-specific DNA binding transcription factor activity	30	670	0.994818	1	85497;81819;292060;25334;299210;25154;79431;312897;304815;24890;296344;170955;54264;81707;291100;155430;687536;24883;314818;311723;117232;299206;361514;366126;29452;315341;140586;114090;292301;366949	Klf15;Pax8;Irf8;Bhlha15;Esrrb;Pgr;Bhlhe40;Msc;Elf3;Esr1;Mybl2;Zfp483;Mafb;Mmp14;Irf4;Hey2;Foxf1;Wt1;E2f7;Sox18;Barhl1;Batf;Meis3;Spi1;Epas1;Hoxc5;Sox9;Egr2;T;Mafa
GO:0001071	nucleic acid binding transcription factor activity	30	670	0.994818	1	85497;81819;292060;25334;299210;25154;79431;312897;304815;24890;296344;170955;54264;81707;291100;155430;687536;24883;314818;311723;117232;299206;361514;366126;29452;315341;140586;114090;292301;366949	Klf15;Pax8;Irf8;Bhlha15;Esrrb;Pgr;Bhlhe40;Msc;Elf3;Esr1;Mybl2;Zfp483;Mafb;Mmp14;Irf4;Hey2;Foxf1;Wt1;E2f7;Sox18;Barhl1;Batf;Meis3;Spi1;Epas1;Hoxc5;Sox9;Egr2;T;Mafa
GO:0019904	protein domain specific binding	24	565	0.995361	1	317676;79431;25316;29599;364754;309760;295691;24392;29695;79129;29610;81743;292699;50592;65161;116649;24883;679837;364648;83620;266813;309523;114090;266714	Lat2;Bhlhe40;Ms4a2;Atp2b3;Fzd8;Mypn;Frzb;Gja1;Gabrr2;Cyba;Tgfbr3;Pde2a;Cblc;Gria1;Litaf;Kcnj4;Wt1;Adam12;Shcbp1;Cit;Prrx1;Kif20b;Egr2;Myo7a
GO:0000988	protein binding transcription factor activity	11	320	0.996073	1	83516;291137;299210;293783;79431;314818;304988;304815;64160;292301;24571	Ppargc1a;Gmnn;Esrrb;Lpxn;Bhlhe40;E2f7;Mnda;Elf3;Basp1;T;Muc1
GO:0000989	transcription factor binding transcription factor activity	11	320	0.996073	1	83516;291137;299210;293783;79431;314818;304988;304815;64160;292301;24571	Ppargc1a;Gmnn;Esrrb;Lpxn;Bhlhe40;E2f7;Mnda;Elf3;Basp1;T;Muc1
GO:0016410	N-acyltransferase activity	1	84	0.996622	1	171084	Nat8
GO:0047485	protein N-terminus binding	1	94	0.998271	1	266714	Myo7a
GO:0003729	mRNA binding	1	95	0.998383	1	310395	Ccr4
GO:0016779	nucleotidyltransferase activity	1	98	0.998677	1	288079	Polq
GO:0003713	transcription coactivator activity	3	165	0.998958	1	304815;83516;299210	Elf3;Ppargc1a;Esrrb
GO:0003735	structural constituent of ribosome	6	245	0.999122	1	100363469;102555453;361923;100360781;299106;81772	LOC100363469;LOC102555453;Rpl22l1;LOC100360781;Rpl10l;Rps9
GO:0016747	transferase activity, transferring acyl groups other than amino-acyl groups	3	171	0.999256	1	50671;171084;308100	Fasn;Nat8;Acat2
GO:0016746	transferase activity, transferring acyl groups	4	201	0.999359	1	50671;29637;171084;308100	Fasn;Hmgcs1;Nat8;Acat2
GO:0016740	transferase activity	79	1637	0.999601	1	64557;171576;29592;25059;58962;24834;25054;315852;89804;114482;117558;300691;290638;316129;25542;497672;316583;360161;307859;499302;499465;302489;81726;365298;287466;316395;367166;293504;363790;310344;296368;288079;81869;295934;306811;29637;29610;304334;360847;291597;84492;290326;368066;25060;116720;54237;89813;291100;140939;498709;191575;362510;292699;690050;24649;171084;114097;367146;316326;256…	Bard1;Bub1b;Bcat1;Hk2;Hpgds;Tk1;Ntrk2;Ttk;Tek;Nek2;Mylk2;Nnmt;B3gnt3;Uhrf1;Ccl3;Brca1;B3gnt7;Nek6;Chst5;Gal3st3;Mettl24;Hs6st2;Mvd;Alpk3;Wscd1;Hecw2;Hyal1;Qprt;Fbxo40;Plk4;Ube2c;Polq;Gstm7;Chst1;Wnk2;Hmgcs1;Tgfbr3;Fam20c;Ube2t;Trim36;Tec;Pbk;Inmt;Hk3;Pik3c2g;Cdk1;Pdk4;Irf4;Trim63;Cks2;Nme1;Melk;Cblc;Tpmt;Pim1;Nat8;Ltc4s;Gk5;Neurl3;Has2;Tpst1;Plk1;Cit;Cdc42bpg;Gapdh;Ccl12;Fasn;Galnt5;Sult1a1;Matk;…
GO:0097159	organic cyclic compound binding	227	4279	0.999979	1	29597;85497;81819;89813;79431;689399;29599;312897;679975;29213;304815;100912290;81726;289777;353250;286896;246118;502125;304988;289185;294883;29290;171099;502129;311336;498840;365042;25060;360243;298850;291100;362510;191575;363227;24787;293154;311723;24299;266684;25515;83620;89788;24383;50671;291159;83783;294286;83781;60450;29452;294071;306962;691488;100365043;360621;25589;292301;366949;305827;29…	P2ry2;Klf15;Pax8;Pdk4;Bhlhe40;Cenpw;Atp2b3;Msc;Gpr183;Tubb4a;Elf3;LOC100912290;Mvd;Fignl1;Niacr1;Sgpl1;Tubb3;Hist1h2ah;Mnda;Creg1;Ralyl;Adora1;Rasd2;Hist1h2ai;Nusap1;Tmem173;Rab32;Hk3;Top2a;Cenpa;Irf4;Melk;Nme1;Nabp1;Sod2;Folr2;Sox18;Cyp2a3;Cyp2d1;Plk1;Cit;Gna15;Gapdh;Fasn;Hist1h2ail;Sult1a1;Kifc1;Lgals3;Matk;Epas1;Hells;Hist1h2ac;Hist3h2bb;LOC100365043;Cdc6;Kdr;T;Mafa;Wdhd1;Rnaset2;Hk2;Tk1;Ntrk2…
GO:1901363	heterocyclic compound binding	221	4225	0.99999	1	29597;85497;81819;89813;79431;689399;29599;312897;29213;100360950;100912290;81726;289777;353250;286896;246118;502125;304988;289185;294883;29290;84492;502129;498840;365042;25060;360243;298850;291100;362510;191575;363227;24787;293154;311723;24299;266684;25515;83620;89788;24383;50671;291159;83783;294286;83781;60450;29452;294071;306962;691488;100365043;360621;25589;292301;366949;305827;292306;25059;2…	P2ry2;Klf15;Pax8;Pdk4;Bhlhe40;Cenpw;Atp2b3;Msc;Tubb4a;LOC100360950;LOC100912290;Mvd;Fignl1;Niacr1;Sgpl1;Tubb3;Hist1h2ah;Mnda;Creg1;Ralyl;Adora1;Tec;Hist1h2ai;Tmem173;Rab32;Hk3;Top2a;Cenpa;Irf4;Melk;Nme1;Nabp1;Sod2;Folr2;Sox18;Cyp2a3;Cyp2d1;Plk1;Cit;Gna15;Gapdh;Fasn;Hist1h2ail;Sult1a1;Kifc1;Lgals3;Matk;Epas1;Hells;Hist1h2ac;Hist3h2bb;LOC100365043;Cdc6;Kdr;T;Mafa;Wdhd1;Rnaset2;Hk2;Tk1;Ntrk2;Cdk1;LO…
GO:0004872	receptor activity	85	1972	0.999998	1	499264;64357;294335;24807;25154;299210;25339;310693;500590;299242;685243;24953;25704;364754;688730;117257;84387;246075;81680;301066;498638;50692;24890;29235;295691;58966;290562;289235;353250;289237;100124593;293591;289596;25544;192211;298857;25033;170568;367074;29597;63843;85266;29290;679975;293186;83567;25316;365901;29610;64546;367315;89804;25054;50592;117022;681070;314386;191573;305355;113959;3…	Apobr;Cd200r1;Susd2;Tacr1;Pgr;Esrrb;Npr3;Cd5l;Tnfrsf9;Gpr65;Ackr4;Gcgr;Il2ra;Fzd8;Gpr84;Gpr176;Pglyrp1;Prlhr;Lifr;Ccr8;Msr1;Plaur;Esr1;Galr3;Frzb;Ramp2;Sema3g;Slamf9;Niacr1;Slamf8;Cxcr6;Cd163l1;Corin;Sele;Prom2;Gpr113;Sstr1;Dmbt1;Tmprss4;P2ry2;P2ry4;Prss12;Adora1;Gpr183;Lyve1;Mchr1;Ms4a2;Gnat2;Tgfbr3;Il12b;Gpr35;Tek;Ntrk2;Gria1;Il1r2;Fcamr;Gpr68;Grin3a;Tlr10;C5ar1;Itgb8;Ptafr;Ccr5;Ctsh;Gpr116;Pig…
GO:0004871	signal transducer activity	83	2036	1	1	29597;685243;24807;25154;299210;89788;25054;299242;24953;25704;364754;688730;54296;84387;246075;290361;81680;50592;29235;360161;24890;295691;58966;24392;353250;100124593;25425;25544;192211;298857;25033;29610;63843;29290;679975;293186;113959;24451;365901;50692;64546;367315;89804;25339;301066;117022;681070;314386;191573;305355;65161;292699;287885;117029;116745;245977;25046;84007;114203;25316;25572;…	P2ry2;Ackr4;Tacr1;Pgr;Esrrb;Gna15;Ntrk2;Gpr65;Gcgr;Il2ra;Fzd8;Gpr84;Rgs7;Pglyrp1;Prlhr;Dok2;Lifr;Gria1;Galr3;Nek6;Esr1;Frzb;Ramp2;Gja1;Niacr1;Cxcr6;Ctsh;Sele;Prom2;Gpr113;Sstr1;Tgfbr3;P2ry4;Adora1;Gpr183;Lyve1;C5ar1;Hmox1;Gnat2;Plaur;Il12b;Gpr35;Tek;Npr3;Ccr8;Il1r2;Fcamr;Gpr68;Grin3a;Tlr10;Litaf;Cblc;Sectm1a;Ccr5;Kcnh6;Gpr116;Pigr;C3ar1;Sh2b2;Ms4a2;Tnfrsf4;Hpgd;Tyrobp;Gnai1;Mrgprx2;Ednrb;Xcr1;Ly9…
GO:0060089	molecular transducer activity	83	2036	1	1	29597;685243;24807;25154;299210;89788;25054;299242;24953;25704;364754;688730;54296;84387;246075;290361;81680;50592;29235;360161;24890;295691;58966;24392;353250;100124593;25425;25544;192211;298857;25033;29610;63843;29290;679975;293186;113959;24451;365901;50692;64546;367315;89804;25339;301066;117022;681070;314386;191573;305355;65161;292699;287885;117029;116745;245977;25046;84007;114203;25316;25572;…	P2ry2;Ackr4;Tacr1;Pgr;Esrrb;Gna15;Ntrk2;Gpr65;Gcgr;Il2ra;Fzd8;Gpr84;Rgs7;Pglyrp1;Prlhr;Dok2;Lifr;Gria1;Galr3;Nek6;Esr1;Frzb;Ramp2;Gja1;Niacr1;Cxcr6;Ctsh;Sele;Prom2;Gpr113;Sstr1;Tgfbr3;P2ry4;Adora1;Gpr183;Lyve1;C5ar1;Hmox1;Gnat2;Plaur;Il12b;Gpr35;Tek;Npr3;Ccr8;Il1r2;Fcamr;Gpr68;Grin3a;Tlr10;Litaf;Cblc;Sectm1a;Ccr5;Kcnh6;Gpr116;Pigr;C3ar1;Sh2b2;Ms4a2;Tnfrsf4;Hpgd;Tyrobp;Gnai1;Mrgprx2;Ednrb;Xcr1;Ly9…
GO:0038023	signaling receptor activity	66	1843	1	1	29597;685243;24807;25154;299210;25054;299242;24953;25704;364754;688730;117257;84387;246075;81680;50592;29235;50692;24890;295691;58966;353250;100124593;25544;192211;298857;25033;29610;63843;29290;679975;293186;83567;25316;365901;64546;367315;89804;25339;301066;117022;681070;314386;191573;305355;113959;58949;117029;25425;245977;25046;84007;25572;79242;404640;50672;301086;448830;498289;117264;25083;…	P2ry2;Ackr4;Tacr1;Pgr;Esrrb;Ntrk2;Gpr65;Gcgr;Il2ra;Fzd8;Gpr84;Gpr176;Pglyrp1;Prlhr;Lifr;Gria1;Galr3;Plaur;Esr1;Frzb;Ramp2;Niacr1;Cxcr6;Sele;Prom2;Gpr113;Sstr1;Tgfbr3;P2ry4;Adora1;Gpr183;Lyve1;Mchr1;Ms4a2;Gnat2;Il12b;Gpr35;Tek;Npr3;Ccr8;Il1r2;Fcamr;Gpr68;Grin3a;Tlr10;C5ar1;Ptafr;Ccr5;Ctsh;Gpr116;Pigr;C3ar1;Tnfrsf4;Hpgd;Mrgprx2;Ednrb;Xcr1;Ly96;Opn3;P2ry6;Adra2a;Gabrr2;Sctr;Vipr1;Kdr;Gabrp
GO:0003676	nucleic acid binding	111	2706	1	1	85497;81819;680522;79431;689399;312897;100912290;502125;304988;294883;54264;502129;360243;294071;291100;191575;363227;24787;311723;100360950;50671;83781;29452;306962;691488;100365043;292301;366949;305827;292306;170897;680322;117254;100360781;83791;24571;296344;170955;291885;29728;100910554;306970;298850;680663;680097;680312;24883;100360977;361514;29143;64160;25330;292060;25334;291159;65199;316129…	Klf15;Pax8;Hist1h1b;Bhlhe40;Cenpw;Msc;LOC100912290;Hist1h2ah;Mnda;Ralyl;Mafb;Hist1h2ai;Top2a;Hells;Irf4;Nme1;Nabp1;Sod2;Sox18;LOC100360950;Fasn;Lgals3;Epas1;Hist1h2ac;Hist3h2bb;LOC100365043;T;Mafa;Wdhd1;Rnaset2;Sphk1;LOC680322;Prdx1;LOC100360781;Fdps;Muc1;Mybl2;Zfp483;Mcm5;Mcm4;LOC100910554;Hist1h2an;Cenpa;LOC680663;LOC680097;Hist1h2bk;Wt1;LOC100360977;Meis3;Grn;Basp1;Lipe;Irf8;Bhlha15;Hist1h2ail…
GO:0003723	RNA binding	35	1242	1	1	25330;64557;298068;117254;100360781;24333;497672;83791;680097;25017;100912290;287633;102555453;680522;294883;306081;680663;360243;25308;191575;363227;24883;311336;25383;100360977;100360950;310395;83516;50671;83781;140586;81772;29143;305827;292306	Lipe;Bard1;Sec61b;Prdx1;LOC100360781;Eno1;Brca1;Fdps;LOC680097;Myo5a;LOC100912290;Lrrc59;LOC102555453;Hist1h1b;Ralyl;Pcdh20;LOC680663;Top2a;Cstb;Nme1;Nabp1;Wt1;Nusap1;Apobec1;LOC100360977;LOC100360950;Ccr4;Ppargc1a;Fasn;Lgals3;Sox9;Rps9;Grn;Wdhd1;Rnaset2
GO:0044822	poly(A) RNA binding	23	979	1	1	298068;117254;24333;83791;680097;25017;100912290;287633;102555453;680522;294883;306081;680663;360243;25308;191575;311336;100360977;100360950;310395;50671;83781;29143	Sec61b;Prdx1;Eno1;Fdps;LOC680097;Myo5a;LOC100912290;Lrrc59;LOC102555453;Hist1h1b;Ralyl;Pcdh20;LOC680663;Top2a;Cstb;Nme1;Nusap1;LOC100360977;LOC100360950;Ccr4;Fasn;Lgals3;Grn
GO:0004888	transmembrane signaling receptor activity	59	1764	1	1	29597;685243;24807;25316;25054;299242;24953;25704;364754;688730;117257;246075;81680;50592;29235;295691;25425;353250;100124593;192211;298857;25033;29610;63843;29290;679975;293186;83567;365901;64546;367315;89804;25339;301066;117022;681070;314386;191573;305355;113959;58949;117029;245977;25046;84007;25572;79242;404640;50672;301086;25544;498289;117264;25083;29695;81779;24875;25589;81658	P2ry2;Ackr4;Tacr1;Ms4a2;Ntrk2;Gpr65;Gcgr;Il2ra;Fzd8;Gpr84;Gpr176;Prlhr;Lifr;Gria1;Galr3;Frzb;Ctsh;Niacr1;Cxcr6;Prom2;Gpr113;Sstr1;Tgfbr3;P2ry4;Adora1;Gpr183;Lyve1;Mchr1;Gnat2;Il12b;Gpr35;Tek;Npr3;Ccr8;Il1r2;Fcamr;Gpr68;Grin3a;Tlr10;C5ar1;Ptafr;Ccr5;Gpr116;Pigr;C3ar1;Tnfrsf4;Hpgd;Mrgprx2;Ednrb;Xcr1;Sele;Opn3;P2ry6;Adra2a;Gabrr2;Sctr;Vipr1;Kdr;Gabrp
GO:0004930	G-protein coupled receptor activity	37	1540	1	1	29597;685243;24807;25339;24953;364754;688730;117257;246075;29235;25033;353250;100124593;298857;29290;83567;365901;367315;301066;314386;63843;113959;58949;117029;245977;299242;84007;79242;404640;50672;301086;679975;498289;117264;25083;81779;24875	P2ry2;Ackr4;Tacr1;Npr3;Gcgr;Fzd8;Gpr84;Gpr176;Prlhr;Galr3;Sstr1;Niacr1;Cxcr6;Gpr113;Adora1;Mchr1;Gnat2;Gpr35;Ccr8;Gpr68;P2ry4;C5ar1;Ptafr;Ccr5;Gpr116;Gpr65;C3ar1;Hpgd;Mrgprx2;Ednrb;Xcr1;Gpr183;Opn3;P2ry6;Adra2a;Sctr;Vipr1
